# Supplementary material for: Indium promoted C(sp3)–P bond formation by the Domino A3-coupling method – a combined experimental and computational study
Source: Royal Society of Chemistry journal article supplement (doi:10.1039/d0qi01210f), 2020-11-19
Supplement: d0qi01210f1.pdf [file d0qi01210f1.pdf]

*Supporting Information for*

**Indium promoted C(sp<sup>3</sup>)-P bond formation by Domino A<sup>3</sup>-coupling method  
- A combined experimental and computational study**

Suman Das<sup>a†</sup>, Parveen Rawal<sup>b†</sup>, Jayeeta Bhattacharjee<sup>a†</sup>, Ajitrao Devadkar<sup>a</sup>, Kuntal Pal<sup>c</sup>, Puneet Gupta,<sup>\*b</sup> and Tarun K. Panda<sup>\*a</sup>

<sup>a</sup>Department of Chemistry, Indian Institute of Technology Hyderabad, Kandi – 502 285, Sangareddy, Telangana, India.

<sup>b</sup>Department of Chemistry, Indian Institute of Technology Roorkee, Roorkee – 247667, Uttarakhand, India.

<sup>c</sup>Department of Chemistry, University of Calcutta, 92, A.P.C. Road, Kolkata 700009, India.

**Table of Contents**

|                                                                                                    |      |
|----------------------------------------------------------------------------------------------------|------|
| 1. X-ray crystallographic analyses: .....                                                          | S1   |
| 2. NMR spectrum for metal complexes .....                                                          | S3   |
| 3. General procedure for synthesis of $\alpha$ -aminophosphine oxides using 3a as a catalyst. .... | S7   |
| 4. Characterization Data of $\alpha$ -aminophosphine oxides .....                                  | S8   |
| 5. NMR data of $\alpha$ -aminophosphine oxides.....                                                | S21  |
| 6. Computational Details .....                                                                     | S73  |
| 7. (Ph) <sub>2</sub> P(=O)H → (Ph) <sub>2</sub> P–OH Tautomerization : A DFT Study.....            | S73  |
| 8. Energy Table for Fig. 8.....                                                                    | S75  |
| 9. Energy Table for Fig. 12.....                                                                   | S76  |
| 10. Energy Table for Fig. 13.....                                                                  | S76  |
| 11. Energy Table for Fig. FS112 .....                                                              | S77  |
| 12. Cartesian Coordinates of the Optimized Structures .....                                        | S77  |
| 13. Reference. ....                                                                                | S109 |

## 1. X-ray crystallographic analyses:

Single crystals of complexes **2a**, **2b** and **3a** were grown from a concentrated solution of toluene or toluene/THF (3:1) in an argon-filled atmosphere at -35 °C and for **6b** and **6c** crystals grown from DCM at room temperature. A crystal of suitable dimensions of complexes **2a**, **2b**, **3a**, **4m**, **6b**, and **6d** was mounted on a CryoLoop (Hampton Research Corp.) with a layer of light mineral oil. All the three crystals **2a**, **2b** and **3a** were measured at 293 K. All measurements were made on an Rigaku Supernova X-calibur Eos CCD detector with graphite monochromatic Mo-K $\alpha$  (0.71073 Å) radiation. Crystal data and structure refinement parameters of complexes **2a**, **2b**, **3a**, **4m**, **6b** and **6d** are summarized in Table TS1. The structures were solved by direct methods (SIR2004)<sup>[1]</sup> and refined on  $F^2$  by full-matrix least-squares methods, using SHELXL-2016/6.<sup>[2]</sup> Non-hydrogen atoms were anisotropically refined. H-atoms were included in the refinement on calculated positions riding on their carrier atoms. The function minimized was  $[\sum w(F_o^2 - F_c^2)^2]$  ( $w = 1 / [\sigma^2(F_o^2) + (aP)^2 + bP]$ ), where  $P = (\text{Max}(F_o^2, 0) + 2F_c^2) / 3$  with  $\sigma^2(F_o^2)$  from counting statistics. The function  $R1$  and  $wR2$  were  $(\sum ||F_o| - |F_c||) / \sum |F_o|$  and  $[\sum w(F_o^2 - F_c^2)^2 / \sum (wF_o^4)]^{1/2}$ , respectively. The ORTEP-3 program was used to draw the molecules of **2a**, **2b**, **3a**, **4m**, **6b** and **6d**. Crystallographic data (excluding structure factors) for the structures reported in this paper have been deposited with the Cambridge Crystallographic Data Centre as supplementary publication no. CCDC 2035016 (**2a**), 2035015 (**2b**), 2035020 (**3a**), 2035017 (**4m**), 2035019 (**6b**), 2035018 (**6d**). Copies of the data can be obtained free of charge on application to CCDC, 12 Union Road, Cambridge CB21EZ, UK (fax: + (44)1223-336-033; email: [deposit@ccdc.cam.ac.uk](mailto:deposit@ccdc.cam.ac.uk)).

**Table TS1.** Crystallography table of metal complexes **2a**, **2b**, **3a**, **4m**, **6b** and **6d**.

| Crystal Parameters  | <b>2a</b>                                                             | <b>2b</b>                                                                                        | <b>3a</b>                                                                        | <b>4m</b>                                         | <b>6b</b>                                         | <b>6d</b>                                         |
|---------------------|-----------------------------------------------------------------------|--------------------------------------------------------------------------------------------------|----------------------------------------------------------------------------------|---------------------------------------------------|---------------------------------------------------|---------------------------------------------------|
| Identification code | 6916                                                                  | 6194                                                                                             | 8467                                                                             | 10056                                             | 9907                                              | SN3                                               |
| CCDC No.            | 2035015                                                               | 2035016                                                                                          | 2035020                                                                          | 2035017                                           | 2035019                                           | 2035018                                           |
| Empirical formula   | C <sub>34</sub> H <sub>48</sub> ClIn<br>N <sub>2</sub> O <sub>2</sub> | C <sub>56</sub> H <sub>72</sub> Cl <sub>2</sub> In <sub>2</sub><br>N <sub>4</sub> O <sub>4</sub> | C <sub>39</sub> H <sub>56</sub> F <sub>3</sub> InN <sub>2</sub> O <sub>6</sub> S | C <sub>26</sub> H <sub>21</sub> N <sub>2</sub> OP | C <sub>26</sub> H <sub>24</sub> NO <sub>3</sub> P | C <sub>28</sub> H <sub>28</sub> NO <sub>3</sub> P |
| Formula weight      | 667.01                                                                | 1165.71                                                                                          | 852.73                                                                           | 408.42                                            | 429.43                                            | 457.48                                            |

|                                             |                                                                            |                                                                     |                                                                     |                                                                    |                                                                     |                                                                     |
|---------------------------------------------|----------------------------------------------------------------------------|---------------------------------------------------------------------|---------------------------------------------------------------------|--------------------------------------------------------------------|---------------------------------------------------------------------|---------------------------------------------------------------------|
| <i>T</i> (K)                                | 293(2) K                                                                   | 150(2) K                                                            | 298(2) K                                                            | 293(2) K                                                           | 293(2) K                                                            | 298 K                                                               |
| $\lambda$ (Å)                               | 0.71073                                                                    | 1.54184                                                             | 0.71073                                                             | 0.71073                                                            | 0.71073                                                             | 0.71073                                                             |
| Crystal system                              | Monoclinic                                                                 | Monoclinic                                                          | Triclinic                                                           | Triclinic                                                          | Triclinic                                                           | Triclinic                                                           |
| Space group                                 | <i>P</i> 21/ <i>c</i>                                                      | <i>I</i> 2/ <i>a</i>                                                | <i>P</i> -1                                                         | <i>P</i> -1                                                        | <i>P</i> -1                                                         | <i>P</i> -1                                                         |
| <i>a</i> (Å)                                | 10.7513(3)                                                                 | 15.9273(12)                                                         | 11.6241(14)                                                         | 9.2668(7)                                                          | 13.9729(6)                                                          | 10.7629 (15)                                                        |
| <i>b</i> (Å)                                | 28.9206(8)                                                                 | 13.2281(8)                                                          | 13.2478(16)                                                         | 9.9885(6)                                                          | 13.9884(6)                                                          | 11.3046 (16)                                                        |
| <i>c</i> (Å)                                | 11.1932(3)                                                                 | 28.269(3)                                                           | 16.0639(10)                                                         | 12.8946(7)                                                         | 14.5287(5)                                                          | 11.5299 (16)                                                        |
| $\alpha$ (°)                                | 90                                                                         | 90                                                                  | 97.765(9)                                                           | 102.481(5)                                                         | 117.057(4)                                                          | 90.972 (11)                                                         |
| $\beta$ (°)                                 | 102.634(3)                                                                 | 91.925(10)                                                          | 110.219(9)                                                          | 93.899(5)                                                          | 96.593(3)                                                           | 103.876 (12)                                                        |
| $\gamma$ (°)                                | 90                                                                         | 90                                                                  | 101.393(10)                                                         | 112.376(6)                                                         | 101.316(3)                                                          | 113.970 (14)                                                        |
| <i>V</i> (Å <sup>3</sup> )                  | 3396.08(17)                                                                | 5952.7(8)                                                           | 2219.2(4)                                                           | 1062.56(13)                                                        | 2411.13(19)                                                         | 1234.1 (3)                                                          |
| <i>Z</i>                                    | 4                                                                          | 4                                                                   | 2                                                                   | 2                                                                  | 4                                                                   | 2                                                                   |
| <i>D</i> <sub>calc</sub> g cm <sup>-3</sup> | 1.305                                                                      | 1.301                                                               | 1.276                                                               | 1.277                                                              | 1.183                                                               | 1.231                                                               |
| $\mu$ (mm <sup>-1</sup> )                   | 0.805                                                                      | 7.356                                                               | 0.634                                                               | 0.149                                                              | 0.140                                                               | 0.140                                                               |
| <i>F</i> (000)                              | 1392                                                                       | 2400                                                                | 888                                                                 | 428                                                                | 904                                                                 | 484                                                                 |
| Theta range for data collection             | 3.054 to 29.018 deg                                                        | 6.256 to 146.516 deg                                                | 3.093 to 29.203 deg.                                                | 2.285 to 29.104 deg                                                | 2.202 to 29.113 deg.                                                | 3.493–24.998 deg.                                                   |
| Limiting indices                            | -<br>14 ≤ <i>h</i> ≤ 13,<br>-<br>33 ≤ <i>k</i> ≤ 39,<br>-7 ≤ <i>l</i> ≤ 14 | -17 ≤ <i>h</i> ≤ 19,<br>-14 ≤ <i>k</i> ≤ 16,<br>-34 ≤ <i>l</i> ≤ 34 | -15 ≤ <i>h</i> ≤ 14,<br>-17 ≤ <i>k</i> ≤ 17,<br>-21 ≤ <i>l</i> ≤ 21 | -12 ≤ <i>h</i> ≤ 9,<br>-13 ≤ <i>k</i> ≤ 12,<br>-16 ≤ <i>l</i> ≤ 16 | -17 ≤ <i>h</i> ≤ 18,<br>-17 ≤ <i>k</i> ≤ 18,<br>-19 ≤ <i>l</i> ≤ 17 | -12 ≤ <i>h</i> ≤ 12,<br>-11 ≤ <i>k</i> ≤ 13,<br>-13 ≤ <i>l</i> ≤ 13 |
| Reflections collected / unique              | 15351 / 7774 [R(int) = 0.0372]                                             | 11307 / 5681 [R(int) = 0.0517]                                      | 48130 / 10793 [R(int) = 0.1066]                                     | 7889 / 4867 [R(int) = 0.0211]                                      | 21219 / 11118 [R(int) = 0.0222]                                     | 7902 / 4255 [R(int) = 0.031]                                        |
| Completeness to theta                       | 99.8 %                                                                     | 99.6 %                                                              | 99.8 %                                                              | 100.0 %                                                            | 99.9 %                                                              | 97.9%                                                               |
| Absorption correction                       | Multi-scan                                                                 | Multi-scan                                                          | Multi-scan                                                          | Multi-scan                                                         | Multi-scan                                                          | Multi-scan                                                          |
| Max. and min. transmission                  | 1.00000 and 0.82642                                                        | 1.00000 and 0.91324                                                 | 1.00000 and 0.68095                                                 | 1.00000 and 0.82620                                                | 1.00000 and 0.81632                                                 | 1.00000 and 0.679                                                   |
| Refinement method                           | Full-matrix least-squares on                                               | Full-matrix least-squares                                           | Full-matrix least-squares on <i>F</i> <sup>2</sup>                  | Full-matrix least-squares                                          | Full-matrix least-squares                                           | Full-matrix least-squares                                           |

|                                   | F <sup>2</sup>                     | on F <sup>2</sup>                |                                    | on F <sup>2</sup>                  | on F <sup>2</sup>                  | on F <sup>2</sup>         |
|-----------------------------------|------------------------------------|----------------------------------|------------------------------------|------------------------------------|------------------------------------|---------------------------|
| Data / restraints / parameters    | 7774 / 0 / 373                     | 5681 / 0 / 306                   | 10793 / 0 / 481                    | 4867 / 0 / 271                     | 11118 / 0 / 561                    | 4255 / 0 / 300            |
| Goodness-of-fit on F <sup>2</sup> | 1.047                              | 1.143                            | 1.065                              | 1.050                              | 1.436                              | 1.044                     |
| Final R indices [I > 2σ(I)]       | R1 = 0.0444, wR2 = 0.0771          | R1 = 0.0769, wR2 = 0.2133        | R1 = 0.0616, wR2 = 0.1333          | R1 = 0.0503, wR2 = 0.1257          | R1 = 0.1129, wR2 = 0.3640          | R1 = 0.0744, wR2 = 0.2040 |
| R indices (all data)              | R1 = 0.0732, wR2 = 0.0896          | R1 = 0.1039, wR2 = 0.2823        | R1 = 0.1106, wR2 = 0.1730          | R1 = 0.0689, wR2 = 0.1405          | R1 = 0.1431, wR2 = 0.3953          | R1 = 0.1014, wR2 = 0.1794 |
| Largest diff. peak and hole       | 0.651 and -0.389 e.Å <sup>-3</sup> | 2.59 and -5.78 e.Å <sup>-3</sup> | 1.308 and -1.004 e.Å <sup>-3</sup> | 0.486 and -0.331 e.Å <sup>-3</sup> | 2.367 and -0.377 e.Å <sup>-3</sup> |                           |

## 2. NMR spectrum for metal complexes

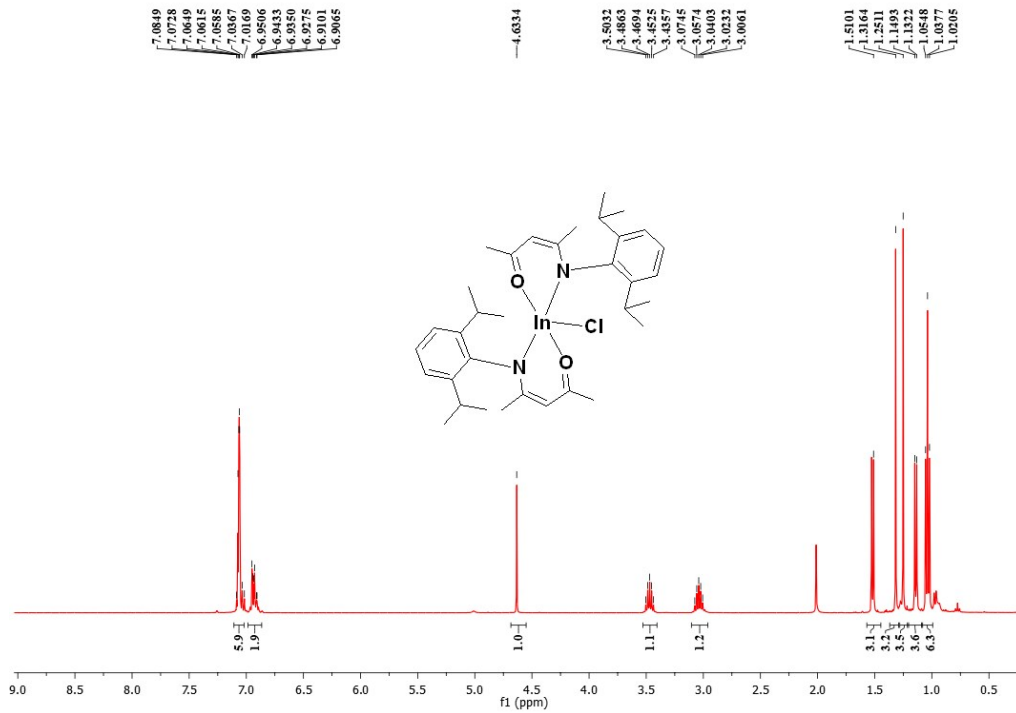

Fig FS1:  $^1\text{H NMR}$  for complex 2a in  $\text{C}_6\text{D}_6$ .

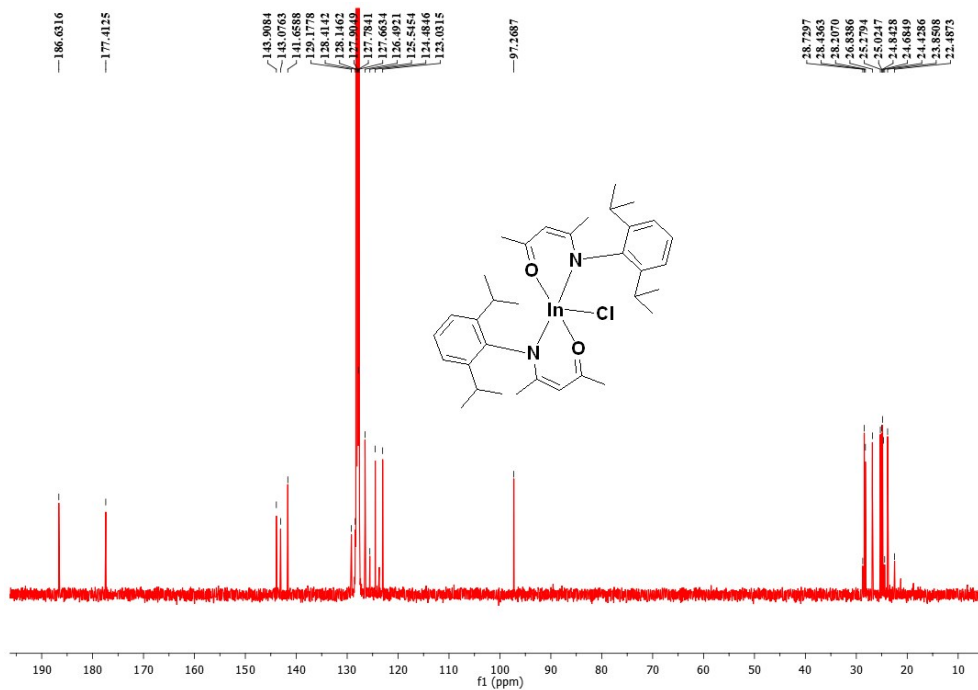

Fig FS2.  $^{13}\text{C}\{^1\text{H}\}$  NMR for complex 2a in  $\text{C}_6\text{D}_6$ .

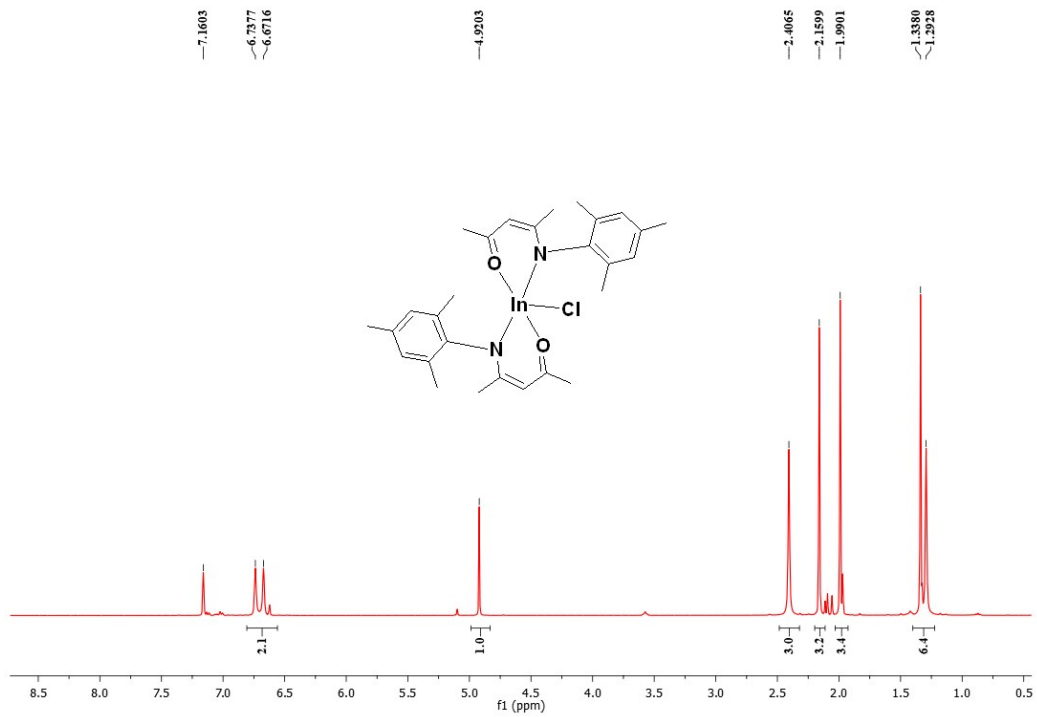

**Fig FS3.**  $^1\text{H}$  NMR for complex **2b** in  $\text{C}_6\text{D}_6$ .

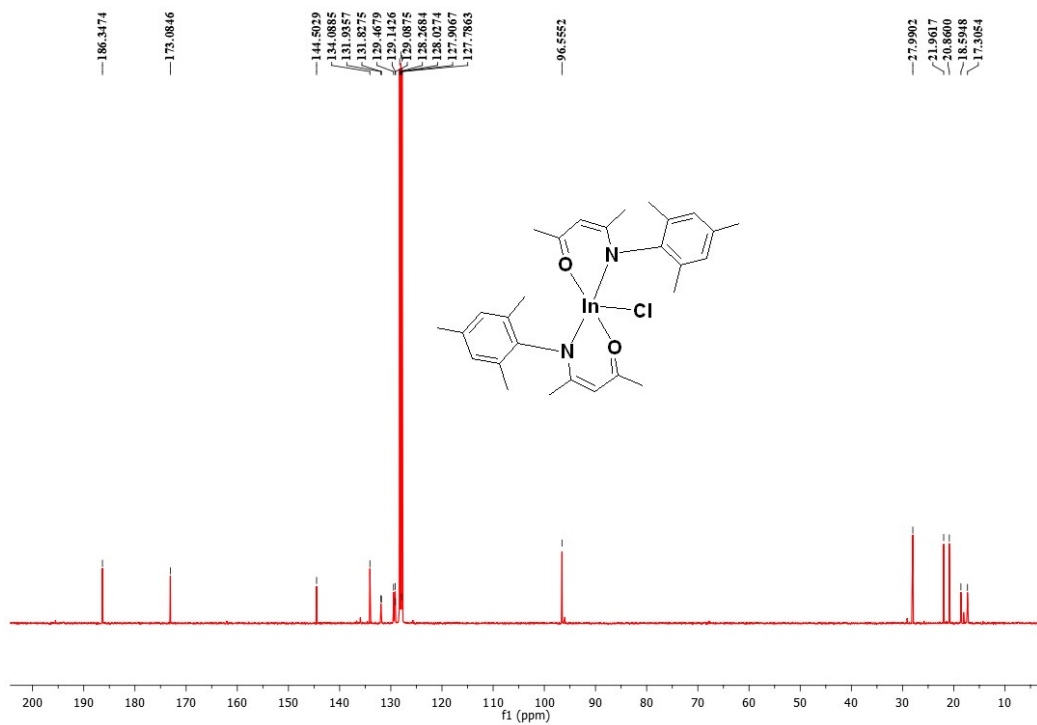

**Fig FS4.**  $^{13}\text{C}\{^1\text{H}\}$  NMR for complex **2b** in  $\text{C}_6\text{D}_6$ .

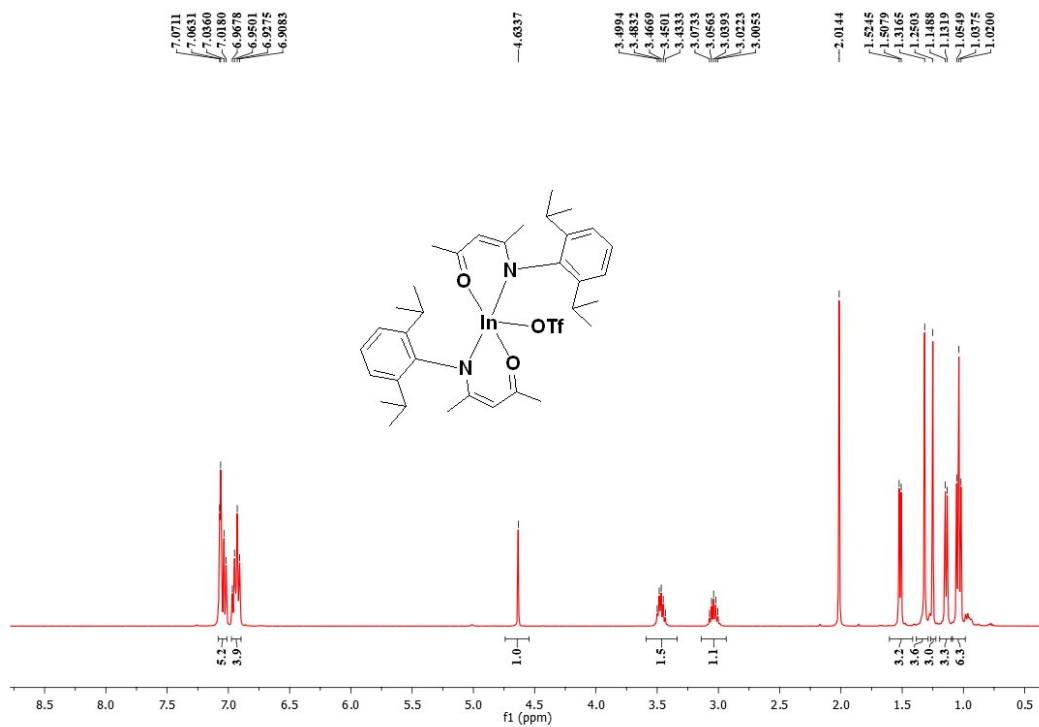

**Fig FS5.** <sup>1</sup>H NMR for complex **3a** in C<sub>6</sub>D<sub>6</sub>.

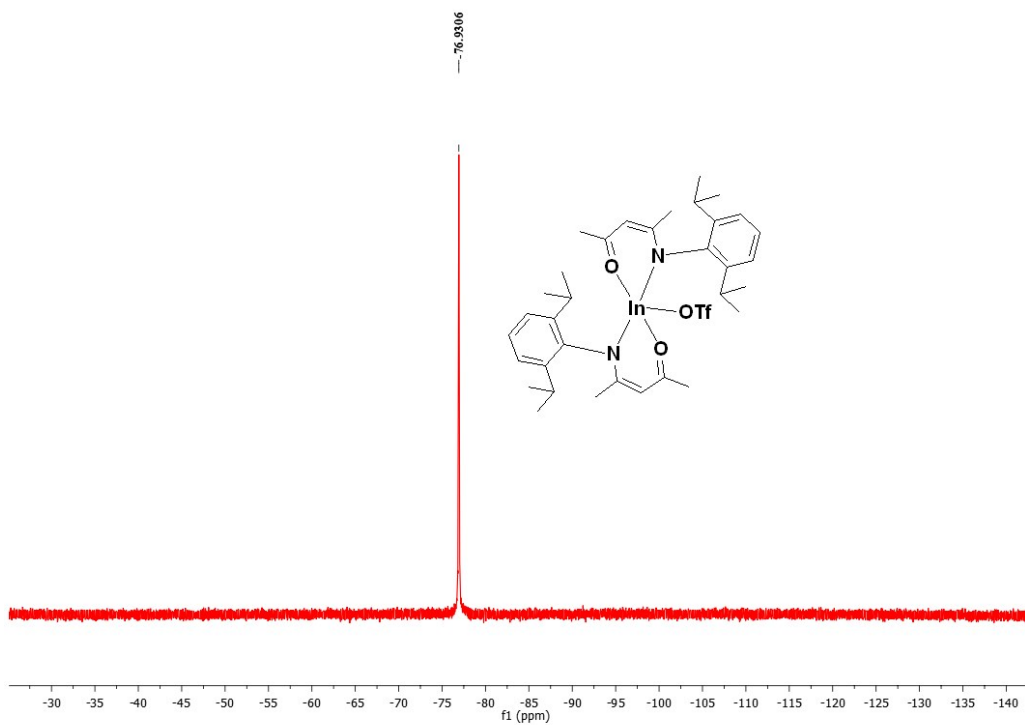

**Fig FS6.** <sup>19</sup>F NMR for complex **3a** in C<sub>6</sub>D<sub>6</sub>.

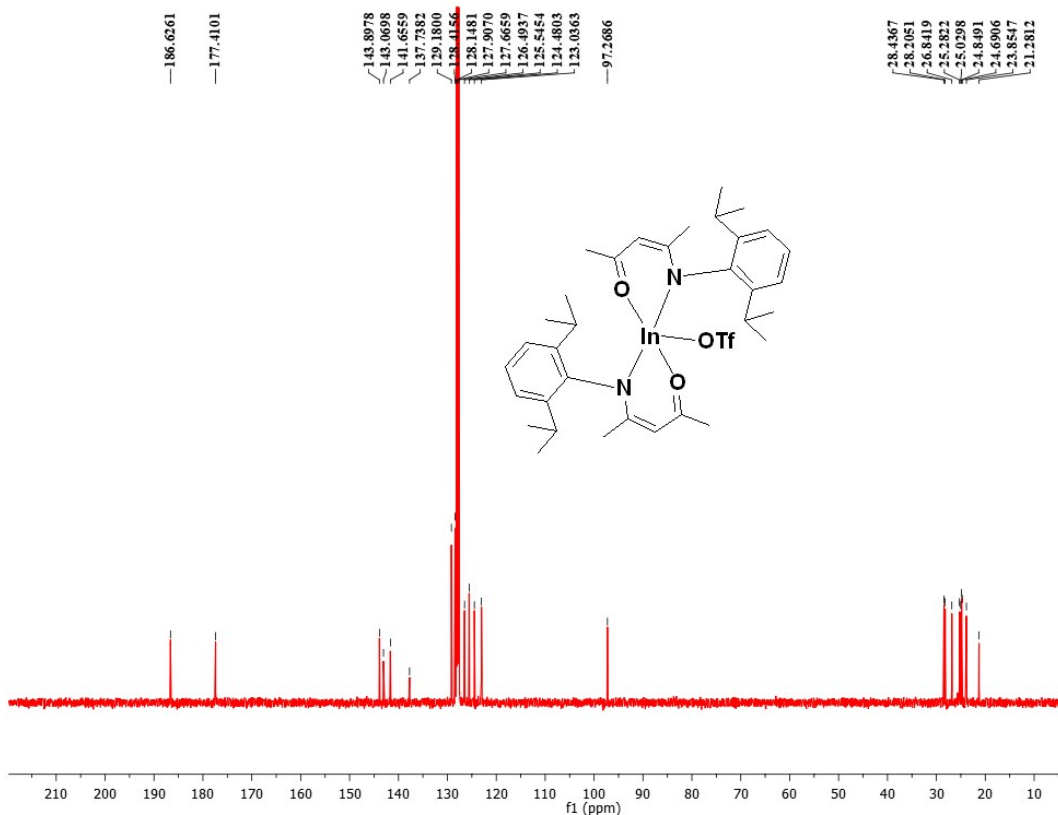

**Fig FS7.**  $^{13}\text{C}\{^1\text{H}\}$  NMR for complex **3a** in  $\text{C}_6\text{D}_6$ .

### 3. General procedure for synthesis of $\alpha$ -aminophosphine oxides using **3a** as a catalyst.

Inside the glove box to a 25 mL dry Schlenk flask, the required aldehyde precursor (0.9433 mmol, 1 equiv) was added to the reaction mixture of amine (0.9433 mmol, 1 equiv.) and Diphenyl phosphine oxide (0.9433 mmol, 1 equiv.) and 2 mol% complex **3a** (18 mg, 0.02358 mmol). The colourless reaction mixture was stirred at room temperature. After six hours, the reaction mixture was quenched and workup with water and compound extracted in dichloromethane as an organic layer for 3 times. Then the final product was purified by column chromatography in hexane/EtOAc (100:5). The products were identified according to  $^1\text{H}$ ,  $^{31}\text{P}$   $^{13}\text{C}$ , and DEPT NMR spectroscopy (wherever necessary), as well as MS analysis.



#### 4. Characterization Data of $\alpha$ -aminophosphine oxides

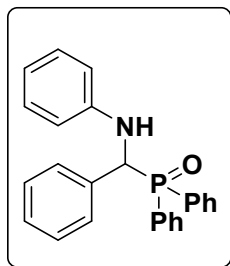

Yield (**4a**): 346 mg, 96%.  $^1\text{H}$  NMR (400 MHz,  $\text{CDCl}_3$ , 25  $^\circ\text{C}$ ):  $\delta_{\text{H}}$  7.88 - 7.84 (m, 3H, Ar), 7.56 - 7.54 (m, 1H, Ar), 7.50 - 7.46 (m, 3H, Ar), 7.40 - 7.35 (m, 4H, Ar), 7.28 - 7.25 (m, 3H, Ar), 7.15 - 7.06 (m, 9H, Ar), 6.68 - 6.58 (m, 3H, Ar), 5.20 - 5.17 (m, 1H, *CH*), ppm.  $^{13}\text{C}\{^1\text{H}\}$  NMR (100 MHz,  $\text{CDCl}_3$ ):  $\delta_{\text{C}}$  160.4, 152.9, 136.2, 131.7, 131.6, 131.3, 129.7, 129.2, 129.1, 128.8, 128.4, 128.3, 128.1, 128.0, 125.9, 120.8, 118.3, 115.1, 113.9, 57.3 ppm.  $^{31}\text{P}\{^1\text{H}\}$  NMR (161.9 MHz,  $\text{CDCl}_3$ ):  $\delta_{\text{P}}$  = 33.2 ppm.

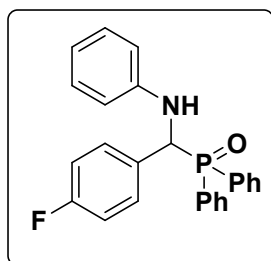

Yield (**4b**): 355 mg, 94%.  $^1\text{H}$  NMR (400 MHz,  $\text{CDCl}_3$ , 25  $^\circ\text{C}$ ):  $\delta_{\text{H}}$  7.86 - 7.83 (m, 2H, Ar), 7.49 - 7.48 (m, 1H, Ar), 7.43 - 7.42 (m, 5H, Ar), 7.40 - 7.29 (m, 2H, Ar), 7.12 - 7.07 (m, 4H, Ar), 6.83 - 6.79 (m, 2H, Ar), 6.70 - 6.69 (m, 1H, Ar), 6.58 - 6.56 (m, 2H, Ar), 5.17 - 5.16 (m, 1H, *CH*) ppm.  $^{13}\text{C}\{^1\text{H}\}$  NMR (100 MHz,  $\text{CDCl}_3$ ):  $\delta_{\text{C}}$  165.9, 163.4, 158.8, 151.8, 146.0, 145.8, 131.6, 131.5, 130.7, 129.2, 128.9, 128.3, 128.2, 126.0, 120.8, 118.2, 116.0, 115.8, 115.3, 115.0, 113.9, 57.0, 56.3, ppm.  $^{31}\text{P}\{^1\text{H}\}$  NMR (161.9 MHz,  $\text{CDCl}_3$ ):  $\delta_{\text{P}}$  = 33.13 ppm.

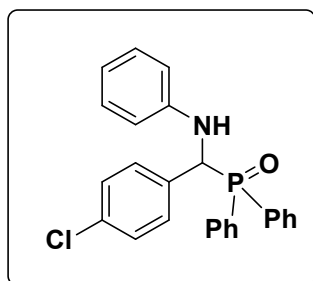

Yield (**4c**): 385 mg, 98%.  $^1\text{H}$  NMR (400 MHz,  $\text{CDCl}_3$ , 25  $^\circ\text{C}$ ):  $\delta_{\text{H}}$  7.90 - 7.85 (m, 2H, Ar), 7.51 - 7.47 (m, 1H, Ar), 7.46 - 7.43 (m, 5H, Ar), 7.34 - 7.28 (m, 2H, Ar), 7.13 - 7.09 (m, 6H, Ar), 6.74 - 6.70 (m, 1H, Ar), 6.60 - 5.58 (m, 2H, Ar), 5.20 - 5.17 (m, 1H, *CH*), ppm.  $^{13}\text{C}\{^1\text{H}\}$  NMR (100 MHz,  $\text{CDCl}_3$ ):  $\delta_{\text{C}}$  145.8, 145.7,

133.8, 133.5, 132.4, 132.2, 131.6, 131.5, 130.4, 130.0, 129.6, 129.4, 128.9, 128.8, 128.3, 128.2, 118.6, 113.9, 57.2, 56.4 ppm.  $^{31}\text{P}\{^1\text{H}\}$  NMR (161.9 MHz,  $\text{CDCl}_3$ ):  $\delta_{\text{P}} = 33.1$  ppm.

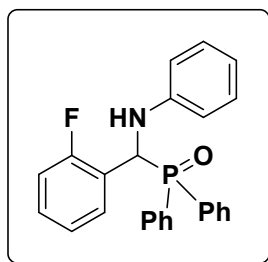

Yield (**4d**): 359 mg, 95%.  $^1\text{H}$  NMR (400 MHz,  $\text{CDCl}_3$ , 25 °C):  $\delta_{\text{H}}$  7.89 - 7.84 (m, 2H, Ar), 7.58 - 7.57 (m, 1H, Ar), 7.53 - 7.47 (m, 5H, Ar), 7.34 - 7.28 (m, 2H, Ar), 7.20 - 7.17 (m, 6H, Ar), 6.97 - 6.92 (m, 1H, Ar), 6.85 - 5.83 (m, 1H, Ar), 6.64 - 6.58 (m, 2H, Ar), 5.26 - 5.20 (m, 2H, CH) ppm.  $^{13}\text{C}\{^1\text{H}\}$  NMR (100 MHz,  $\text{CDCl}_3$ ):  $\delta_{\text{C}}$  150.8, 134.6, 134.5, 132.0, 131.9, 131.7, 131.6, 131.5, 130.4, 129.0, 128.8, 128.3, 128.2, 127.8, 127.4, 127.3, 124.4, 118.6, 114.8, 114.6, 113.8, 57.2, 56.4 ppm.  $^{31}\text{P}\{^1\text{H}\}$  NMR (161.9 MHz,  $\text{CDCl}_3$ ):  $\delta_{\text{P}} = 32.2$  ppm.

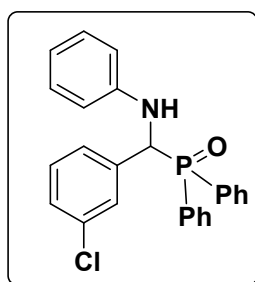

Yield (**4e**): 369 mg, 94%.  $^1\text{H}$  NMR (400 MHz,  $\text{CDCl}_3$ , 25 °C):  $\delta_{\text{H}}$  7.78 - 7.76 (m, 2H, Ar), 7.63 - 7.48 (m, 1H, Ar), 7.43 - 7.30 (m, 4H, Ar), 7.26 - 7.12 (m, 2H, Ar), 7.09 - 6.98 (m, 4H, Ar), 6.67 - 6.59 (m, 1H, Ar), 6.51 - 5.49 (m, 1H, Ar), 5.14 - 5.04 (m, 1H, CH) ppm.  $^{13}\text{C}\{^1\text{H}\}$  NMR (100 MHz,  $\text{CDCl}_3$ ):  $\delta_{\text{C}}$  158.6, 145.8, 145.7, 137.4, 134.1, 132.3, 131.6, 131.5, 131.2, 130.0, 129.4, 129.3, 129.2, 128.9, 128.8, 128.4, 128.2, 127.8, 127.1, 126.3, 120.8, 118.6, 118.5, 115.1, 113.8, 57.5, 56.7 ppm.  $^{31}\text{P}\{^1\text{H}\}$  NMR (161.9 MHz,  $\text{CDCl}_3$ ):  $\delta_{\text{P}} = 33.12$  ppm.

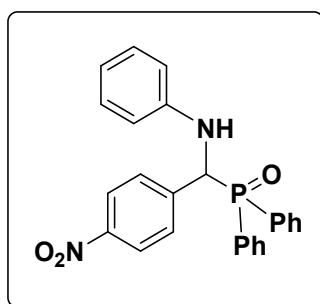

Yield (**4f**): 387 mg, 96%.  $^1\text{H}$  NMR (400 MHz,  $\text{CDCl}_3$ , 25 °C):  $\delta_{\text{H}}$  7.98 - 7.89 (m, 1H, Ar), 7.87 - 7.79 (m, 2H, Ar), 7.67 - 7.56 (m, 2H, Ar), 7.50 - 7.39 (m, 5H, Ar), 7.33 - 7.24 (m, 3H, Ar), 7.16 - 7.02 (m, 3H, Ar), 6.75 - 6.68 (m, 2H, Ar), 6.64 - 6.58 (m, 2H, Ar), 5.44 - 5.29 (m, 2H, CH) ppm.  $^{13}\text{C}\{^1\text{H}\}$  NMR (100 MHz,  $\text{CDCl}_3$ ):  $\delta_{\text{C}}$  158.8, 151.7, 146.3, 134.7, 133.5, 131.6, 131.5, 131.5, 130.9, 130.3, 129.9, 129.6, 129.1, 128.9, 128.8, 128.4, 128.2, 126.2, 120.8, 118.6, 115.1, 113.9, 57.2, 56.4 ppm.  $^{31}\text{P}\{^1\text{H}\}$  NMR (161.9 MHz,  $\text{CDCl}_3$ ):  $\delta_{\text{P}}$  = 33.5 ppm.

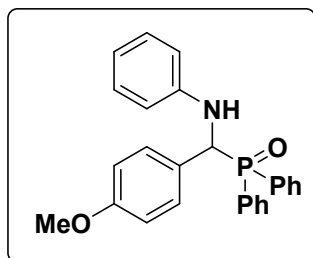

Yield (**4g**): 381 mg, 98%.  $^1\text{H}$  NMR (400 MHz,  $\text{CDCl}_3$ , 25 °C):  $\delta_{\text{H}}$  7.87 - 7.83 (m, 2H, Ar), 7.54 - 7.48 (m, 1H, Ar), 7.47 - 7.39 (m, 4H, Ar), 7.29 - 7.25 (m, 2H, Ar), 7.09 - 7.05 (m, 4H, Ar), 6.68 - 6.58 (m, 5H, Ar), 5.13 (s, 2H, CH), 3.70 (s, 3H,  $\text{OCH}_3$ ) ppm.  $^{13}\text{C}\{^1\text{H}\}$  NMR (100 MHz,  $\text{CDCl}_3$ ):  $\delta_{\text{C}}$  162.2, 159.6, 152.4, 131.9, 131.7, 131.6, 130.5, 129.5, 129.3, 129.2, 129.1, 128.8, 128.1, 125.5, 120.8, 118.3, 115.1, 114.3, 114.0, 113.7, 55.4, 55.1, ppm.  $^{31}\text{P}\{^1\text{H}\}$  NMR (161.9 MHz,  $\text{CDCl}_3$ ):  $\delta_{\text{P}}$  = 33.03 ppm.

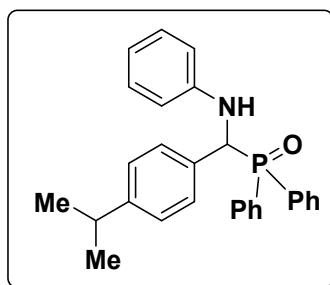

Yield (**4h**): 380 mg, 95%.  $^1\text{H}$  NMR (400 MHz,  $\text{CDCl}_3$ , 25 °C):  $\delta_{\text{H}}$  7.92 - 7.87 (m, 2H Ar), 7.54 - 7.50 (m, 3H Ar), 7.42 - 7.35 (m, 2H Ar), 7.28 - 7.26 (m, 3H Ar), 7.13 - 7.06 (m, 4H Ar), 7.00 - 6.96 (m, 2H Ar), 6.71 - 6.63 (m, 2H Ar), 5.21 - 5.18 (m, 1H, CH), 2.82 - 2.77 (m, 1H,  $(\text{CH}_3)_2\text{CH}$ ), 1.18 - 1.16 (dd,  $J$  = 5.5 Hz, 6H,  $\text{CH}_3$ ) ppm.  $^{13}\text{C}\{^1\text{H}\}$  NMR (100 MHz,  $\text{CDCl}_3$ ):  $\delta_{\text{C}}$  148.4, 148.3, 146.1, 132.2, 131.8, 131.7, 131.6, 130.5, 129.1, 128.8, 128.7, 128.2, 128.0, 127.9, 126.2, 113.9, 57.4, 56.6, 33.9, 23.8, ppm.  $^{31}\text{P}\{^1\text{H}\}$  NMR (161.9 MHz,  $\text{CDCl}_3$ ):  $\delta_{\text{P}}$  = 33.51 ppm.

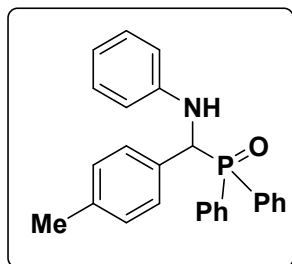

Yield (**4i**): 359 mg, 96%.  $^1\text{H}$  NMR (400 MHz,  $\text{CDCl}_3$ , 25  $^\circ\text{C}$ ):  $\delta_{\text{H}}$  7.91 - 7.86 (m, 2H, Ar), 7.48 - 7.43 (m, 1H, Ar), 7.31 - 7.28 (m, 5H, Ar), 7.27 - 7.25 (m, 2H, Ar), 7.10 - 7.08 (m, 4H, Ar), 7.05 - 7.04 (m, 2H, Ar), 6.96 - 6.94 (m, 1H, Ar), 6.63 - 6.61 (m, 2H, Ar), 5.22 - 5.13 (m, 2H, CH), 2.25 (s, 3H,  $\text{CH}_3$ ) ppm.  $^{13}\text{C}\{^1\text{H}\}$  NMR (100 MHz,  $\text{CDCl}_3$ ):  $\delta_{\text{C}}$  146.2, 137.3, 132.2, 131.7, 131.6, 131.4, 129.1, 128.9, 128.3, 128.2, 118.3, 113.9, 57.4, 56.7, 21.1 ppm.  $^{31}\text{P}\{^1\text{H}\}$  NMR (161.9 MHz,  $\text{CDCl}_3$ ):  $\delta_{\text{P}}$  = 32.87 ppm.

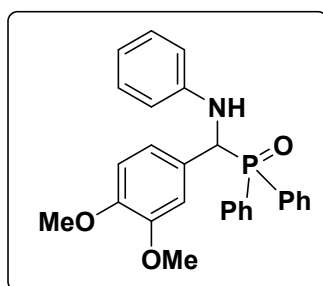

Yield (**4j**): 392 mg, 94%.  $^1\text{H}$  NMR (400 MHz,  $\text{CDCl}_3$ , 25  $^\circ\text{C}$ ):  $\delta_{\text{H}}$  7.92 - 7.87 (m, 2H, Ar), 7.59 - 7.57 (m, 1H, Ar), 7.51 - 7.42 (m, 4H, Ar), 7.34 - 7.28 (m, 2H, Ar), 7.19 - 7.09 (m, 2H, Ar), 6.78 - 6.60 (m, 6H, Ar), 5.18 - 5.13 (m, 2H, CH), 3.80 (s, 3H,  $\text{OCH}_3$ ), 3.64 (s, 3H,  $\text{OCH}_3$ ) ppm.  $^{13}\text{C}\{^1\text{H}\}$  NMR (100 MHz,  $\text{CDCl}_3$ ):  $\delta_{\text{C}}$  148.6, 148.4, 146.2, 146.1, 132.3, 131.8, 131.7, 131.6, 129.2, 129.1, 128.8, 128.7, 128.2, 128.1, 127.1, 120.8, 118.4, 115.1, 114.0, 11.3, 110.7, 57.4, 56.7, 55.7 ppm.  $^{31}\text{P}\{^1\text{H}\}$  NMR (161.9 MHz,  $\text{CDCl}_3$ ):  $\delta_{\text{P}}$  = 32.28 ppm.

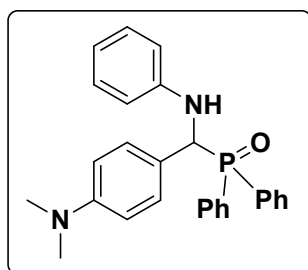

Yield (**4k**): 358 mg, 92%.  $^1\text{H}$  NMR (400 MHz,  $\text{CDCl}_3$ , 25  $^\circ\text{C}$ ):  $\delta_{\text{H}}$  7.39 - 7.36 (m, 2H, Ar), 7.27 - 7.17 (m, 5H, Ar), 7.14 - 7.11 (m, 5H, Ar), 6.89 - 6.87 (m, 2H, Ar), 6.71 - 6.64 (m, 5H, Ar), 5.08 - 5.02 (m, 1H, CH), 2.89 (s, 6H,  $\text{N}(\text{CH}_3)_2$ ) ppm.  $^{13}\text{C}\{^1\text{H}\}$  NMR (100 MHz,  $\text{CDCl}_3$ ):  $\delta_{\text{C}}$  150.6, 150.5, 150.3, 146.2, 146.1, 129.6,

129.5, 129.2, 129.0, 125.2, 125.1, 120.8, 120.7, 118.6, 115.5, 114.1, 113.0, 112.9, 56.2, 54.7, 40.6 ppm.

$^{31}\text{P}\{^1\text{H}\}$  NMR (161.9 MHz,  $\text{CDCl}_3$ ):  $\delta_{\text{P}} = 33.0$  ppm.

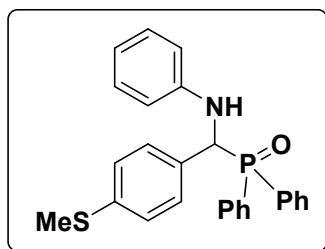

Yield (**4l**): 396 mg, 98%.  $^1\text{H}$  NMR (400 MHz,  $\text{CDCl}_3$ , 25 °C):  $\delta_{\text{H}}$  7.87 - 7.79 (m, 2H, Ar), 7.47 - 7.43 (m, 1H, Ar), 7.42 - 7.40 (m, 5H, Ar), 7.31 - 7.25 (m, 3H, Ar), 6.69 - 6.65 (m, 1H, Ar), 5.16 - 5.14 (m, 2H, CH), 2.38 (s, 3H,  $\text{SCH}_3$ ) ppm.  $^{13}\text{C}\{^1\text{H}\}$  NMR (100 MHz,  $\text{CDCl}_3$ ):  $\delta_{\text{C}}$  159.6, 146.0, 145.9, 137.9, 132.3, 132.0, 131.8, 131.7, 131.6, 129.1, 128.8, 128.7, 128.3, 128.1, 125.8, 125.7, 120.9, 125.1, 120.8, 118.4, 113.9, 57.3, 56.5, 15.6, 15.12 ppm.  $^{31}\text{P}\{^1\text{H}\}$  NMR (161.9 MHz,  $\text{CDCl}_3$ ):  $\delta_{\text{P}} = 32.9$  ppm.

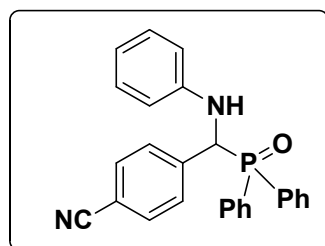

Yield (**4m**): 340 mg, 86%.  $^1\text{H}$  NMR (400 MHz,  $\text{CDCl}_3$ , 25 °C):  $\delta_{\text{H}}$  8.45 (s, 1H, Ar), 7.97 - 7.95 (m, 3H, Ar), 7.71 - 7.69 (m, 3H, Ar), 7.40 - 7.38 (m, 3H, Ar), 7.23 - 7.21 (m, 4H, Ar), 6.66 - 6.64 (m, 1H, CH), ppm.  $^{13}\text{C}\{^1\text{H}\}$  NMR (100 MHz,  $\text{CDCl}_3$ ):  $\delta_{\text{C}}$  157.9, 151.0, 139.9, 132.5, 129.3, 129.1, 126.9, 121.0, 118.5, 118.4, 115.8, 115.1, 114.3, ppm.  $^{31}\text{P}\{^1\text{H}\}$  NMR (161.9 MHz,  $\text{CDCl}_3$ ):  $\delta_{\text{P}} = -19.89$  ppm.

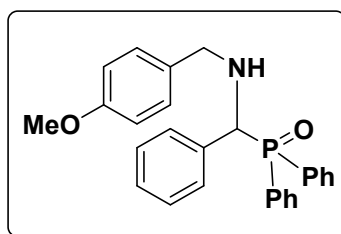

Yield (**4n**): 386 mg, 96%.  $^1\text{H}$  NMR (400 MHz,  $\text{CDCl}_3$ , 25 °C):  $\delta_{\text{H}}$  7.81 - 7.77 (m, 2H, Ar), 7.56 - 7.54 (m, 1H, Ar), 7.47 - 7.42 (m, 4H, Ar), 7.26 - 7.20 (m, 6H, Ar), 7.06 - 7.04 (m, 1H, Ar), 6.85 - 6.83 (m, 1H, Ar), 4.40 - 4.37 (m, 1H, Ar), 3.82 (s, 1H,  $\text{CH}_3$ ), 3.47 - 3.44 (m, 1H, CH) ppm.  $^{13}\text{C}\{^1\text{H}\}$  NMR (100 MHz,  $\text{CDCl}_3$ ):  $\delta_{\text{C}}$  158.7, 135.0, 132.0, 131.8, 131.5, 131.4, 129.9, 129.2, 128.4, 128.2, 128.0, 127.9, 127.7, 127.6, 61.2, 60.4, 55.1, 50.3, 50.2 ppm.  $^{31}\text{P}\{^1\text{H}\}$  NMR (161.9 MHz,  $\text{CDCl}_3$ ):  $\delta_{\text{P}} = 31.88$  ppm.

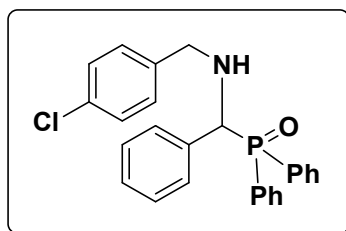

Yield (**4o**): 374 mg, 92%.  $^1\text{H}$  NMR (400 MHz,  $\text{CDCl}_3$ , 25  $^\circ\text{C}$ ):  $\delta_{\text{H}}$  7.81 - 7.75 (m, 2H, Ar), 7.58 - 7.76 (m, 1H, Ar), 7.50 - 7.47 (m, 2H, Ar), 7.42 - 7.40 (m, 3H, Ar), 7.25 - 7.20 (m, 6H, Ar), 7.18 - 7.14 (m, 2H, Ar), 7.04 - 7.02 (m, 1H, Ar), 4.30 - 4.27 (m, 1H, CH), 3.79 - 3.76 (m, 1H, CH), 3.47 - 3.44 (m, 1H, CH) ppm.  $^{13}\text{C}\{^1\text{H}\}$  NMR (100 MHz,  $\text{CDCl}_3$ ):  $\delta_{\text{C}}$  137.6, 134.9, 132.8, 132.5, 132.4, 132.1, 132.0, 131.6, 131.4, 131.3, 129.2, 129.0, 128.6, 128.4, 128.4, 128.2, 128.1, 127.9, 127.8, 127.5, 127.4, 61.3, 60.5, 50.1, 50.0 ppm.  $^{31}\text{P}\{^1\text{H}\}$  NMR (161.9 MHz,  $\text{CDCl}_3$ ):  $\delta_{\text{P}}$  = 31.85 ppm.

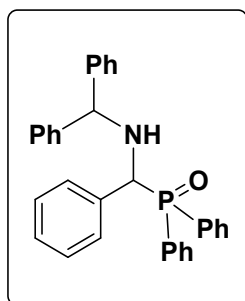

Yield (**4p**): 423 mg, 95%.  $^1\text{H}$  NMR (400 MHz,  $\text{CDCl}_3$ , 25  $^\circ\text{C}$ ):  $\delta_{\text{H}}$  7.86 - 7.81 (m, 2H, Ar), 7.59 (m, 1H, Ar), 7.53 - 7.49 (m, 2H, Ar), 7.40 - 7.28 (m, 6H, Ar), 7.21 - 7.13 (m, 11H, Ar), 7.04 - 7.02 (m, 1H, Ar), 5.59 - 5.48 (m, 1H, Ar), 4.61 (s, 1H, CH), 4.24 - 4.21 (m, 1H, CH), ppm.  $^{13}\text{C}\{^1\text{H}\}$  NMR (100 MHz,  $\text{CDCl}_3$ ):  $\delta_{\text{C}}$  160.9, 143.9, 143.6, 141.9, 136.3, 134.5, 132.4, 132.1, 132.0, 131.9, 131.4, 129.7, 129.2, 129.0, 128.6, 128.4, 128.2, 128.1, 127.9, 127.7, 127.4, 127.0, 64.1, 64.0, 60.4, 59.6, ppm.  $^{31}\text{P}\{^1\text{H}\}$  NMR (161.9 MHz,  $\text{CDCl}_3$ ):  $\delta_{\text{P}}$  = 32.5 ppm.

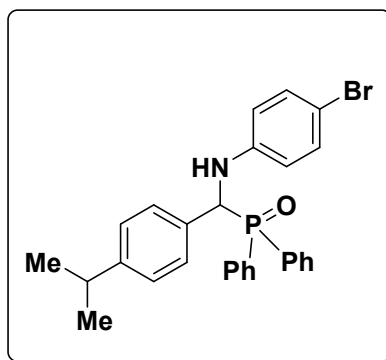

Yield (**4q**): 460 mg, 97%.  $^1\text{H}$  NMR (400 MHz,  $\text{CDCl}_3$ , 25 °C):  $\delta_{\text{H}}$  7.87 - 7.84 (m, 2H, Ar), 7.59 - 7.57 (m, 2H, Ar), 7.44 - 7.40 (m, 1H, Ar), 7.35 - 7.25 (m, 3H, Ar), 7.18 - 7.06 (m, 2H, Ar), 7.04 - 6.97 (m, 3H, Ar), 6.51 - 6.49 (m, 2H, Ar), 5.12 - 5.07 (m, 1H, CH), 2.85 - 2.77 (m, 1H,  $(\text{CH}_3)_2\text{CH}$ ), 1.22 - 1.16 (m, 6H,  $\text{CH}_3$ ) ppm.  $^{13}\text{C}\{^1\text{H}\}$  NMR (100 MHz,  $\text{CDCl}_3$ ):  $\delta_{\text{C}}$  148.6, 145.2, 131.9, 131.7, 131.6, 128.8, 128.7, 128.2, 128.0, 127.9, 126.2, 115.5, 110.0, 57.4, 56.6, 33.7, 23.9 ppm.  $^{31}\text{P}\{^1\text{H}\}$  NMR (161.9 MHz,  $\text{CDCl}_3$ ):  $\delta_{\text{P}}$  = 33.44 ppm.

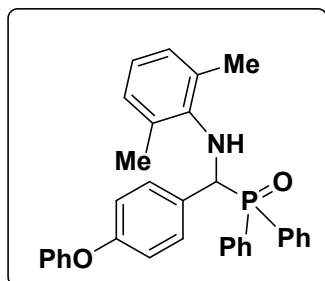

Yield (**4r**): 455 mg, 96%.  $^1\text{H}$  NMR (400 MHz,  $\text{CDCl}_3$ , 25 °C):  $\delta_{\text{H}}$  7.92 - 7.87 (m, 3H, Ar), 7.53 - 7.51 (m, 3H, Ar), 7.45 - 7.34 (m, 3H, Ar), 7.34 - 7.26 (m, 4H, Ar), 7.14 - 7.06 (m, 3H, Ar), 6.83 - 6.79 (m, 4H, Ar), 6.72 - 6.89 (m, 3H, Ar), 5.08 (s, 1H, CH), 2.09 (s, 6H,  $\text{CH}_3$ ) ppm.  $^{13}\text{C}\{^1\text{H}\}$  NMR (100 MHz,  $\text{CDCl}_3$ ):  $\delta_{\text{C}}$  150.6, 150.5, 150.3, 146.2, 146.1, 129.6, 129.5, 129.2, 129.0, 125.2, 125.1, 120.8, 120.7, 118.6, 115.5, 114.1, 113.0, 112.9, 56.2, 54.7, 40.6 ppm.  $^{31}\text{P}\{^1\text{H}\}$  NMR (161.9 MHz,  $\text{CDCl}_3$ ):  $\delta_{\text{P}}$  = 33.59 ppm.

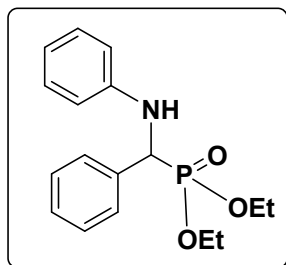

Yield (**5a**): 285 mg, 95%.  $^1\text{H}$  NMR (400 MHz,  $\text{CDCl}_3$ , 25 °C):  $\delta_{\text{H}}$  7.52 - 7.50 (m, 2H, Ar), 7.38 - 7.34 (m, 2H Ar), 7.31 - 7.28 (m, 1H, Ar), 7.15 - 7.11 (m, 2H, Ar), 6.73 - 6.70 (m, 1H, Ar), 6.64 - 6.62 (m, 2H, Ar), 4.83 - 4.77 (m, 1H, CH), 4.17 - 4.11 (m, 2H,  $\text{CH}_2$ ), 3.98 - 3.93 (m, 1H,  $\text{CH}_2$ ), 3.73 - 3.67 (m, 1H,  $\text{CH}_2$ ), 1.33 - 1.29 (m, 3H,  $\text{CH}_3$ ), 1.16 - 1.12 (m, 3H,  $\text{CH}_3$ ), ppm.  $^{13}\text{C}\{^1\text{H}\}$  NMR (100 MHz,  $\text{CDCl}_3$ ):  $\delta_{\text{C}}$  146.4, 146.2, 135.9, 129.1, 128.6, 128.5, 127.9, 127.8, 118.4, 113.8, 63.3, 62.2, 56.8, 55.3, ppm.  $^{31}\text{P}\{^1\text{H}\}$  NMR (161.9 MHz,  $\text{CDCl}_3$ ):  $\delta_{\text{P}}$  = 22.7 ppm.

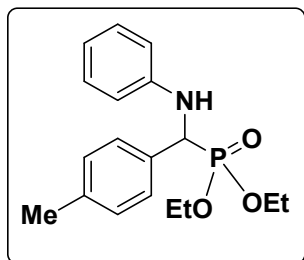

Yield (**5b**): 292 mg, 93%.  $^1\text{H}$  NMR (400 MHz,  $\text{CDCl}_3$ , 25 °C):  $\delta_{\text{H}}$  7.26 - 7.24 (m, 2H Ar), 6.98 - 6.92 (m, 4H Ar), 6.51 - 6.47 (m, 3H Ar), 4.67 - 4.61 (m, 1H CH), 4.01 - 3.95 (m, 2H,  $\text{CH}_2$ ), 3.93 - 3.78 (m, 1H,  $\text{CH}_2$ ), 3.78 - 3.54 (m, 1H,  $\text{CH}_2$ ), 2.13 (s, 3H,  $\text{CH}_3$ ), 1.13 - 1.10 (m, 3H,  $\text{CH}_3$ ), 0.98 - 0.94 (m, 3H,  $\text{CH}_3$ ) ppm.  $^{13}\text{C}\{^1\text{H}\}$  NMR (100 MHz,  $\text{CDCl}_3$ ):  $\delta_{\text{C}}$  146.4, 146.3, 136.4, 136.3, 134.3, 134.2, 130.5, 129.2, 128.6, 128.9, 127.7, 127.2, 127.1, 126.5, 118.2, 113.8, 113.5, 63.3, 63.1, 52.8, 51.3, 19.7, 16.5, 14.2 ppm.  $^{31}\text{P}\{^1\text{H}\}$  NMR (161.9 MHz,  $\text{CDCl}_3$ ):  $\delta_{\text{P}}$  = 22.9 ppm.

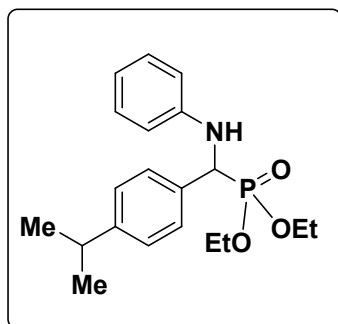

Yield (**5c**): 326 mg, 96%.  $^1\text{H}$  NMR (400 MHz,  $\text{CDCl}_3$ , 25 °C):  $\delta_{\text{H}}$  7.30 - 7.28 (m, 2H Ar), 7.04 - 7.02 (m, 2H, Ar), 6.95 - 6.91 (m, 2H, Ar), 6.52 - 6.49 (m, 3H, Ar), 4.69 - 4.62 (m, 1H, CH), 4.01 - 3.93 (m, 2H,  $\text{CH}_2$ ), 3.79 - 3.77 (m, 1H,  $\text{CH}_2$ ), 3.56 - 3.50 (m, 1H,  $\text{CH}_2$ ), 2.74 - 2.68 (s, 1H,  $(\text{CH}_3)_2\text{CH}$ ), 1.17 - 1.08 (m, 3H,  $\text{CH}_3$ ), 1.07 - 1.05 (dd,  $J$  = 6.9 Hz, 6H,  $(\text{CH}_3)_2$ ), 0.94 - 0.91 (m, 3H,  $\text{CH}_3$ ) ppm.  $^{13}\text{C}\{^1\text{H}\}$  NMR (100 MHz,  $\text{CDCl}_3$ ):  $\delta_{\text{C}}$  148.4, 146.7, 146.7, 146.5, 133.2, 129.0, 128.6, 128.9, 127.7, 127.2, 127.1, 126.5, 118.2, 113.8, 113.5, 63.3, 63.1, 56.3, 54.8, 33.7, 23.9, 16.4, 16.3, 16.1 ppm.  $^{31}\text{P}\{^1\text{H}\}$  NMR (161.9 MHz,  $\text{CDCl}_3$ ):  $\delta_{\text{P}}$  = 23.0 ppm.

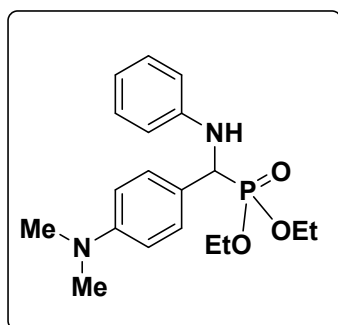



Yield (**5d**): 334 mg, 98%.  $^1\text{H}$  NMR (400 MHz,  $\text{CDCl}_3$ , 25 °C):  $\delta_{\text{H}}$  7.36 - 7.33 (m, 2H, Ar), 7.14 - 7.10 (m, 2H, Ar), 6.72 - 6.70 (m, 3H, Ar), 6.65 - 6.63 (m, 2H, Ar), 4.73 - 4.68 (m, 1H, CH), 4.17 - 4.13 (m, 2H,  $\text{CH}_2$ ), 4.12 - 3.94 (m, 1H,  $\text{CH}_2$ ), 2.93 (s, 6H,  $\text{N}(\text{CH}_3)_2$ ), 1.33 - 1.29 (m, 3H,  $\text{CH}_3$ ), 1.18 - 1.15 (m, 3H,  $\text{CH}_3$ ) ppm.  $^{13}\text{C}\{^1\text{H}\}$  NMR (100 MHz,  $\text{CDCl}_3$ ):  $\delta_{\text{C}}$  150.1, 146.7, 146.5, 129.1, 128.6, 123.7, 118.1, 113.9, 112.6, 63.2, 63.1, 56.1, 54.6, 40.5, 16.5, 16.3 ppm.  $^{31}\text{P}\{^1\text{H}\}$  NMR (161.9 MHz,  $\text{CDCl}_3$ ):  $\delta_{\text{P}}$  = 23.4 ppm.

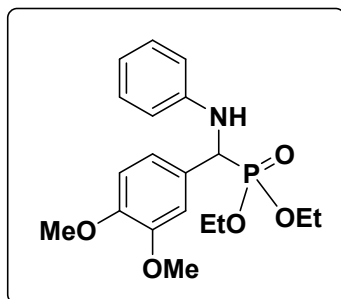

Yield (**5e**): 343 mg, 96%.  $^1\text{H}$  NMR (400 MHz,  $\text{CDCl}_3$ , 25 °C):  $\delta_{\text{H}}$  7.06 - 7.01 (m, 3H, Ar), 6.74 - 6.72 (m, 1H, Ar), 6.65 - 6.56 (m, 3H, Ar), 4.74 - 4.68 (m, 1H, CH), 4.09 - 4.01 (m, 2H,  $\text{CH}_2$ ), 3.92 - 3.78 (m, 1H,  $\text{CH}_2$ ), 3.75 (s, 3H,  $\text{OCH}_3$ ), 3.71 (s, 3H,  $\text{OCH}_3$ ), 1.94 (s, 3H,  $\text{CH}_3$ ), 1.27 - 1.21 (m, 3H,  $\text{CH}_3$ ), 1.09 - 1.06 (m, 3H,  $\text{CH}_3$ ) ppm.  $^{13}\text{C}\{^1\text{H}\}$  NMR (100 MHz,  $\text{CDCl}_3$ ):  $\delta_{\text{C}}$  170.8, 149.0, 148.7, 146.8, 146.6, 129.0, 128.2, 128.9, 120.3, 120.2, 118.2, 117.9, 117.0, 114.9, 113.8, 112.7, 111.1, 111.0, 63.1, 61.6, 60.2, 56.3, 55.7, 55.6, 54.8, 20.8, 16.4, 16.2, 14.6 ppm.  $^{31}\text{P}\{^1\text{H}\}$  NMR (161.9 MHz,  $\text{CDCl}_3$ ):  $\delta_{\text{P}}$  = 22.8 ppm.

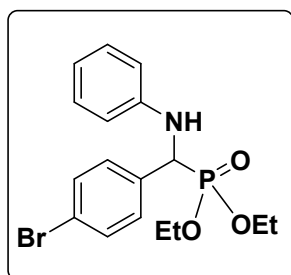

Yield (**5f**): 352 mg, 94%.  $^1\text{H}$  NMR (400 MHz,  $\text{CDCl}_3$ , 25 °C):  $\delta_{\text{H}}$  7.81 - 7.79 (m, 1H, Ar), 7.53 - 7.35 (m, 3H, Ar), 7.30 - 7.21 (m, 2H, Ar), 6.96 - 6.92 (m, 1H, Ar), 6.51 - 6.43 (m, 1H, Ar), 4.85 - 4.79 (m, 1H, CH), 4.13 - 3.94 (m, 1H,  $\text{CH}_2$ ), 3.79 - 3.73 (m, 1H,  $\text{CH}_2$ ), 1.30 - 1.20 (m, 3H,  $\text{CH}_3$ ), 1.13 - 1.10 (m, 3H,  $\text{CH}_3$ ) ppm.  $^{13}\text{C}\{^1\text{H}\}$  NMR (100 MHz,  $\text{CDCl}_3$ ):  $\delta_{\text{C}}$  143.3, 143.1, 132.3, 128.9, 128.6, 128.3, 127.7, 127.6, 119.0, 112.7, 110.4, 63.5, 63.4, 63.3, 56.7, 55.2, 16.4, 16.3, 16.2, 16.1 ppm.  $^{31}\text{P}\{^1\text{H}\}$  NMR (161.9 MHz,  $\text{CDCl}_3$ ):  $\delta_{\text{P}}$  = 21.7 ppm.

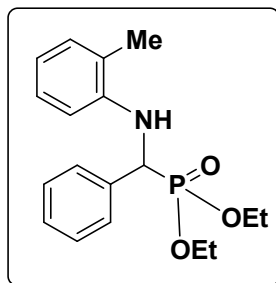

Yield (**5g**): 285 mg, 93%.  $^1\text{H}$  NMR (400 MHz,  $\text{CDCl}_3$ , 25 °C):  $\delta_{\text{H}}$  7.43 - 7.42 (m, 1H, Ar), 7.03 - 7.02 (m, 2H, Ar), 6.98 - 6.94 (m, 3H, Ar), 6.56 - 6.52 (m, 1H, Ar), 6.44 - 6.42 (m, 2H, Ar), 4.93 - 4.86 (m, 2H, CH), 4.07 - 3.98 (m, 2H,  $\text{CH}_2$ ), 3.79 - 3.73 (m, 1H,  $\text{CH}_2$ ), 3.44 - 3.39 (m, 1H,  $\text{CH}_2$ ), 2.41 (s, 3H,  $\text{CH}_3$ ), 1.19 - 1.15 (m, 3H,  $\text{CH}_3$ ), 0.94 - 0.90 (m, 3H,  $\text{CH}_3$ ), ppm.  $^{13}\text{C}\{^1\text{H}\}$  NMR (100 MHz,  $\text{CDCl}_3$ ):  $\delta_{\text{C}}$  146.6, 146.5, 137.4, 132.9, 129.2, 129.1, 127.9, 127.8, 118.2, 113.8, 63.2, 63.1, 60.3, 56.4, 54.9, 21.1, 20.9, 16.4, 16.2, 14.2 ppm.  $^{31}\text{P}\{^1\text{H}\}$  NMR (161.9 MHz,  $\text{CDCl}_3$ ):  $\delta_{\text{P}}$  = 23.5 ppm.

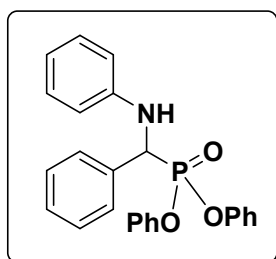

Yield (**6a**): 375 mg, 96%.  $^1\text{H}$  NMR (400 MHz,  $\text{CDCl}_3$ , 25 °C):  $\delta_{\text{H}}$  7.33 - 7.22 (m, 8H, Ar), 7.18 - 7.14 (m, 4H, Ar), 7.10 - 7.07 (m, 2H, Ar), 6.56 - 6.87 (m, 4H, Ar), 6.79 - 6.75 (m, 1H, Ar), 6.65 - 6.63 (m, 1H, Ar), 5.15 - 5.09 (m, 1H, CH) ppm.  $^{13}\text{C}\{^1\text{H}\}$  NMR (100 MHz,  $\text{CDCl}_3$ ):  $\delta_{\text{C}}$  157.5, 156.9, 150.3, 150.2, 145.8, 145.6, 136.9, 130.2, 129.3, 125.4, 125.3, 123.3, 123.0, 122.9, 120.6, 120.3, 120.2, 119.0, 119.3, 118.7, 118.6, 114.1, 56.7, 55.1 ppm.  $^{31}\text{P}\{^1\text{H}\}$  NMR (161.9 MHz,  $\text{CDCl}_3$ ):  $\delta_{\text{P}}$  = 14.8 ppm.

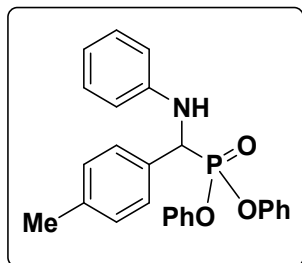

Yield (**6b**): 368 mg, 91%.  $^1\text{H}$  NMR (400 MHz,  $\text{CDCl}_3$ , 25 °C):  $\delta_{\text{H}}$  7.43 - 7.41 (m, 2H, Ar), 7.25 - 7.18 (m, 3H, Ar), 7.12 - 7.18 (m, 7H, Ar), 6.87 - 6.85 (m, 2H, Ar), 6.72 - 6.69 (m, 1H, Ar), 6.64 - 6.62 (m, 2H, Ar), 5.14 - 5.08 (m, 1H, CH), 2.28 (s, 1H,  $\text{CH}_3$ ) ppm.  $^{13}\text{C}\{^1\text{H}\}$  NMR (100 MHz,  $\text{CDCl}_3$ ):  $\delta_{\text{C}}$  150.4, 150.3, 150.2,

146.1, 145.9, 136.6, 133.3, 130.8, 129.8, 129.6, 129.3, 128.2, 127.7, 127.6, 126.8, 125.5, 125.2, 120.8, 120.2, 118.8, 113.8, 52.7, 51.2, 19.8 ppm.  $^{31}\text{P}\{^1\text{H}\}$  NMR (161.9 MHz,  $\text{CDCl}_3$ ):  $\delta_{\text{P}} = 15.6$  ppm.

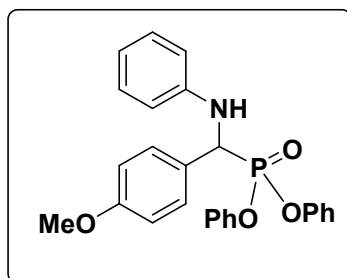

Yield (**6c**): 398 mg, 95%.  $^1\text{H}$  NMR (400 MHz,  $\text{CDCl}_3$ , 25 °C):  $\delta_{\text{H}}$  7.55 - 7.53 (m, 2H Ar), 7.34 - 7.27 (m, 6H, Ar), 7.25 - 7.15 (m, 6H, Ar), 7.06 - 7.02 (m, 1H, Ar), 6.97 - 6.91 (m, 4H, Ar), 6.82 - 6.27 (m, 1H, Ar), 5.22 - 5.16 (m, 1H, CH), 3.80 (s, 3H,  $\text{OCH}_3$ ) ppm.  $^{13}\text{C}\{^1\text{H}\}$  NMR (100 MHz,  $\text{CDCl}_3$ ):  $\delta_{\text{C}}$  159.7, 156.6, 151.2, 150.4, 150.2, 146.0, 145.9, 132.0, 129.8, 129.6, 129.4, 129.3, 126.5, 125.3, 125.3, 122.3, 120.8, 120.7, 120.5, 120.4, 119.7, 118.8, 115.5, 114.3, 114.1, 113.8, 56.8, 55.2, 54.6 ppm.  $^{31}\text{P}\{^1\text{H}\}$  NMR (161.9 MHz,  $\text{CDCl}_3$ ):  $\delta_{\text{P}} = 15.68$  ppm.

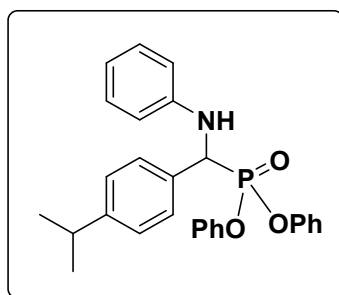

Yield (**6d**): 387 mg, 90%.  $^1\text{H}$  NMR (400 MHz,  $\text{CDCl}_3$ , 25 °C):  $\delta_{\text{H}}$  7.46 - 7.43 (m, 2H Ar), 7.25 - 7.15 (m, 2H, Ar), 7.12 - 7.10 (m, 5H, Ar), 7.10 - 7.06 (m, 3H, Ar), 6.78 - 6.70 (m, 2H, Ar), 6.66 - 6.64 (m, 2H, Ar), 5.15 - 5.09 (s, 1H, CH), 2.89 - 2.82 (m, 1H,  $(\text{CH}_3)_2\text{CH}$ ), 1.21 - 1.19 (m, 6H,  $\text{CH}_3$ ), ppm.  $^{13}\text{C}\{^1\text{H}\}$  NMR (100 MHz,  $\text{CDCl}_3$ ):  $\delta_{\text{C}}$  150.4, 150.4, 150.3, 149.2, 149.1, 146.1, 145.9, 131.9, 129.7, 129.5, 129.2, 128.2, 128.1, 126.9, 125.3, 125.1, 120.7, 120.3, 118.7, 114.3, 56.8, 54.6, 33.8, 23.9 ppm.  $^{31}\text{P}\{^1\text{H}\}$  NMR (161.9 MHz,  $\text{CDCl}_3$ ):  $\delta_{\text{P}} = 15.63$  ppm.

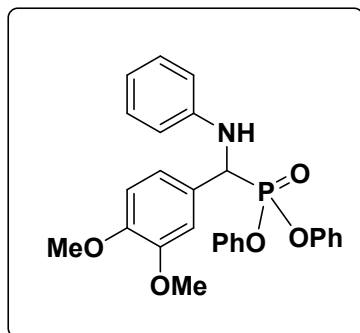

Yield (**6e**): 398 mg, 89%.  $^1\text{H}$  NMR (400 MHz,  $\text{CDCl}_3$ , 25 °C):  $\delta_{\text{H}}$  7.33 - 7.23 (m, 7H Ar), 7.20 - 7.11 (m, 2H, Ar), 7.03 - 6.98 (m, 2H, Ar), 6.94 - 6.92 (m, 2H, Ar), 6.77 - 6.85 (m, 1H, Ar), 6.81 - 6.79 (m, 1H, Ar), 6.72 - 6.70 (m, 1H, Ar), 5.17 - 5.11 (m, 1H, CH), 3.87 (s, 3H,  $\text{OCH}_3$ ), 3.82 (s, 3H,  $\text{OCH}_3$ ) ppm.  $^{13}\text{C}\{^1\text{H}\}$  NMR (100 MHz,  $\text{CDCl}_3$ ):  $\delta_{\text{C}}$  151.3, 150.4, 150.3, 149.2, 149.1, 146.1, 145.9, 133.1, 129.7, 129.6, 129.5, 129.4, 129.3, 127.1, 127.0, 128.2, 125.4, 125.3, 125.2, 123.8, 122.5, 120.8, 120.6, 120.3, 118.9, 115.4, 114.1, 111.3, 111.1, 111.0, 56.6, 55.9, 55.0 ppm.  $^{31}\text{P}\{^1\text{H}\}$  NMR (161.9 MHz,  $\text{CDCl}_3$ ):  $\delta_{\text{P}}$  = 15.46 ppm.

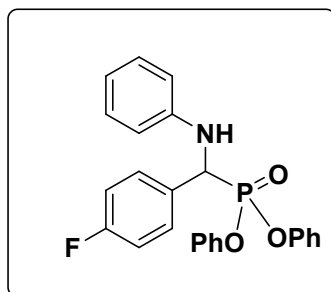

Yield (**6f**): 379 mg, 93%.  $^1\text{H}$  NMR (400 MHz,  $\text{CDCl}_3$ , 25 °C):  $\delta_{\text{H}}$  7.58 (s, 1H, Ar), 7.34 - 7.26 (m, 4H, Ar), 7.22 - 7.12 (m, 5H, Ar), 7.04 - 7.05 (m, 1H, Ar), 6.95 - 6.93 (m, 1H, Ar), 6.82 - 6.78 (m, 1H, Ar), 6.68 - 6.60 (m, 1H, Ar), 5.22 - 5.15 (m, 1H, CH) ppm.  $^{13}\text{C}\{^1\text{H}\}$  NMR (100 MHz,  $\text{CDCl}_3$ ):  $\delta_{\text{C}}$  150.3, 150.2, 145.8, 145.6, 130.6, 129.9, 129.7, 129.3, 125.4, 120.8, 120.6, 120.3, 120.2, 120.8, 120.6, 120.3, 119.0, 115.9, 115.7, 114.0, 56.0, 54.5, ppm.  $^{31}\text{P}\{^1\text{H}\}$  NMR (161.9 MHz,  $\text{CDCl}_3$ ):  $\delta_{\text{P}}$  = 15.02 ppm.

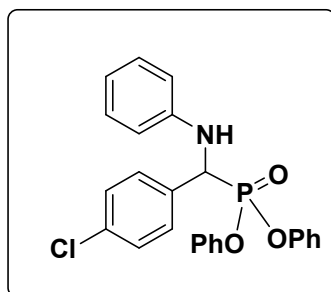

Yield (**6g**): 410 mg, 97%.  $^1\text{H}$  NMR (400 MHz,  $\text{CDCl}_3$ , 25 °C):  $\delta_{\text{H}}$  7.54 - 7.52 (m, 1H, Ar), 7.36 - 7.30 (m, 6H, Ar), 7.28 - 7.13 (m, 6H, Ar), 6.96 - 6.94 (m, 2H, Ar), 6.82 - 6.78 (m, 1H, Ar), 6.66 - 6.64 (m, 1H, Ar),

5.19 - 5.13 (m, 1H, CH) ppm.  $^{13}\text{C}\{^1\text{H}\}$  NMR (100 MHz,  $\text{CDCl}_3$ ):  $\delta_{\text{C}}$  150.3, 150.2, 150.1, 145.7, 145.6, 130.6, 129.9, 129.8, 129.7, 125.5, 120.6, 120.4, 120.3, 120.2, 119.0, 115.4, 114.0, 56.0, 54.6, ppm.  $^{31}\text{P}\{^1\text{H}\}$  NMR (161.9 MHz,  $\text{CDCl}_3$ ):  $\delta_{\text{P}}$  = 15.02 ppm.

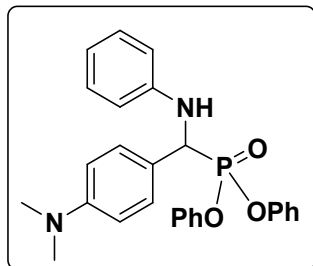

Yield (**6h**): 397 mg, 92%.  $^1\text{H}$  NMR (400 MHz,  $\text{CDCl}_3$ , 25 °C):  $\delta_{\text{H}}$  7.43 - 7.37 (m, 2H, Ar), 7.28 - 7.10 (m, 11H, Ar), 6.92 - 6.90 (m, 1H, Ar), 6.73 - 6.67 (m, 4H, Ar), 5.13 - 5.03 (m, 1H, CH), 2.90 (m, 6H,  $\text{N}(\text{CH}_3)_2$ ), ppm.  $^{13}\text{C}\{^1\text{H}\}$  NMR (100 MHz,  $\text{CDCl}_3$ ):  $\delta_{\text{C}}$  150.4, 150.4, 150.3, 146.1, 145.9, 131.9, 129.7, 129.5, 129.2, 128.2, 126.9, 125.3, 125.1, 120.7, 120.3, 118.7, 114.3, 114.1, 113.8, 56.8, 54.6, 33.8, 23.9 ppm.  $^{31}\text{P}\{^1\text{H}\}$  NMR (161.9 MHz,  $\text{CDCl}_3$ ):  $\delta_{\text{P}}$  = 16.04 ppm.

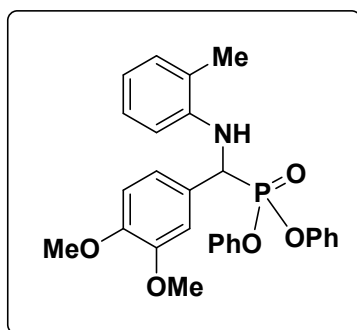

Yield (**6i**): 433 mg, 94%.  $^1\text{H}$  NMR (400 MHz,  $\text{CDCl}_3$ , 25 °C):  $\delta_{\text{H}}$  7.26 - 7.20 (m, 4H, Ar), 7.14 - 7.04 (m, 8H, Ar), 7.01 - 6.99 (m, 1H, Ar), 6.93 - 6.90 (m, 2H, Ar), 6.83 - 6.81 (m, 1H, Ar), 6.71 - 6.69 (m, 1H, Ar), 5.14 - 5.08 (m, 1H, CH), 3.84 (s, 3H,  $\text{OCH}_3$ ), 3.79 (s, 3H,  $\text{OCH}_3$ ), 2.20 (s, 3H,  $\text{CH}_3$ ) ppm.  $^{13}\text{C}\{^1\text{H}\}$  NMR (100 MHz,  $\text{CDCl}_3$ ):  $\delta_{\text{C}}$  150.5, 149.2, 149.1, 144.1, 143.9, 130.3, 129.7, 129.6, 127.0, 120.5, 120.2, 118.6, 111.5, 111.3, 111.0, 56.7, 55.9, 55.2, 17.5 ppm.  $^{31}\text{P}\{^1\text{H}\}$  NMR (161.9 MHz,  $\text{CDCl}_3$ ):  $\delta_{\text{P}}$  = 15.46 ppm.

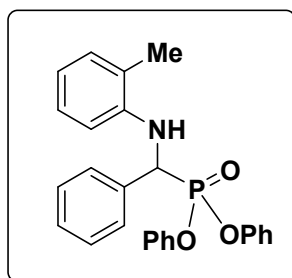

Yield (**6j**): 372 mg, 92%.  $^1\text{H}$  NMR (400 MHz,  $\text{CDCl}_3$ , 25 °C):  $\delta_{\text{H}}$  7.61 - 7.59 (m, 2H, Ar), 7.15 - 7.14 (m, 3H, Ar), 7.11 - 7.09 (m, 7H, Ar), 6.74 - 6.67 (m, 2H, Ar), 6.58 - 6.56 (m, 1H, Ar), 5.42 - 5.36 (m, 1H, CH), 2.51 (s, 3H,  $\text{CH}_3$ ) ppm.  $^{13}\text{C}\{^1\text{H}\}$  NMR (100 MHz,  $\text{CDCl}_3$ ):  $\delta_{\text{C}}$  150.4, 150.3, 150.2, 146.1, 145.9, 136.6, 133.3, 130.8, 129.8, 129.6, 129.3, 128.2, 127.7, 127.6, 126.8, 125.5, 125.2, 120.8, 120.2, 118.8, 113.8, 52.8, 51.2, 19.8 ppm.  $^{31}\text{P}\{^1\text{H}\}$  NMR (161.9 MHz,  $\text{CDCl}_3$ ):  $\delta_{\text{P}}$  = 16.25 ppm.

## 5. NMR data of $\alpha$ -aminophosphine oxides

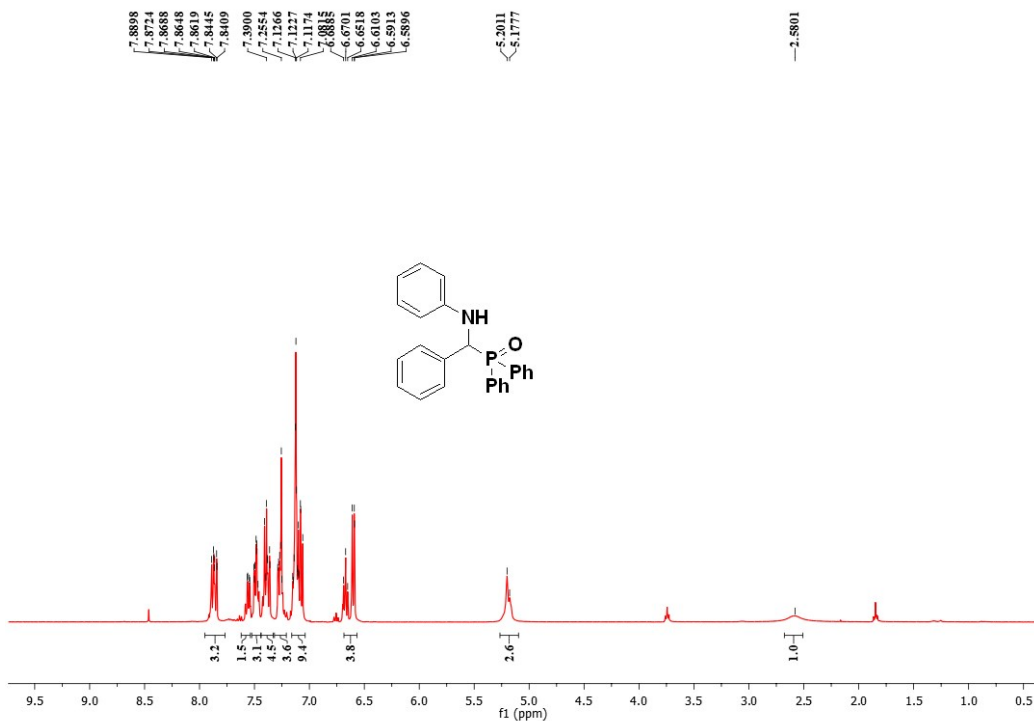

**Fig FS8.**  $^1\text{H}$  NMR for compound **4a** in  $\text{CDCl}_3$ .

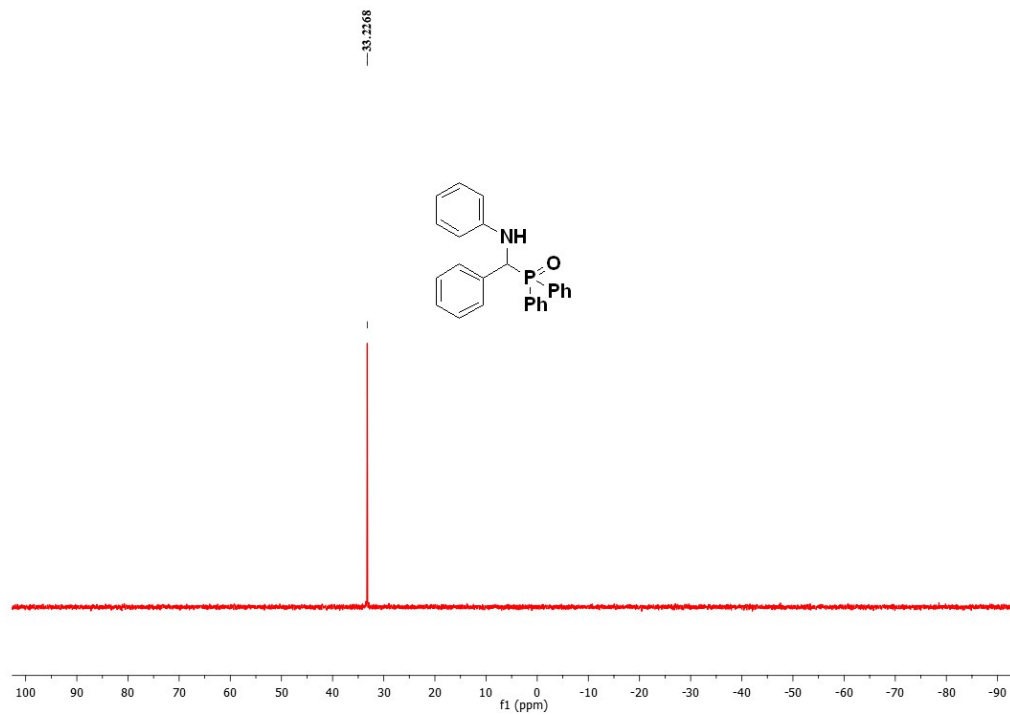

Fig FS9.  $^{31}\text{P}\{^1\text{H}\}$  NMR for compound **4a** in  $\text{CDCl}_3$ .

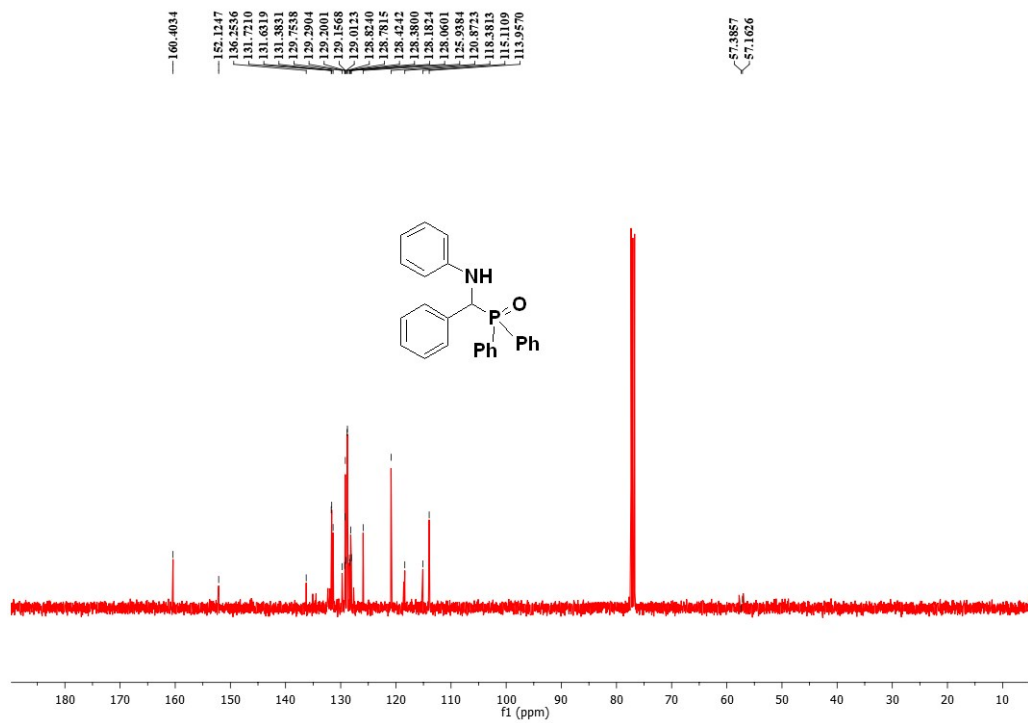

Fig FS10:  $^{13}\text{C}\{^1\text{H}\}$  NMR for compound **4a** in  $\text{CDCl}_3$ .

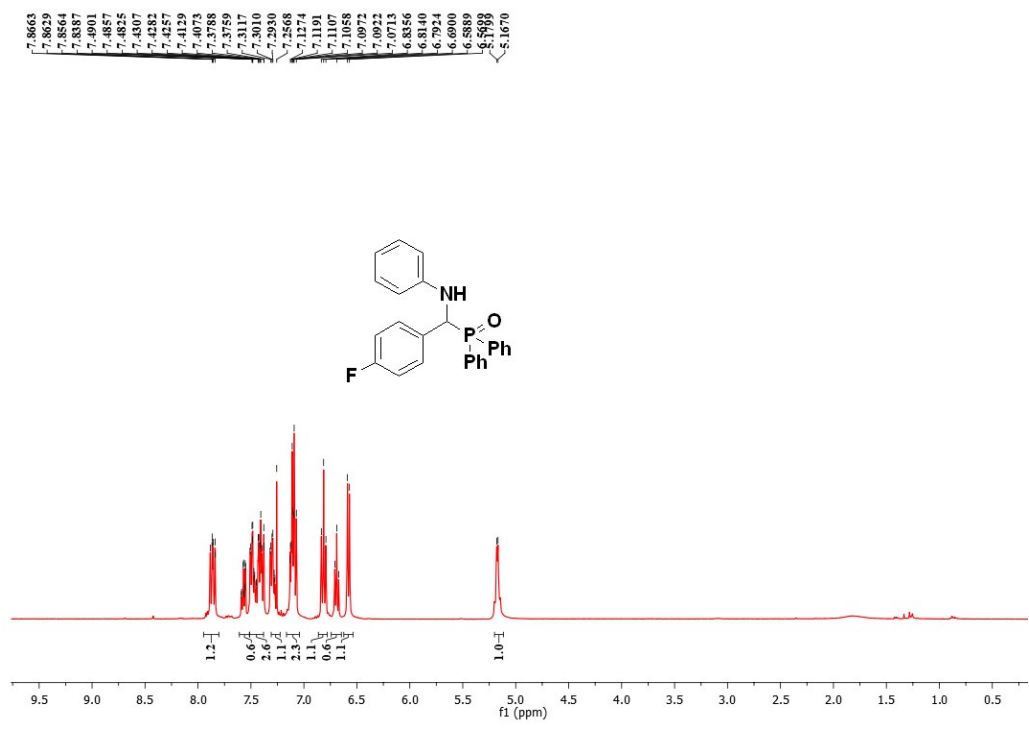

Fig FS11. <sup>1</sup>H NMR for compound **4b** in CDCl<sub>3</sub>.

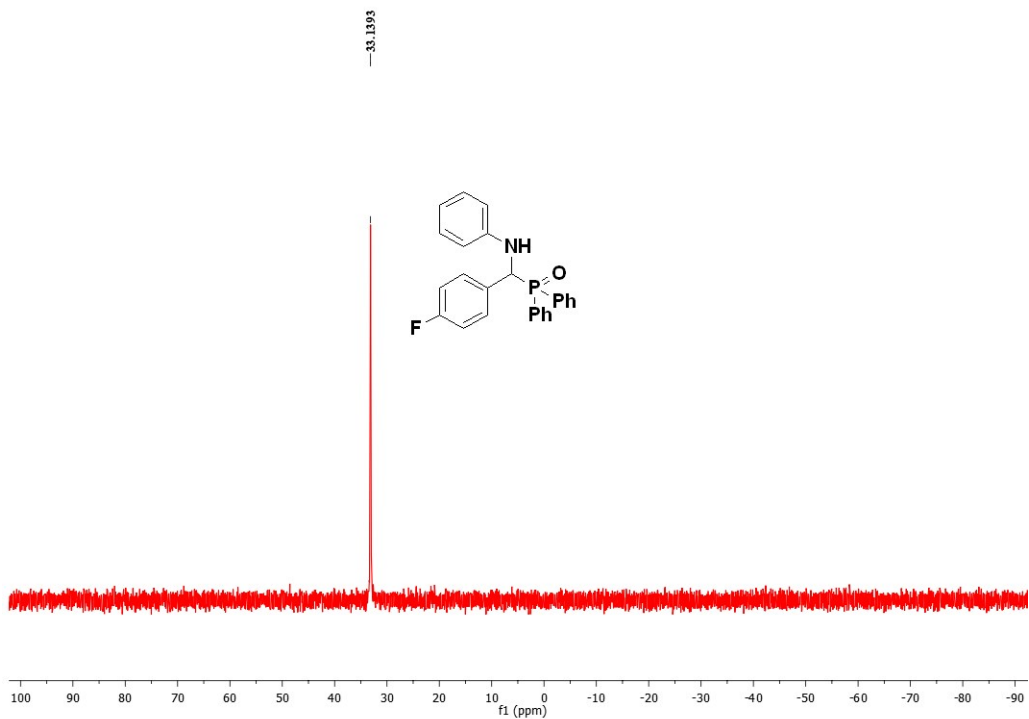

Fig FS12. <sup>31</sup>P{<sup>1</sup>H} NMR for compound **4b** in CDCl<sub>3</sub>.



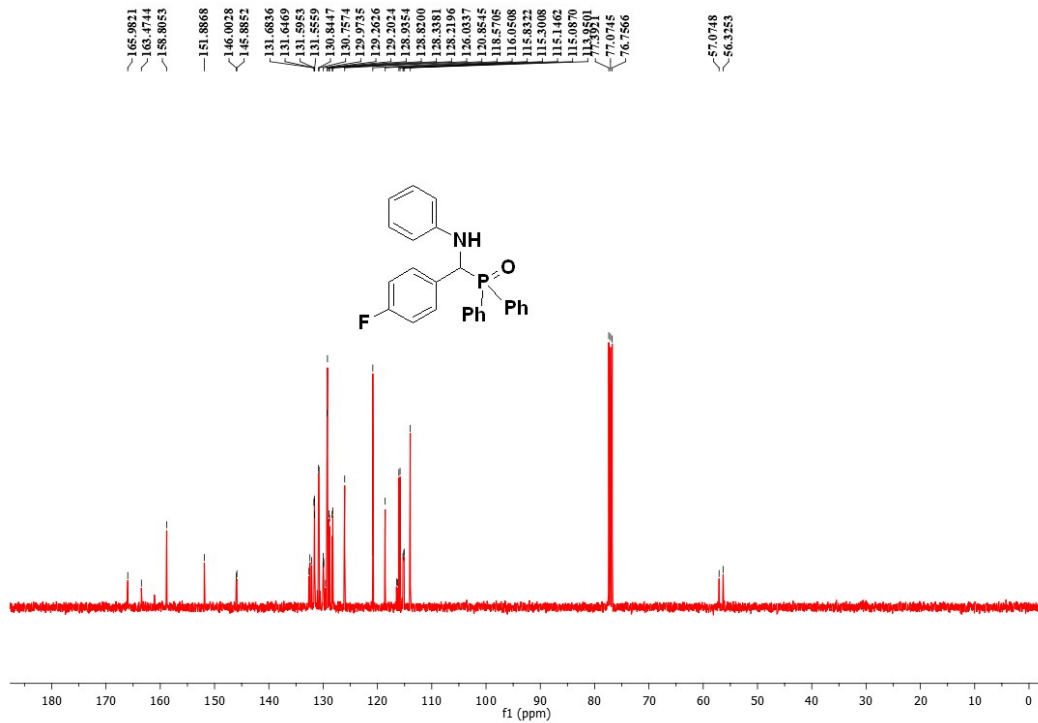

Fig FS13.  $^{13}\text{C}\{^1\text{H}\}$  NMR for compound **4b** in  $\text{CDCl}_3$ .

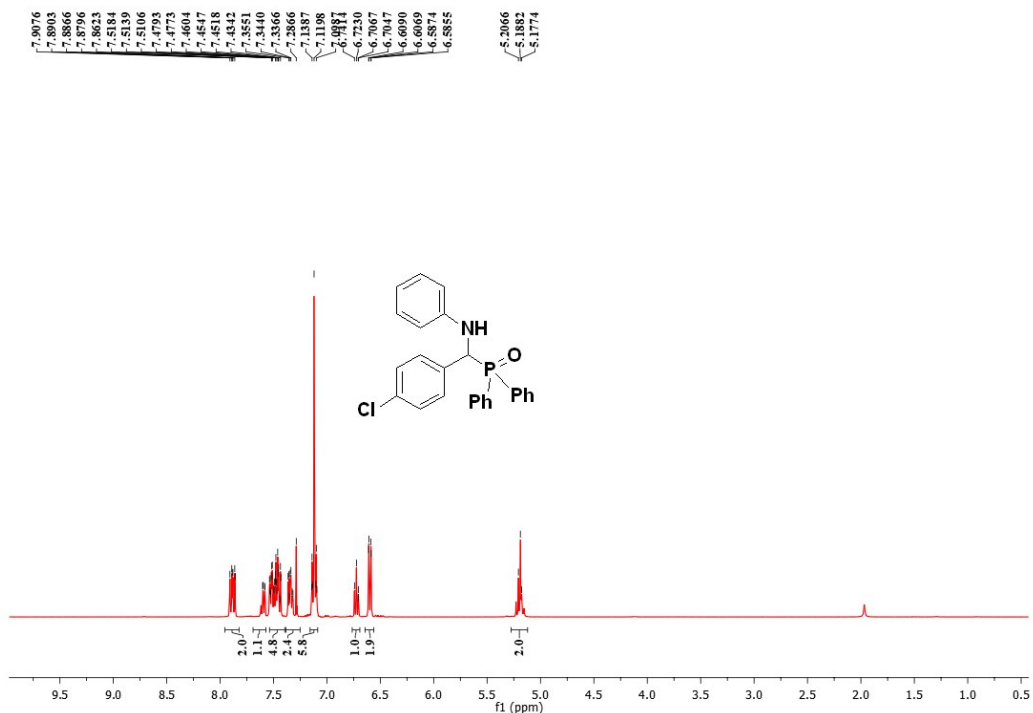

Fig FS14.  $^1\text{H}$  NMR for compound **4c** in  $\text{CDCl}_3$ .

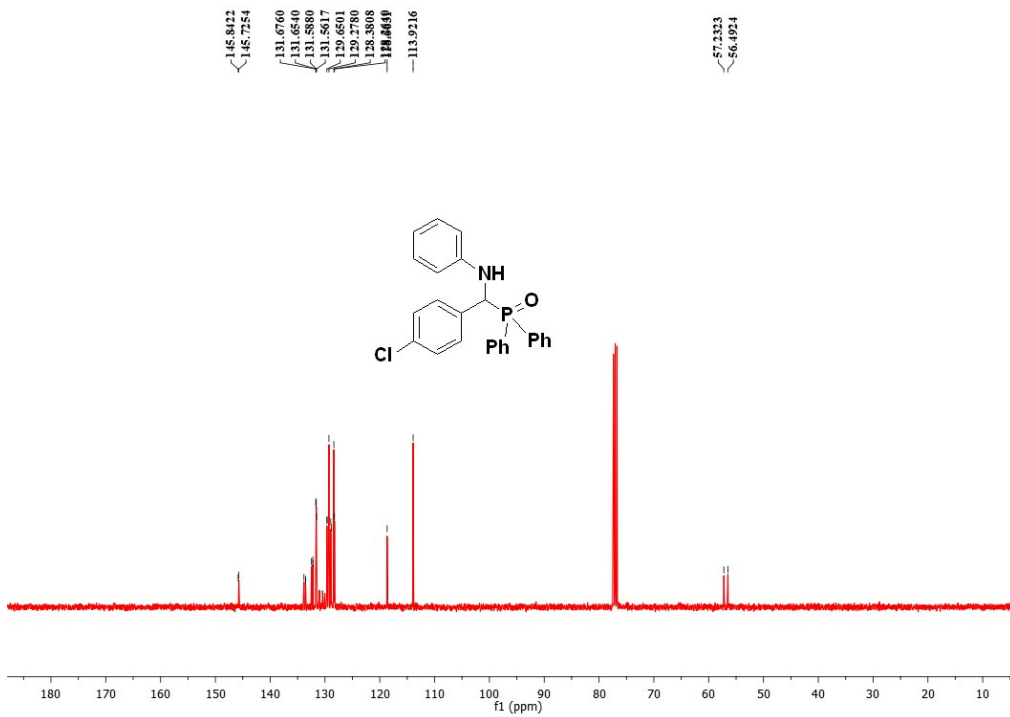

**Fig FS15.**  $^{13}\text{C}\{^1\text{H}\}$  NMR for compound **4c** in  $\text{CDCl}_3$ .

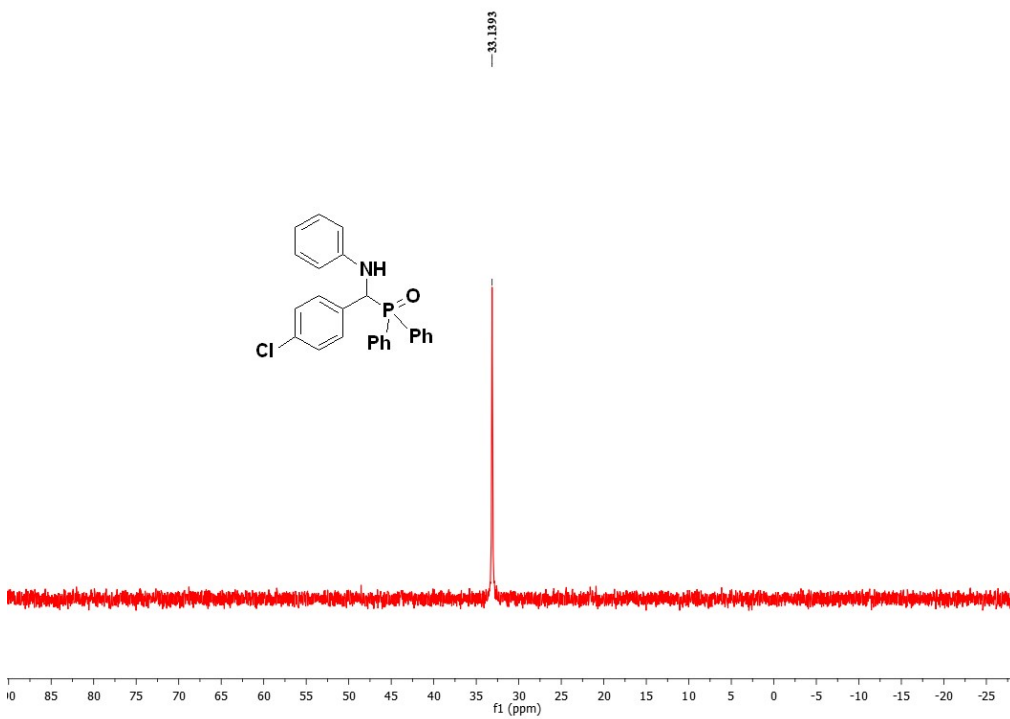

**Fig FS16.**  $^{31}\text{P}\{^1\text{H}\}$  NMR for compound **4c** in  $\text{CDCl}_3$ .

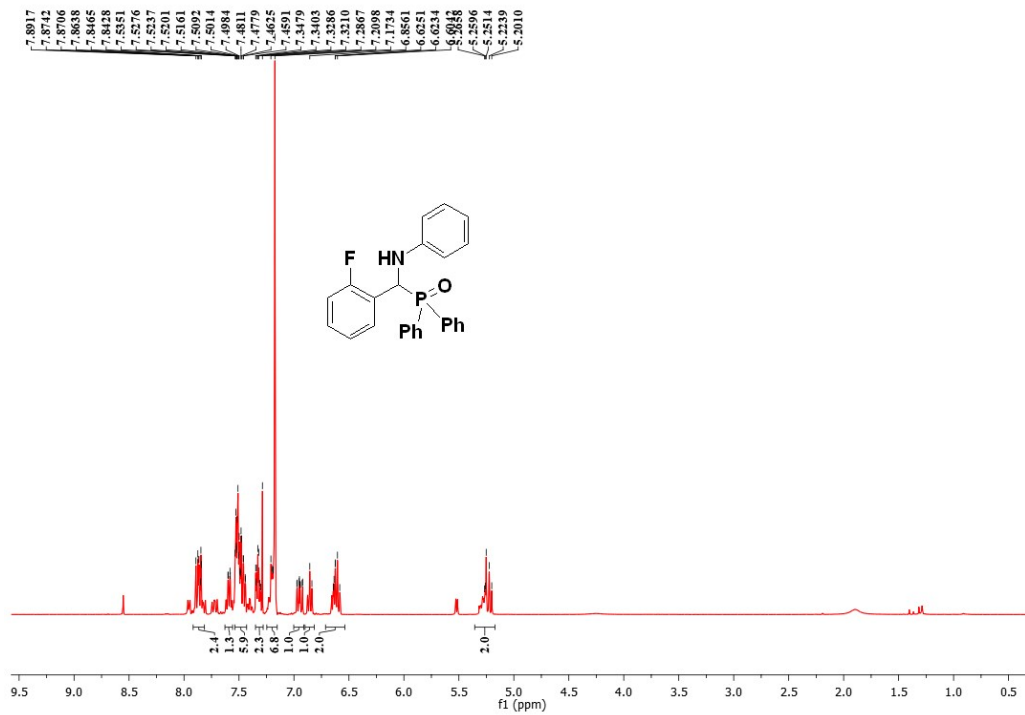

**Fig FS17.**  $^1\text{H}$  NMR for compound **4d** in  $\text{CDCl}_3$ .

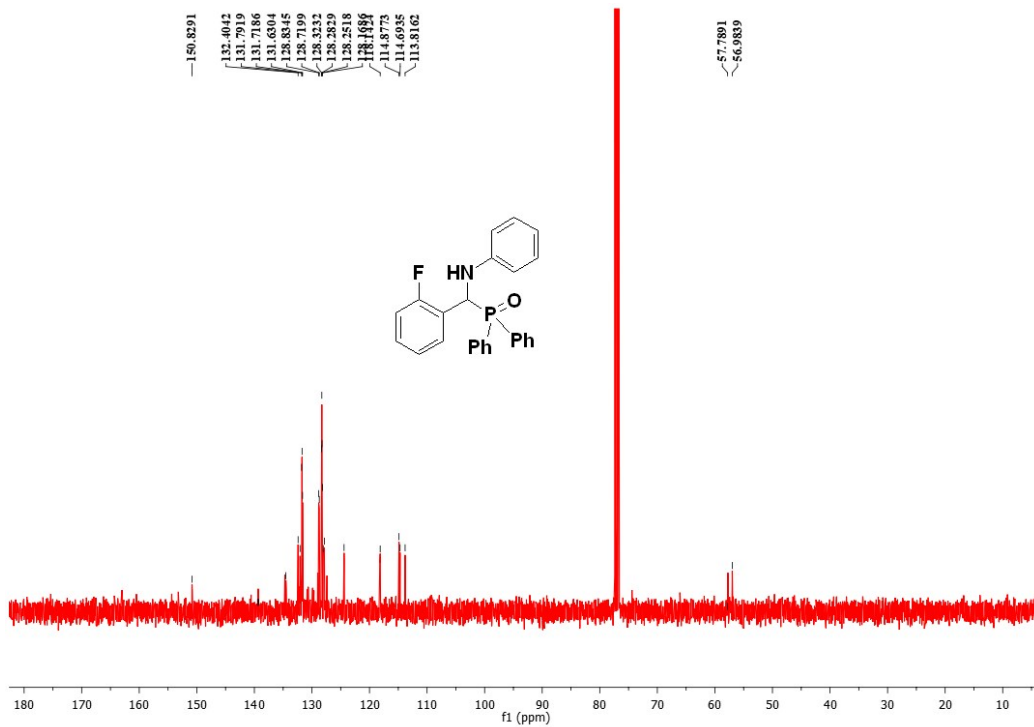

**Fig FS18.**  $^{13}\text{C}\{^1\text{H}\}$  NMR for compound **4d** in  $\text{CDCl}_3$ .

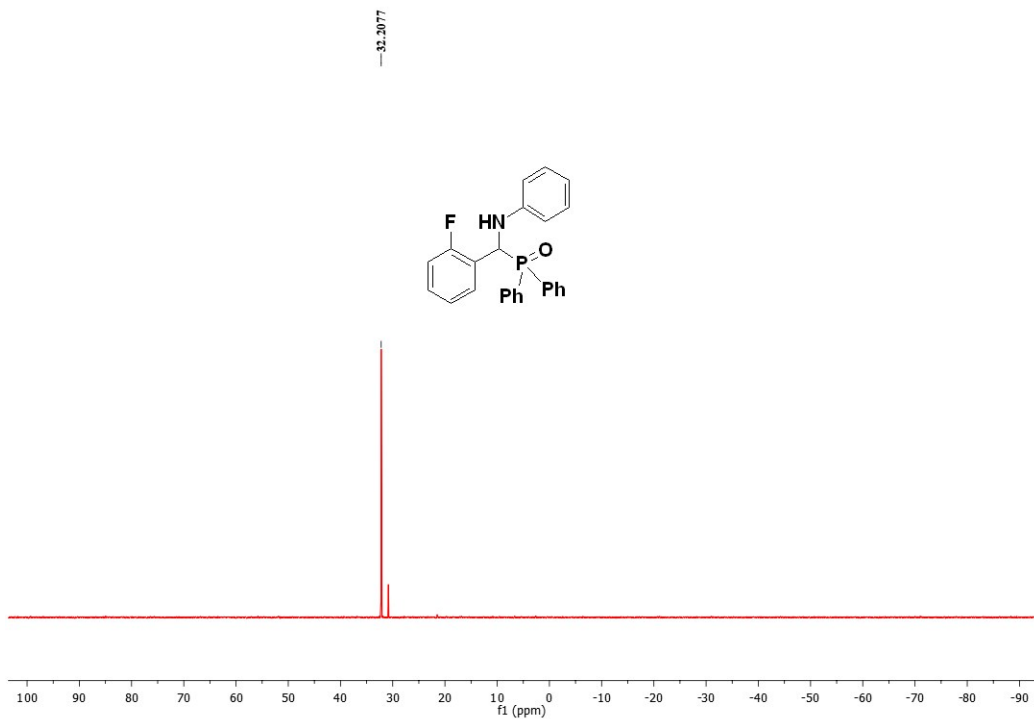

Fig FS19.  $^{31}\text{P}\{^1\text{H}\}$  NMR for compound **4d** in  $\text{CDCl}_3$ .

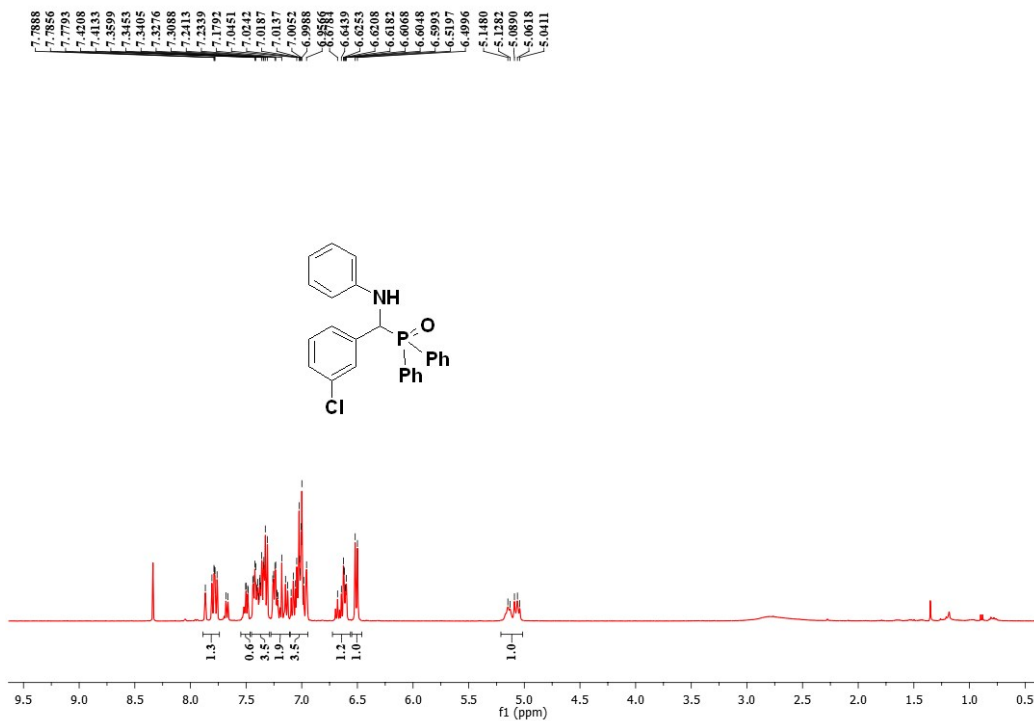

Fig FS20.  $^1\text{H}$  NMR for compound **4e** in  $\text{CDCl}_3$ .

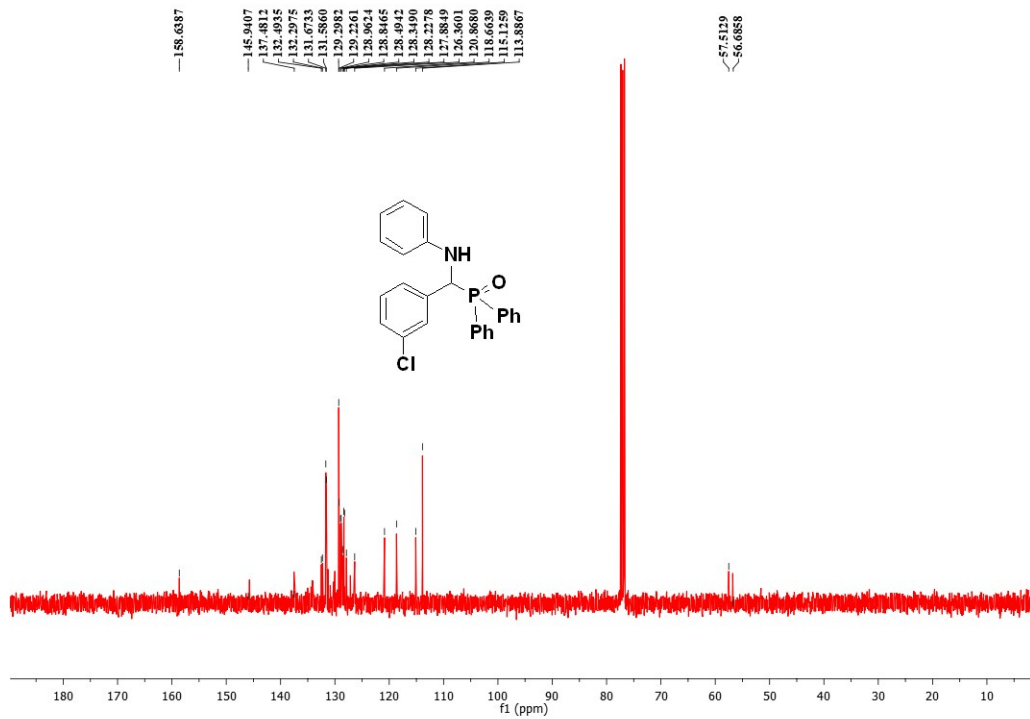

Fig FS21.  $^{13}\text{C}\{^1\text{H}\}$  NMR for compound **4e** in  $\text{CDCl}_3$ .

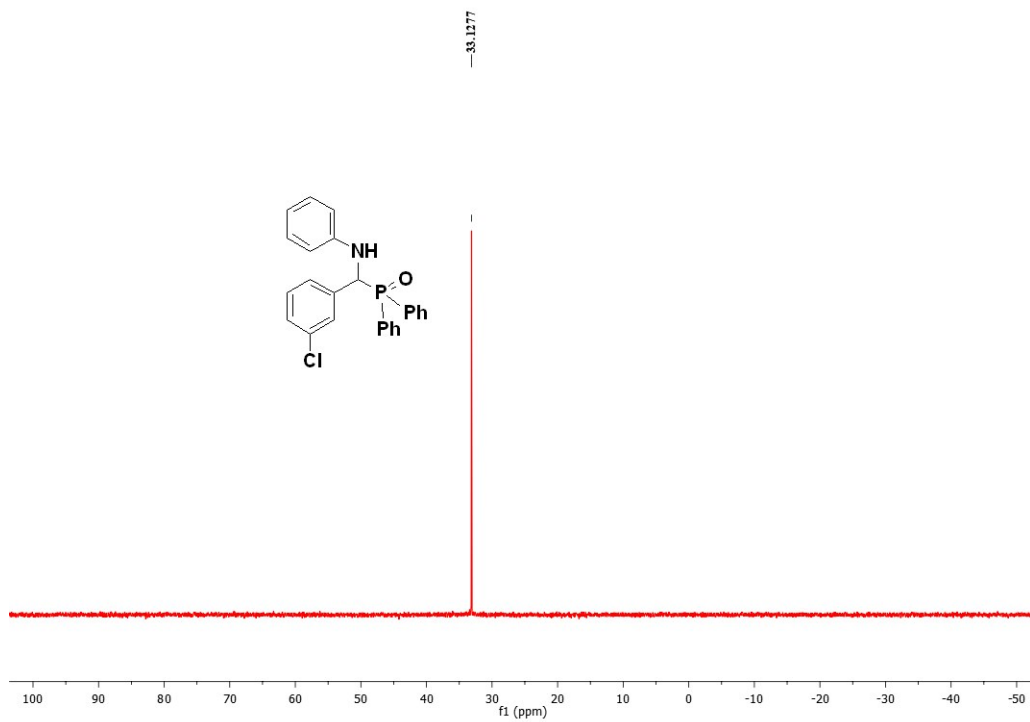

Fig FS22.  $^{31}\text{P}\{^1\text{H}\}$  NMR for compound **4e** in  $\text{CDCl}_3$ .

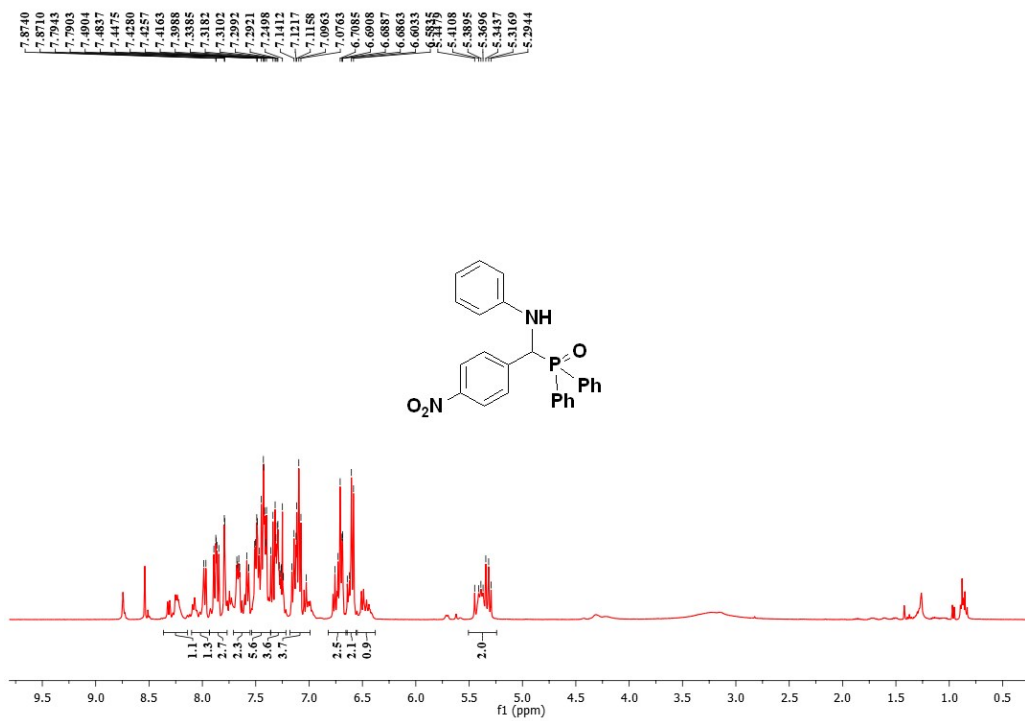

**Fig FS23.**  $^1\text{H}$  NMR for compound **4f** in  $\text{CDCl}_3$ .

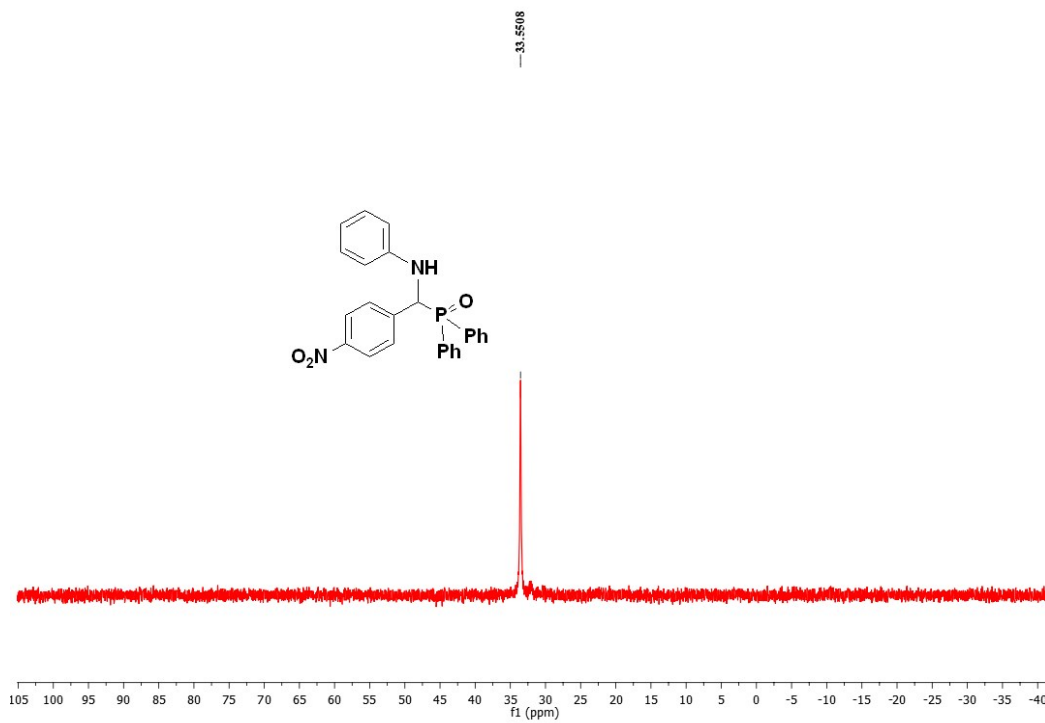

**Fig FS24:**  $^{31}\text{P}\{^1\text{H}\}$  NMR for compound **4f** in  $\text{CDCl}_3$ .

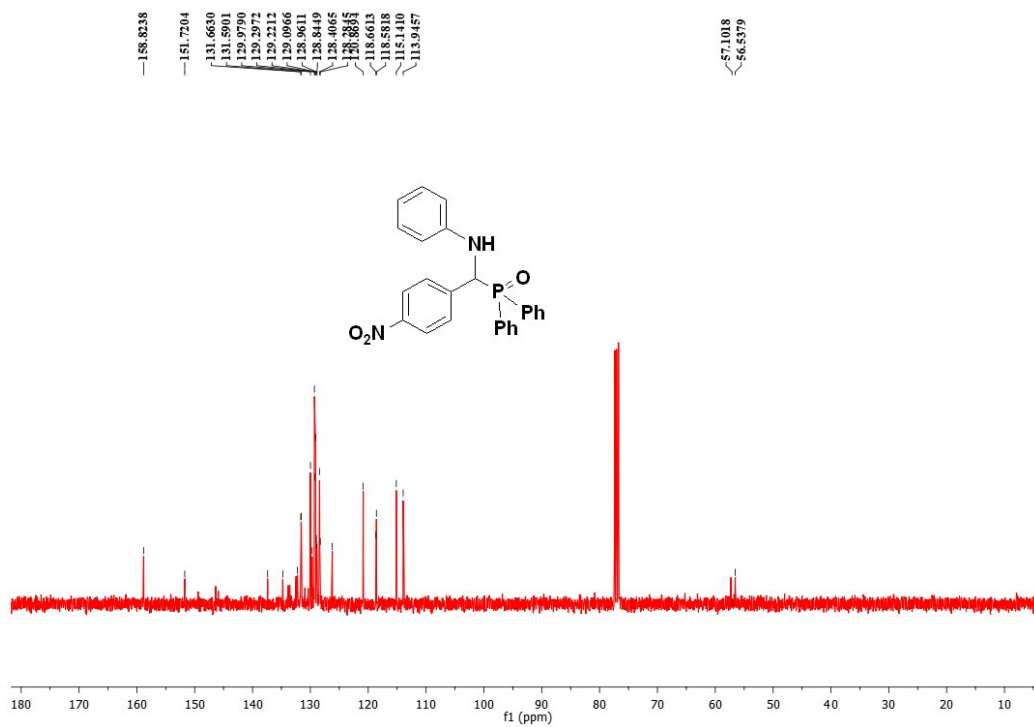

Fig FS25.  $^{13}\text{C}\{^1\text{H}\}$  NMR for compound **4f** in  $\text{CDCl}_3$ .

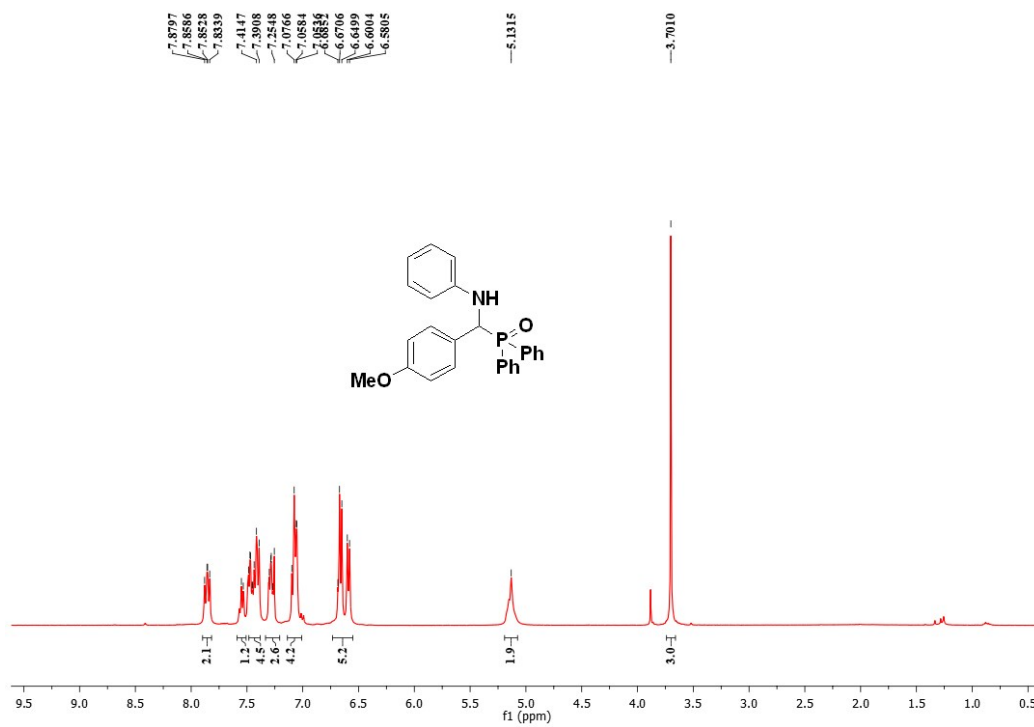

Fig FS26.  $^1\text{H}$  NMR for compound **4g** in  $\text{CDCl}_3$ .

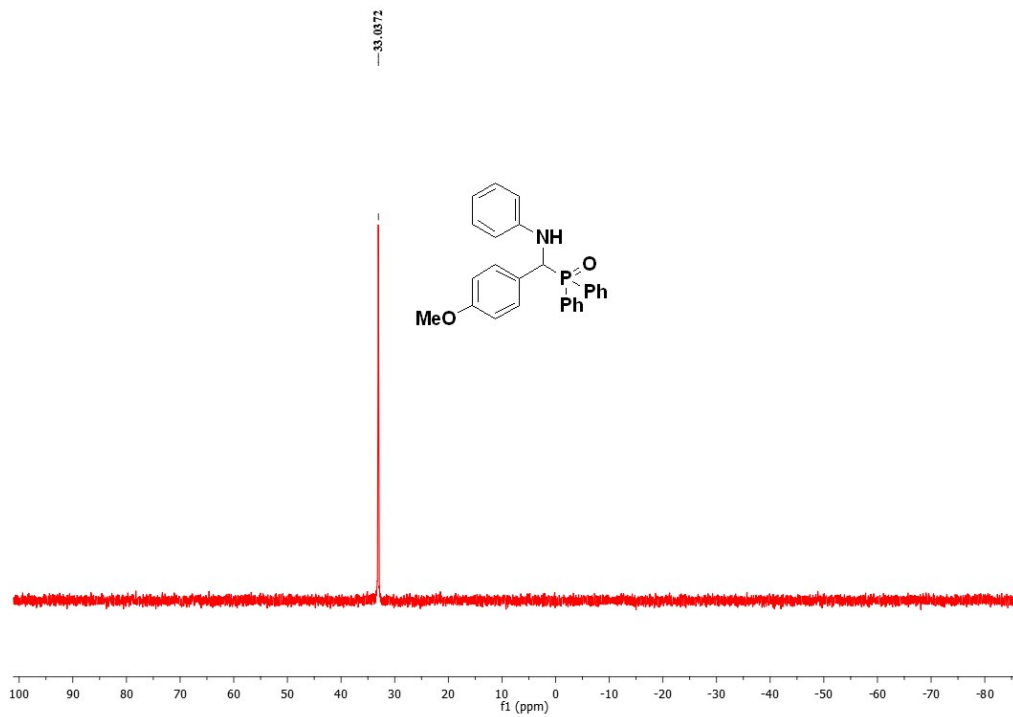

Fig FS27.  $^{31}\text{P}\{^1\text{H}\}$  NMR for compound **4g** in  $\text{CDCl}_3$ .

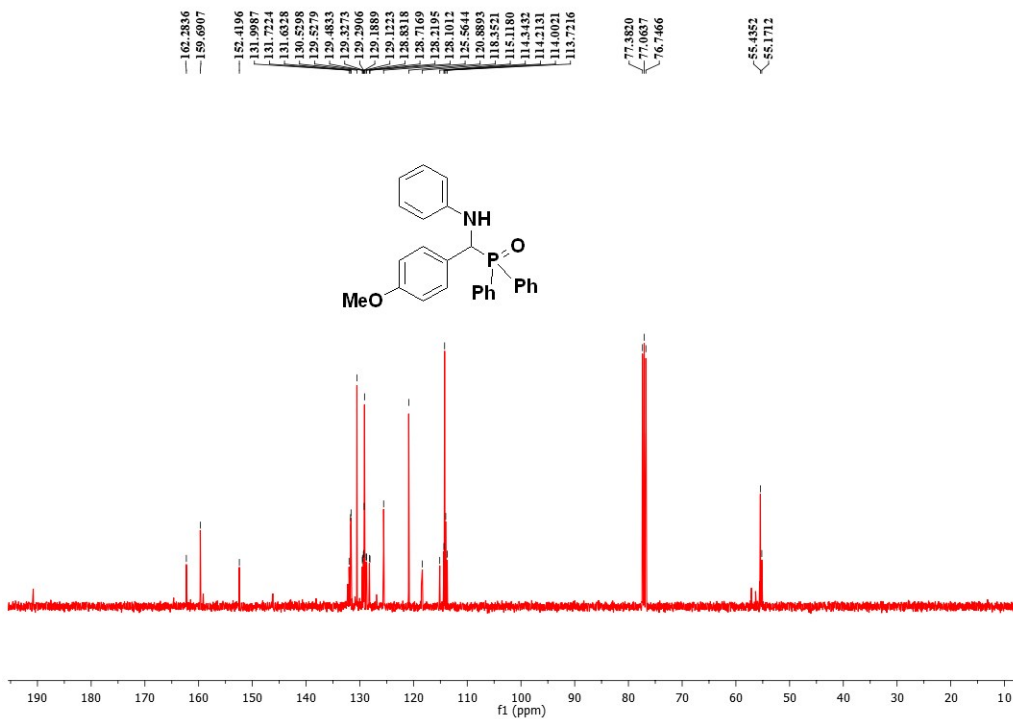

Fig FS28.  $^{13}\text{C}\{^1\text{H}\}$  NMR for compound **4g** in  $\text{CDCl}_3$ .



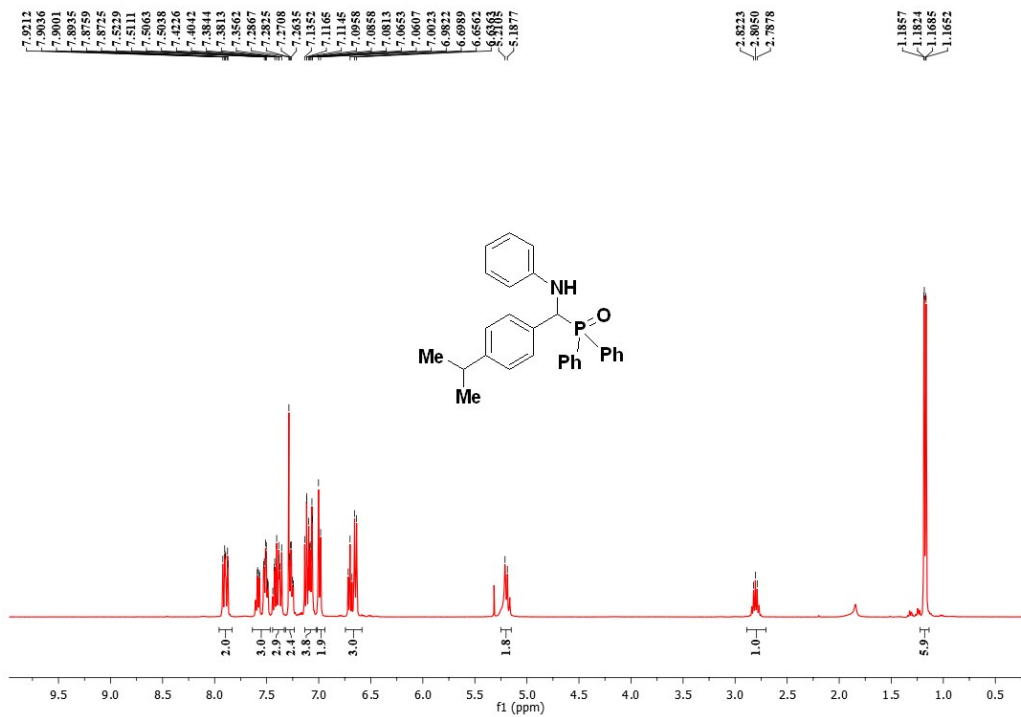

Fig FS29. <sup>1</sup>H NMR for compound **4h** in CDCl<sub>3</sub>.

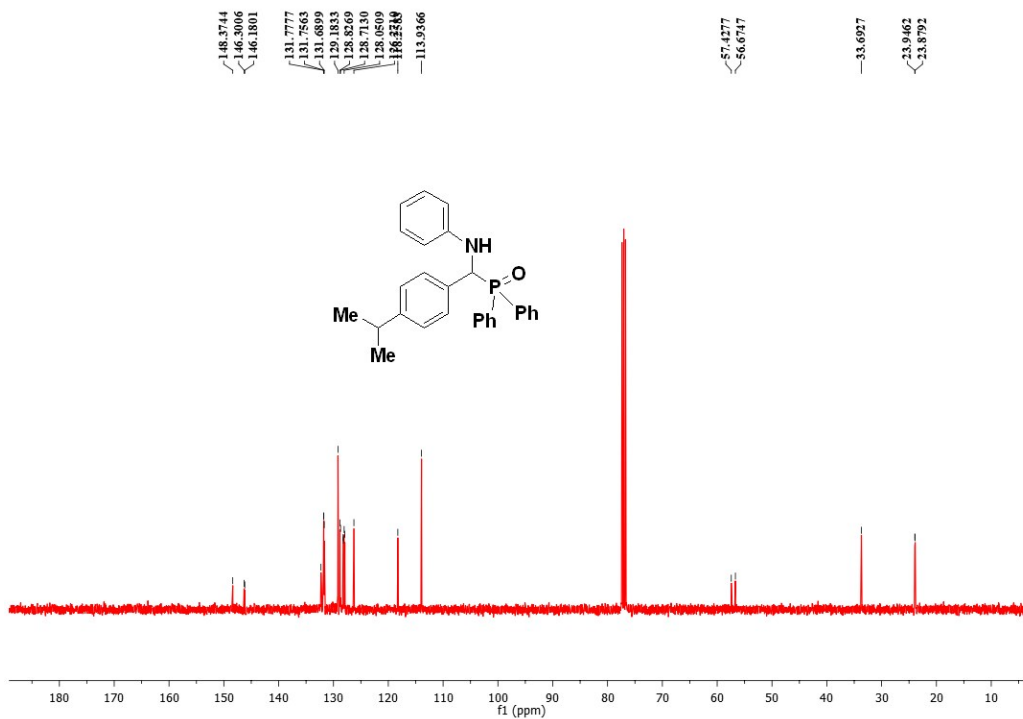

Fig FS30. <sup>13</sup>C {<sup>1</sup>H} NMR for compound **4h** in CDCl<sub>3</sub>.



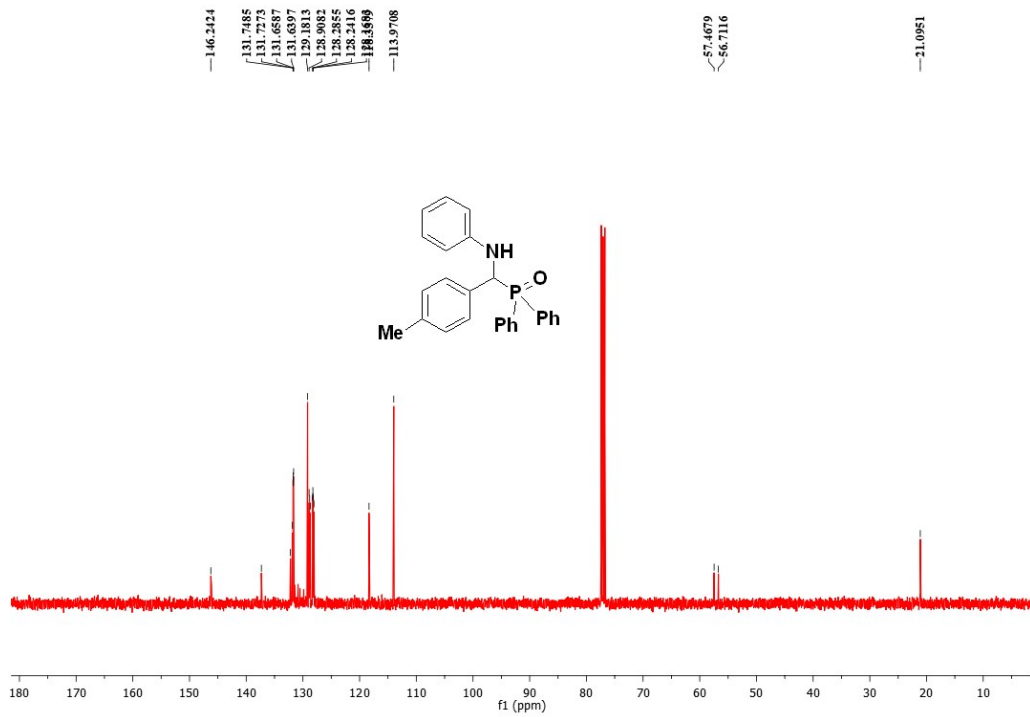

**Fig FS33.**  $^{13}\text{C}\{^1\text{H}\}$  NMR for compound **4i** in  $\text{CDCl}_3$ .

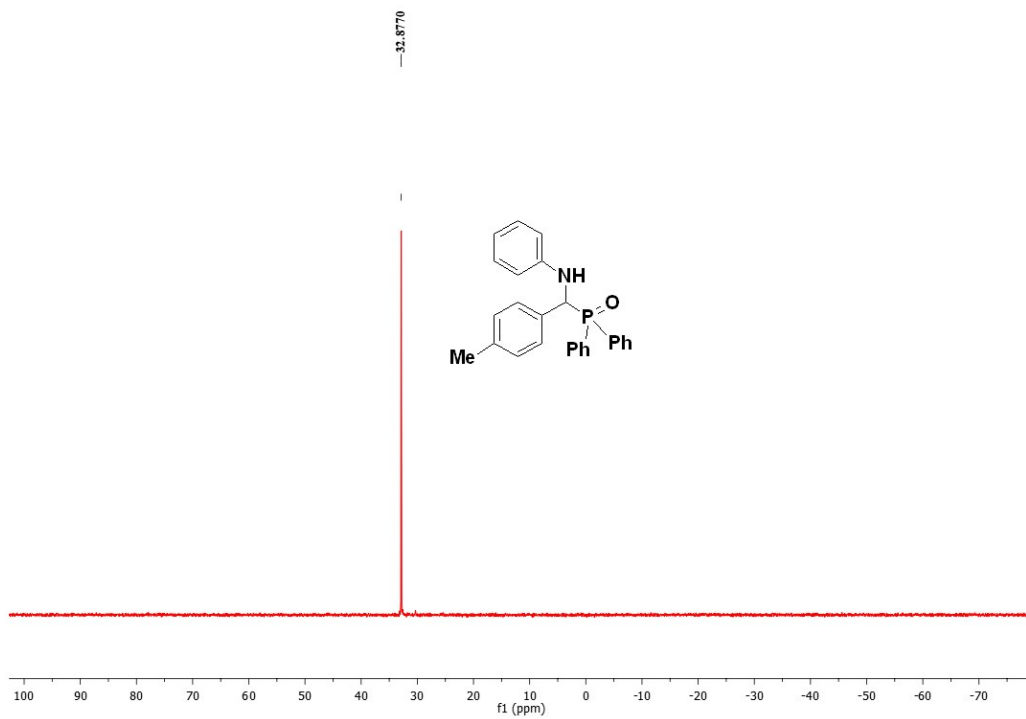

**Fig FS34.**  $^{31}\text{P}\{^1\text{H}\}$  NMR for compound **4i** in  $\text{CDCl}_3$ .

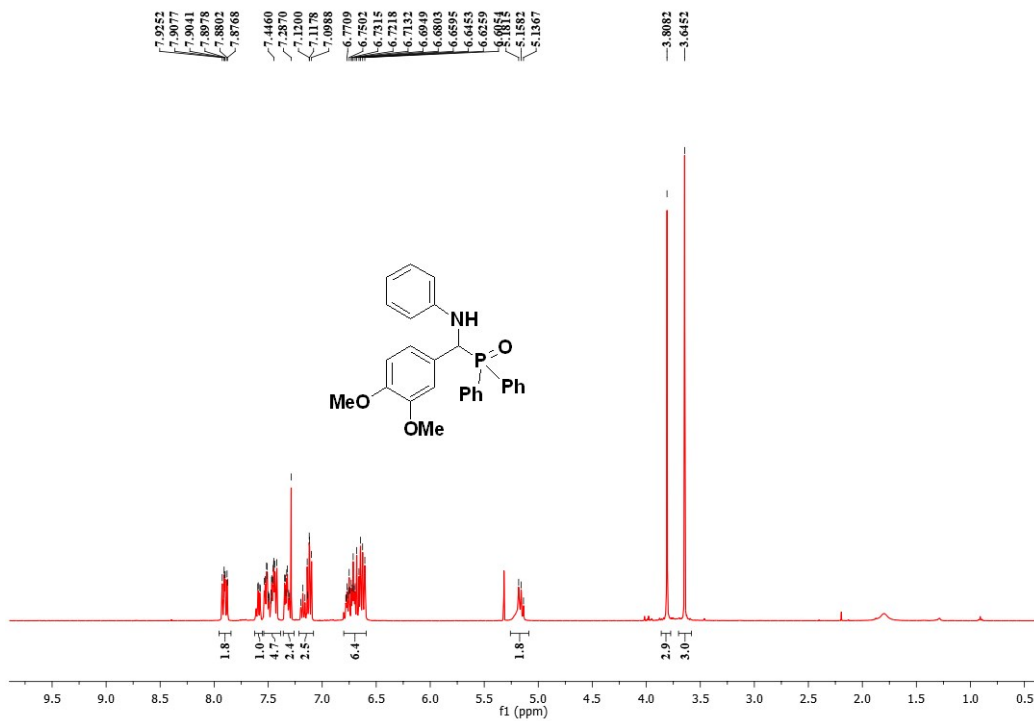

**Fig FS35.**  $^1\text{H}$  NMR for compound **4j** in  $\text{CDCl}_3$ .

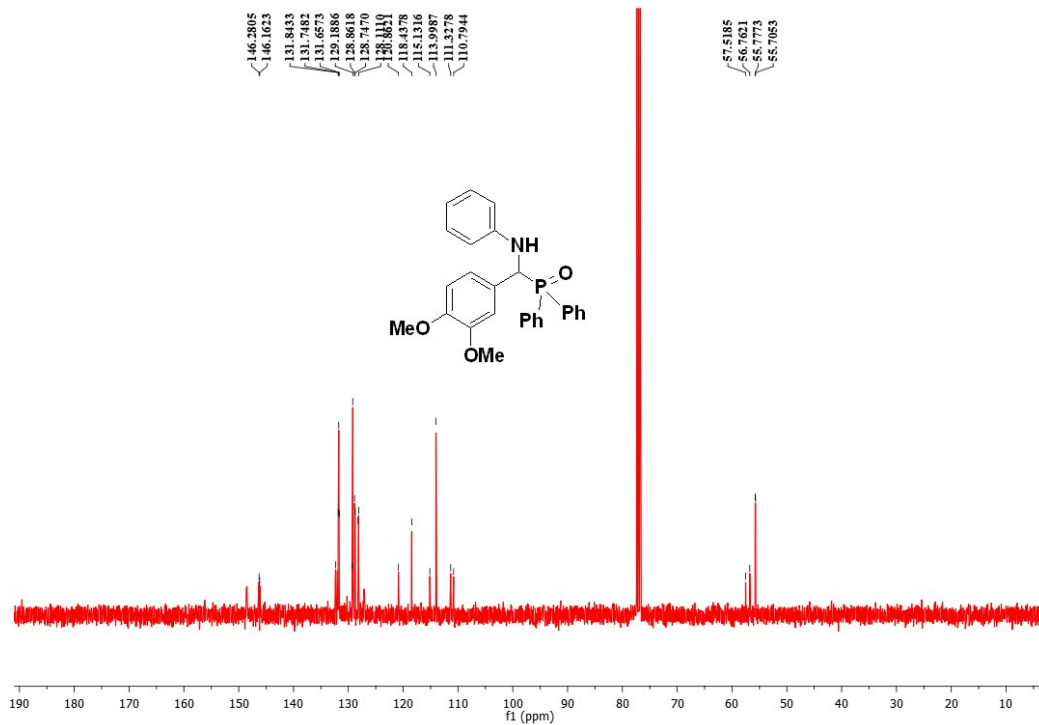

**Fig FS36.**  $^{13}\text{C}\{^1\text{H}\}$  NMR for compound **4j** in  $\text{CDCl}_3$ .

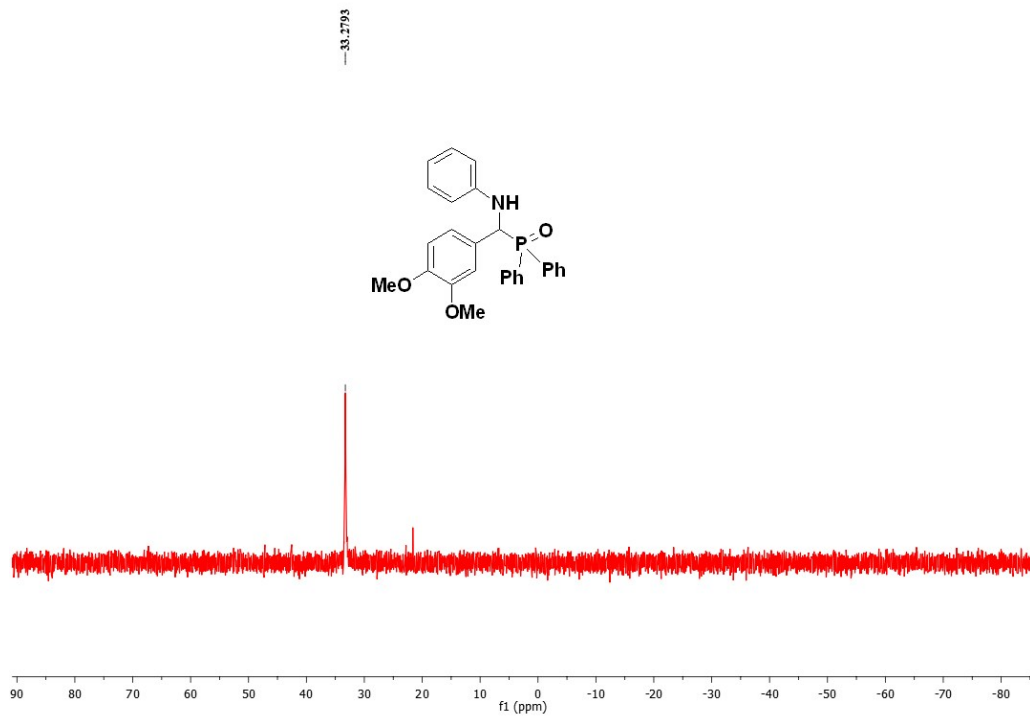

Fig FS37.  $^{31}\text{P}\{^1\text{H}\}$  NMR for compound 4j in  $\text{CDCl}_3$ .

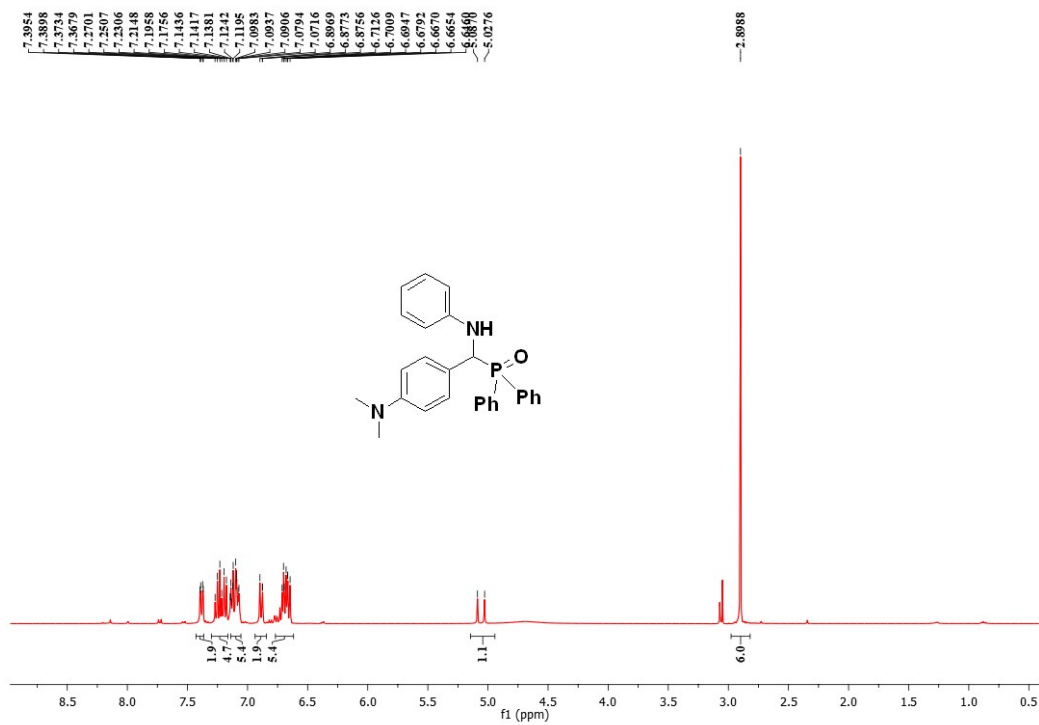

Fig FS38.  $^1\text{H}$  NMR for compound 4k in  $\text{CDCl}_3$ .

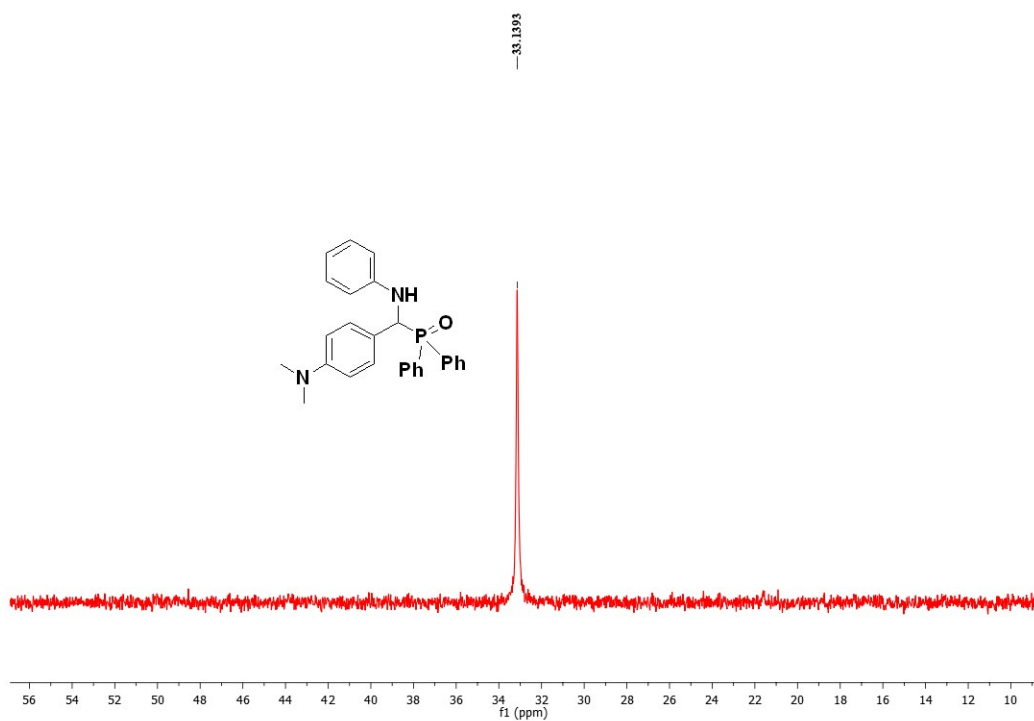

**Fig FS39.**  $^{31}\text{P}\{^1\text{H}\}$  NMR for compound **4k** in  $\text{CDCl}_3$ .

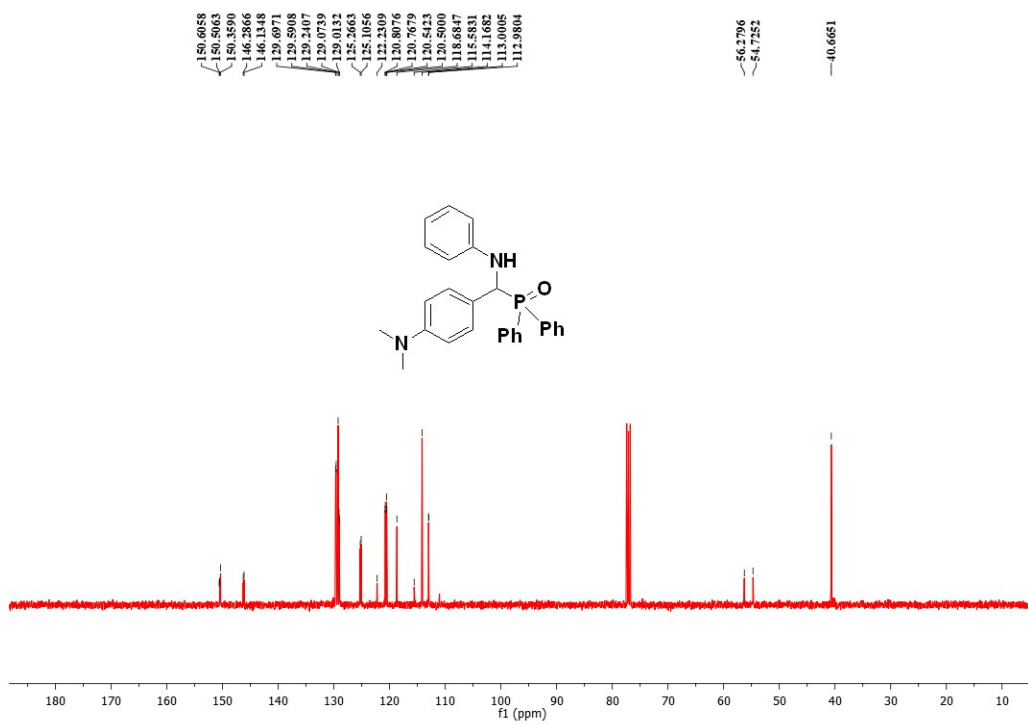

**Fig FS40.**  $^{13}\text{C}\{^1\text{H}\}$  NMR for compound **4k** in  $\text{CDCl}_3$ .

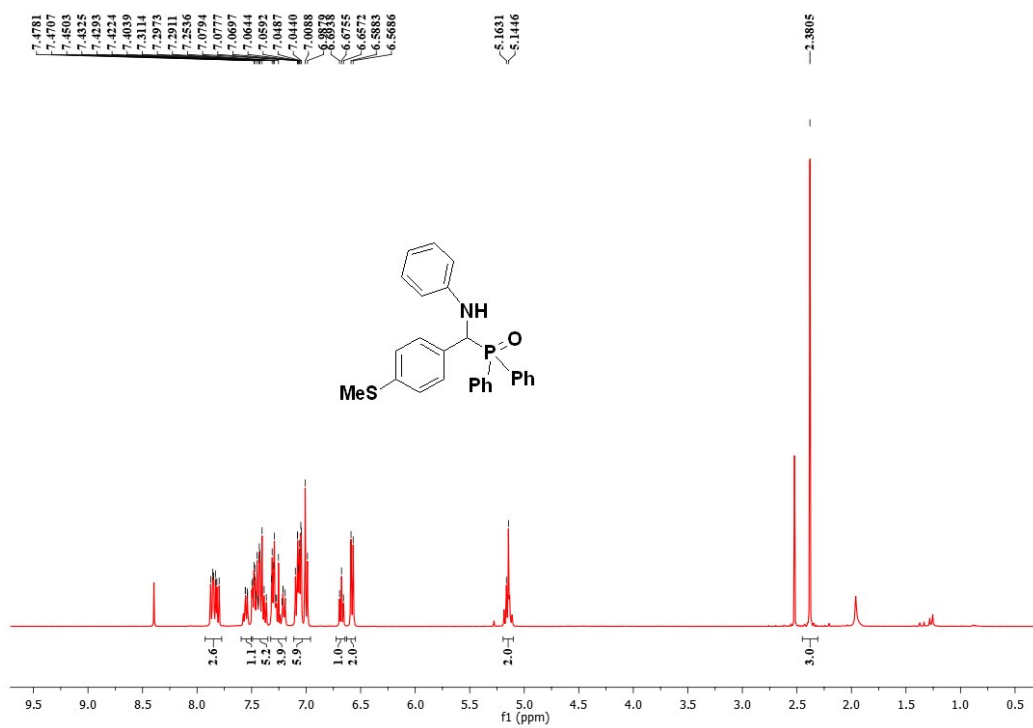

Fig FS41.  $^1\text{H}$  NMR for compound **4I** in CDCl<sub>3</sub>.

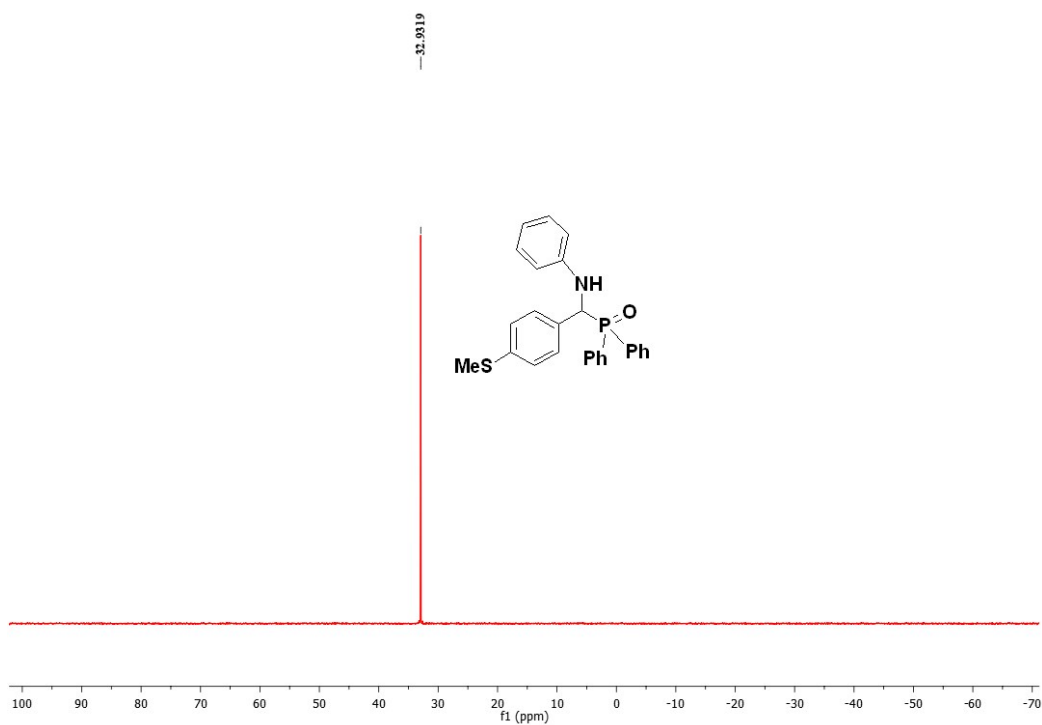

Fig FS42.  $^{31}\text{P}\{^1\text{H}\}$  NMR for compound **4I** in CDCl<sub>3</sub>.

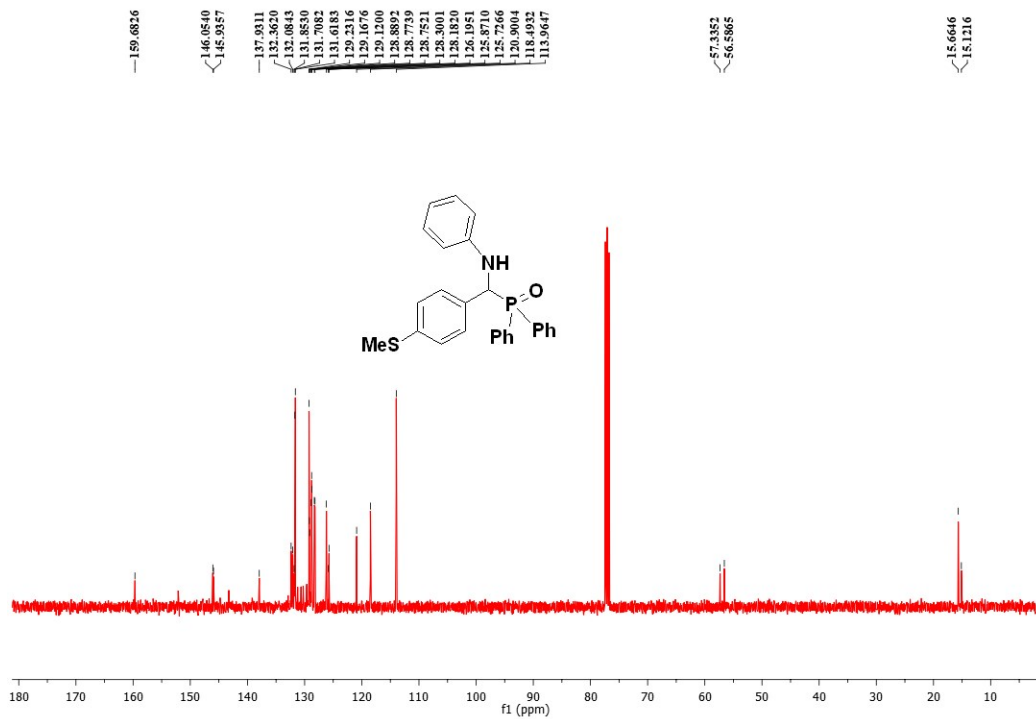

Fig FS43:  $^{13}\text{C}\{^1\text{H}\}$  NMR for compound 4l in  $\text{CDCl}_3$ .

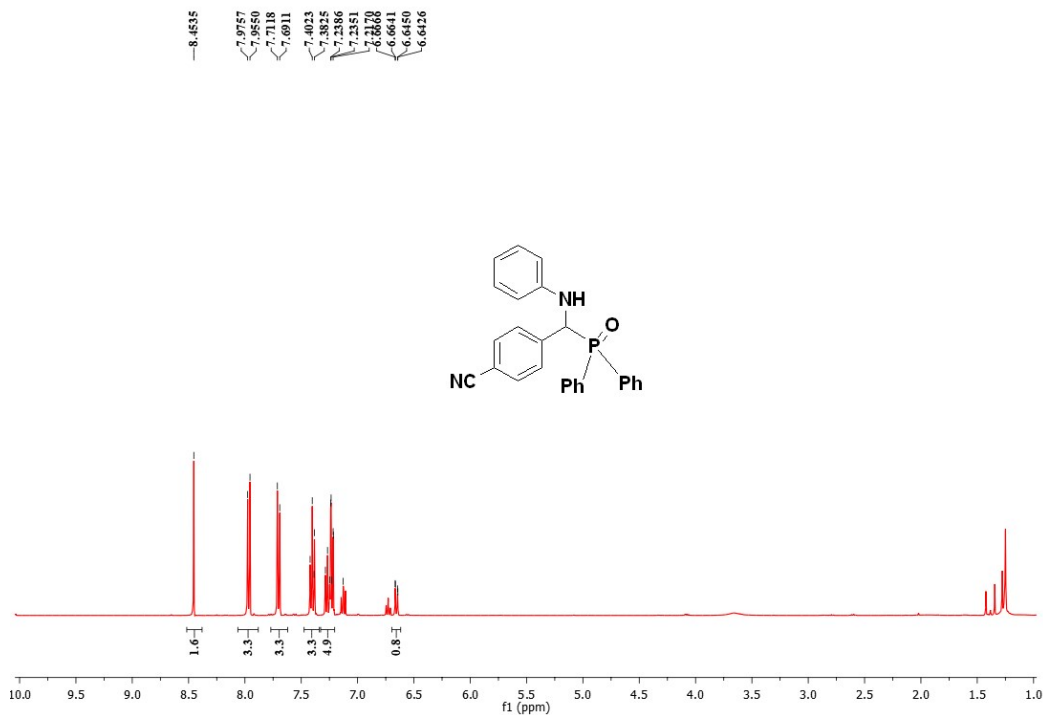

Fig FS44.  $^1\text{H}$  NMR for compound 4m in  $\text{CDCl}_3$ .



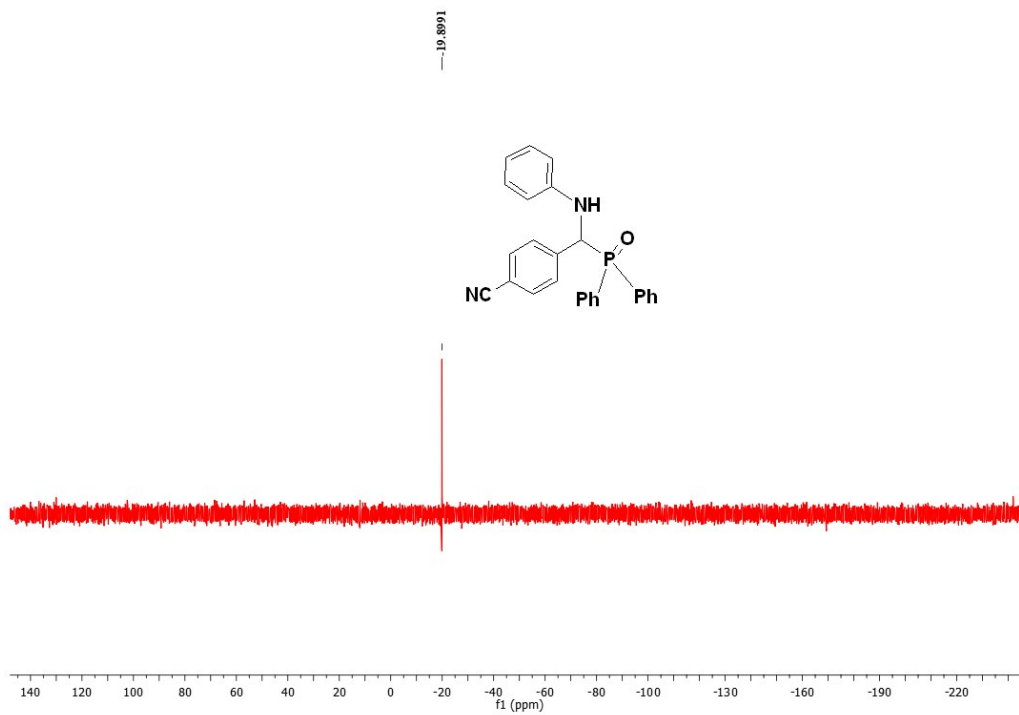

Fig FS45.  $^{31}\text{P}\{^1\text{H}\}$  NMR for compound **4m** in  $\text{CDCl}_3$ .

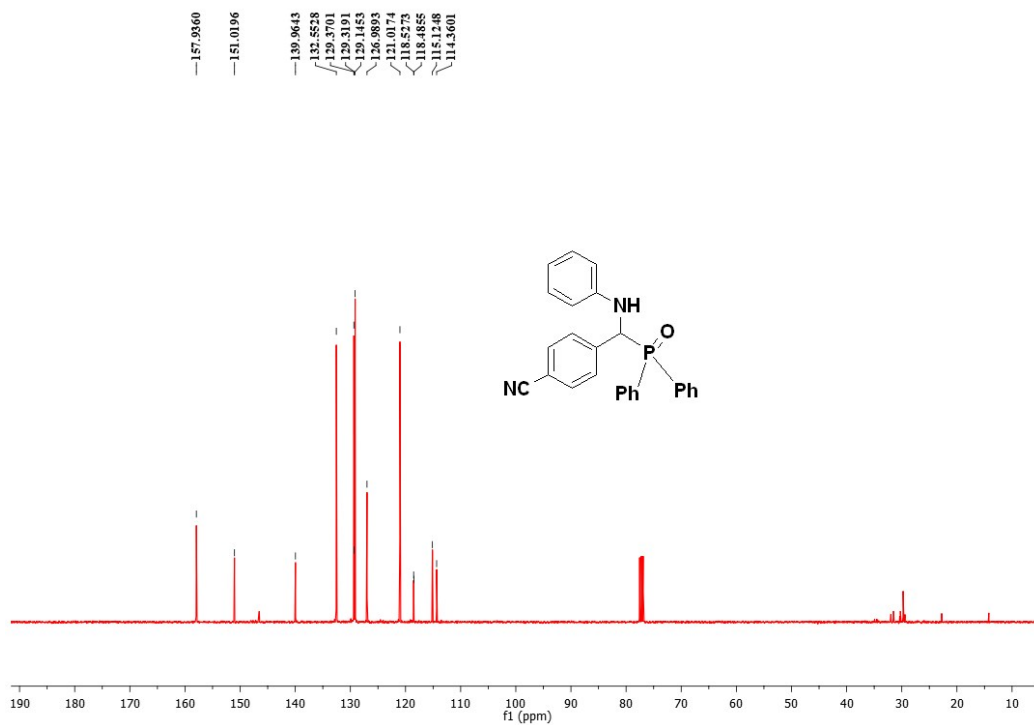

Fig FS46.  $^{13}\text{C}\{^1\text{H}\}$  NMR for compound **4m** in  $\text{CDCl}_3$ .

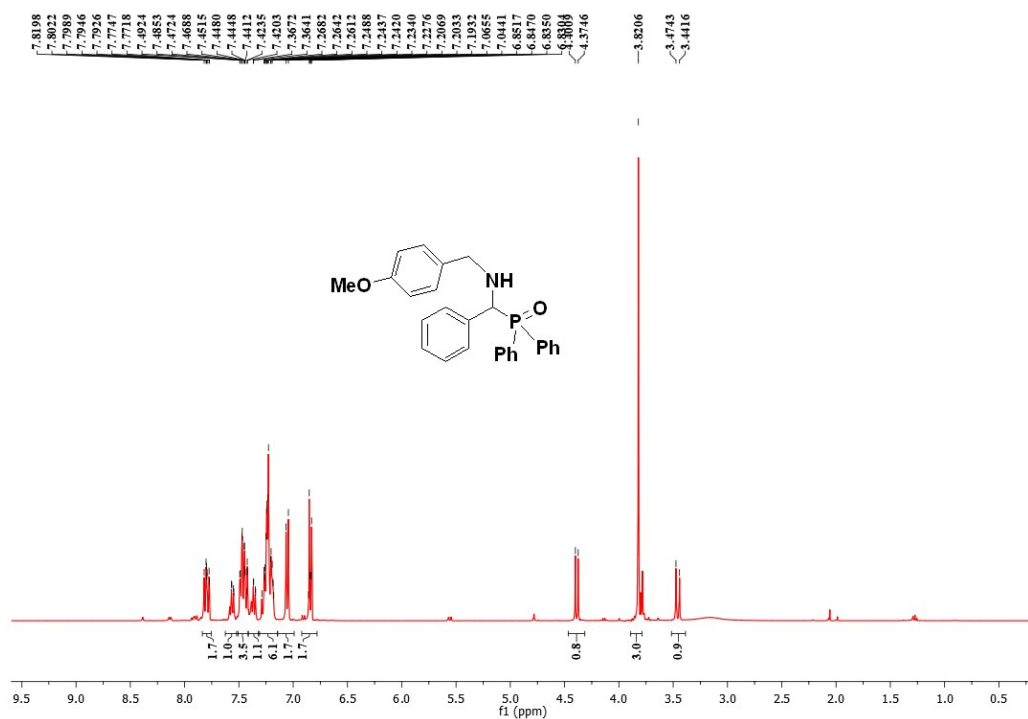

**Fig FS47.** <sup>1</sup>H NMR for compound **4n** in CDCl<sub>3</sub>.

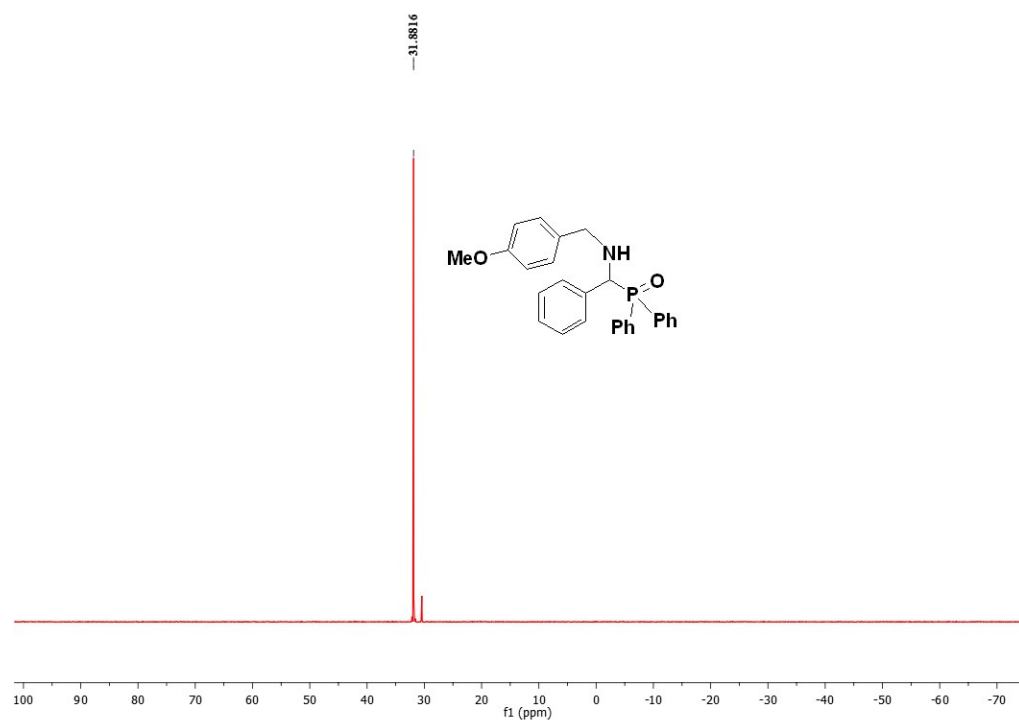

**Fig FS48.** <sup>31</sup>P{<sup>1</sup>H} NMR for compound **4n** in CDCl<sub>3</sub>.

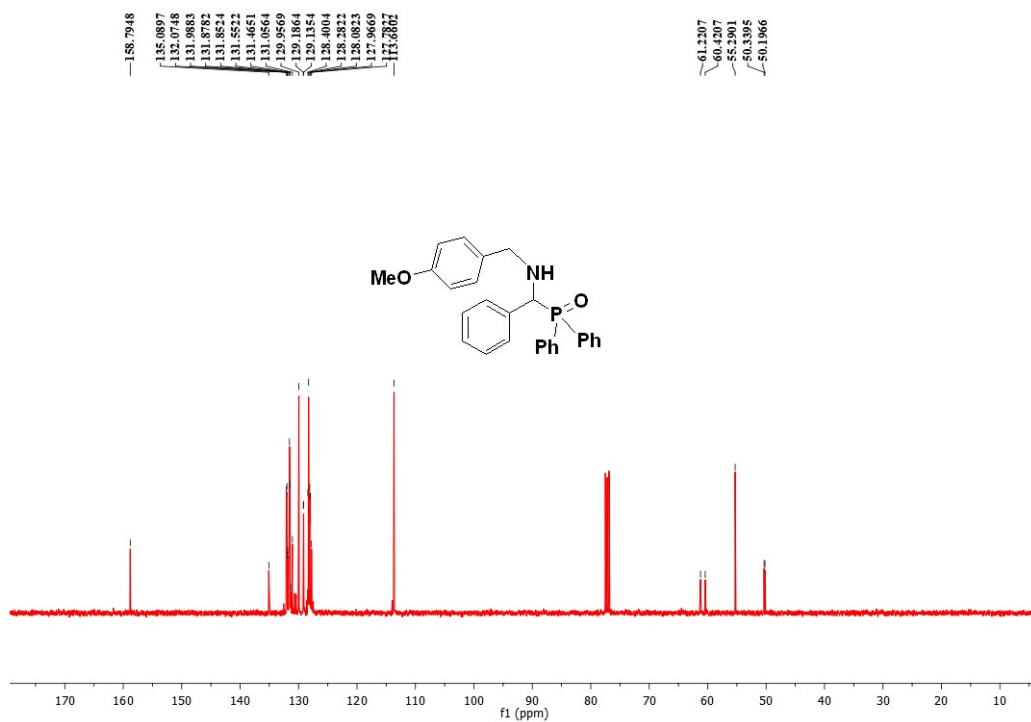

Fig FS49.  $^{13}\text{C}\{^1\text{H}\}$  NMR for compound **4n** in  $\text{CDCl}_3$ .

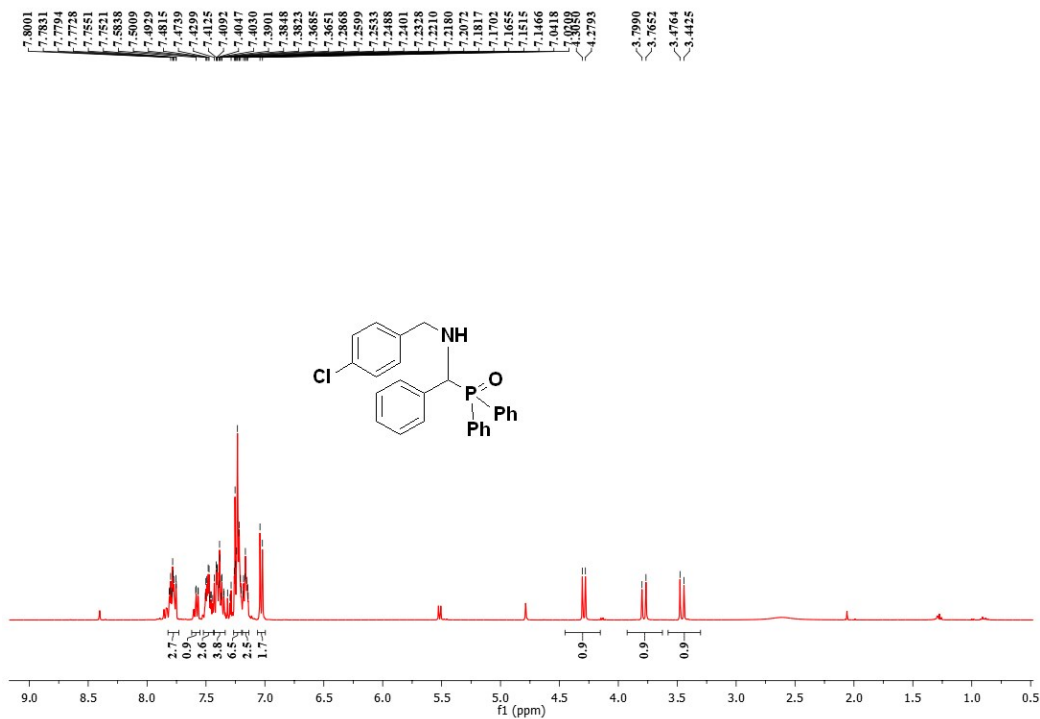

Fig FS50.  $^1\text{H}$  NMR for compound **4o** in  $\text{CDCl}_3$ .

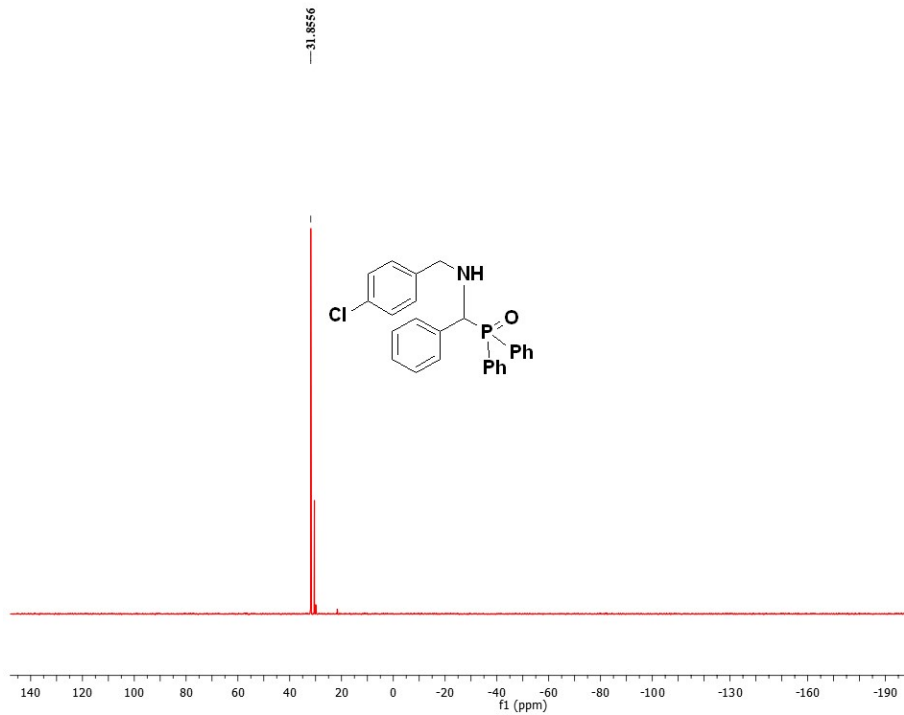

**Fig FS51.**  $^{31}\text{P}\{^1\text{H}\}$  NMR for compound **4o** in  $\text{CDCl}_3$ .

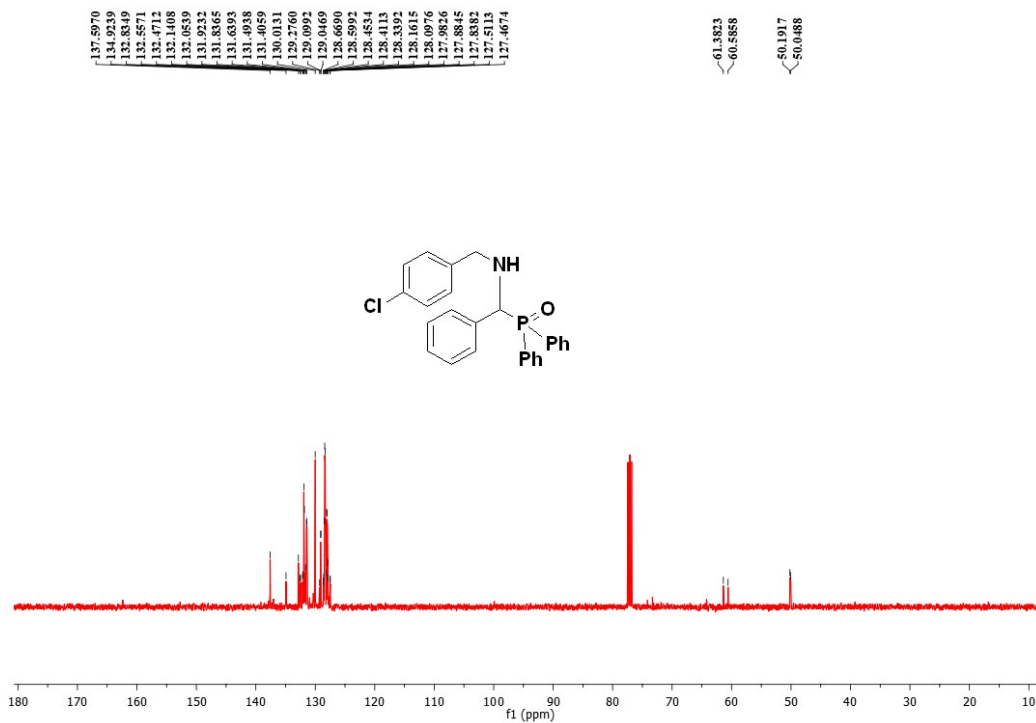

**Fig FS52.**  $^{13}\text{C}\{^1\text{H}\}$  NMR for compound **4o** in  $\text{CDCl}_3$ .

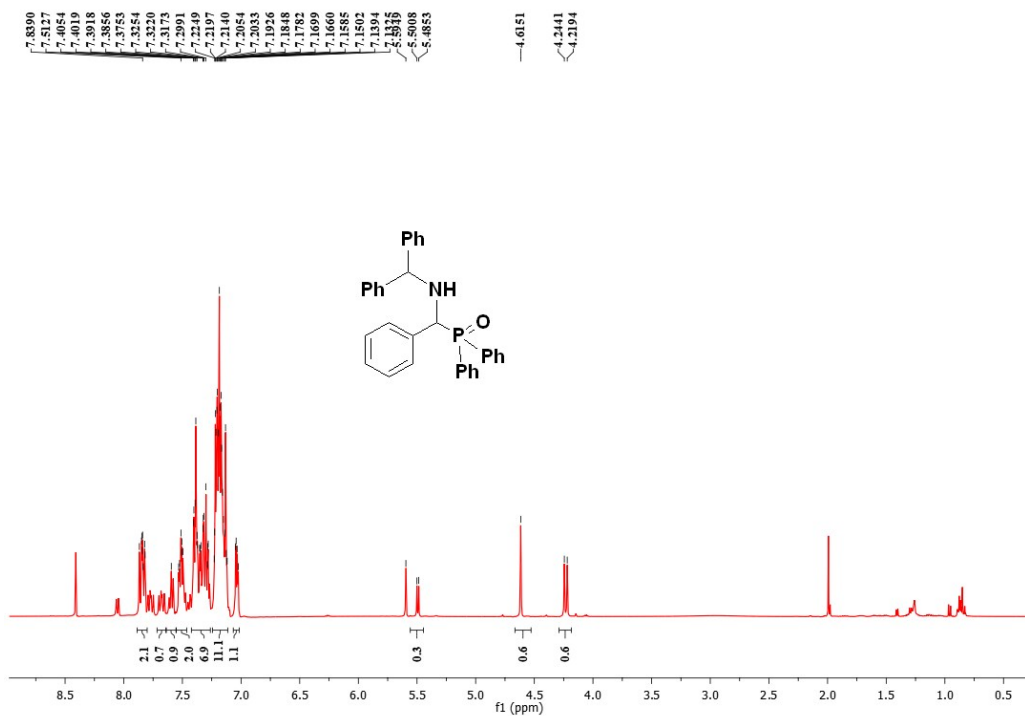

Fig FS53.  $^1\text{H}$  NMR for compound **4p** in  $\text{CDCl}_3$ .

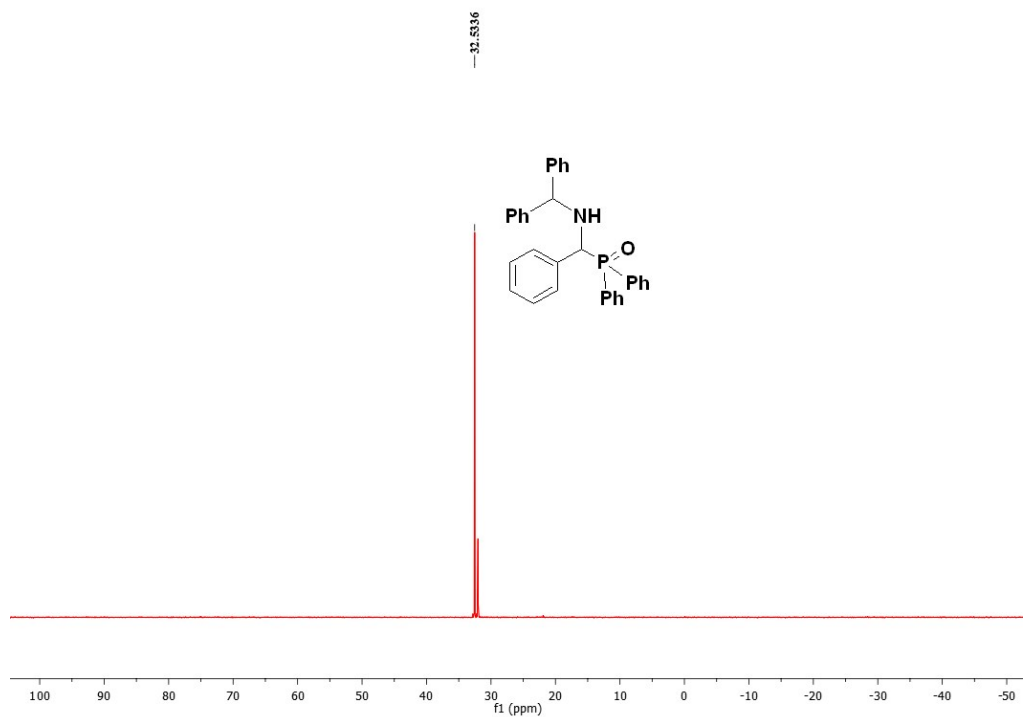

Fig FS54.  $^{31}\text{P}\{^1\text{H}\}$  NMR for compound **4p** in  $\text{CDCl}_3$ .

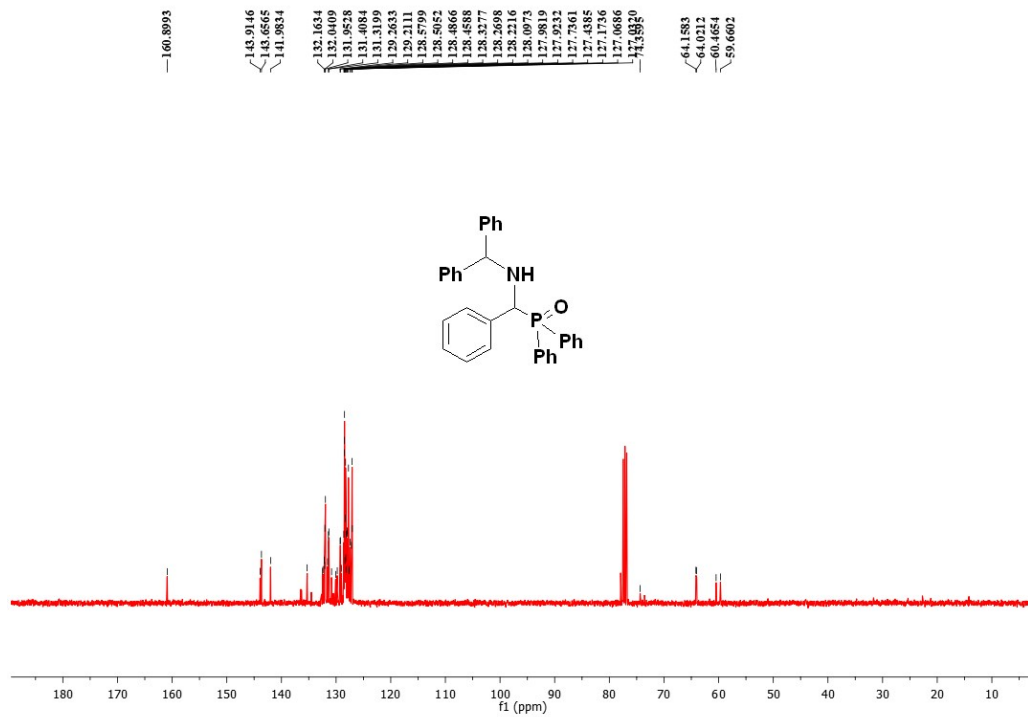

Fig FS55.  $^{13}\text{C}\{^1\text{H}\}$  NMR for compound **4p** in  $\text{CDCl}_3$ .

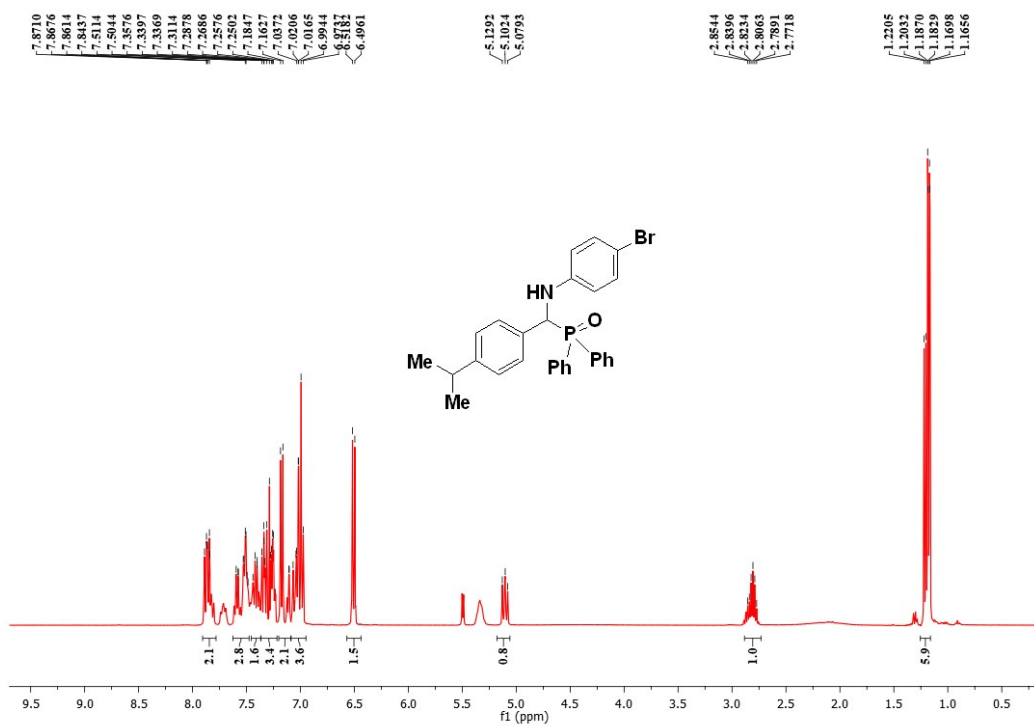

Fig FS56.  $^1\text{H}$  NMR for compound **4q** in  $\text{CDCl}_3$ .

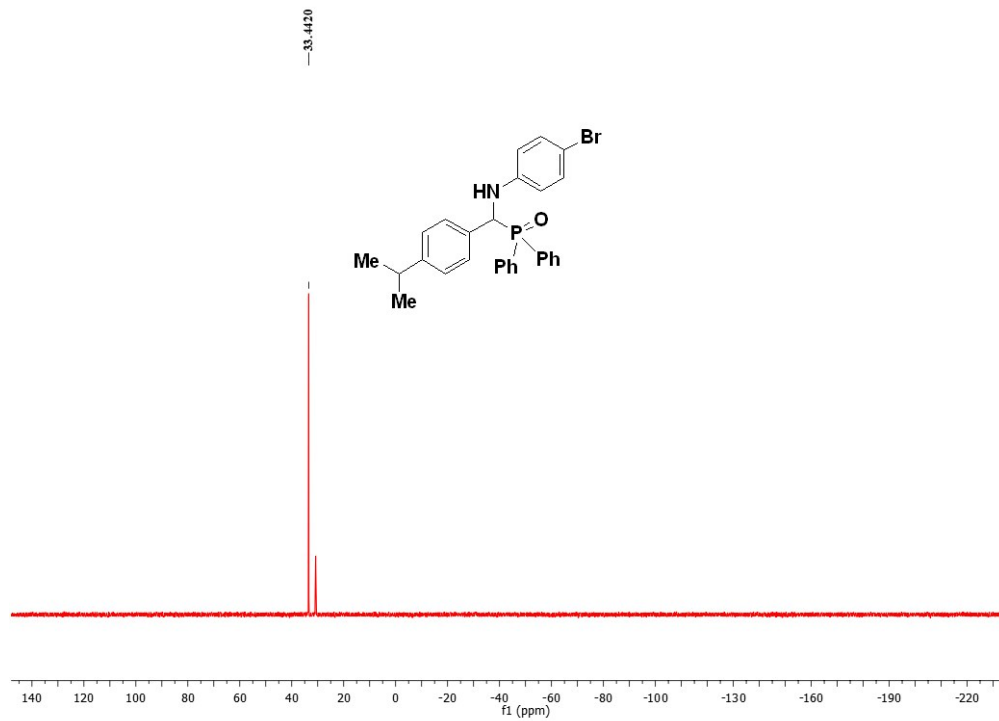

Fig FS57.  $^{31}\text{P}\{^1\text{H}\}$  NMR for compound **4q** in  $\text{CDCl}_3$ .

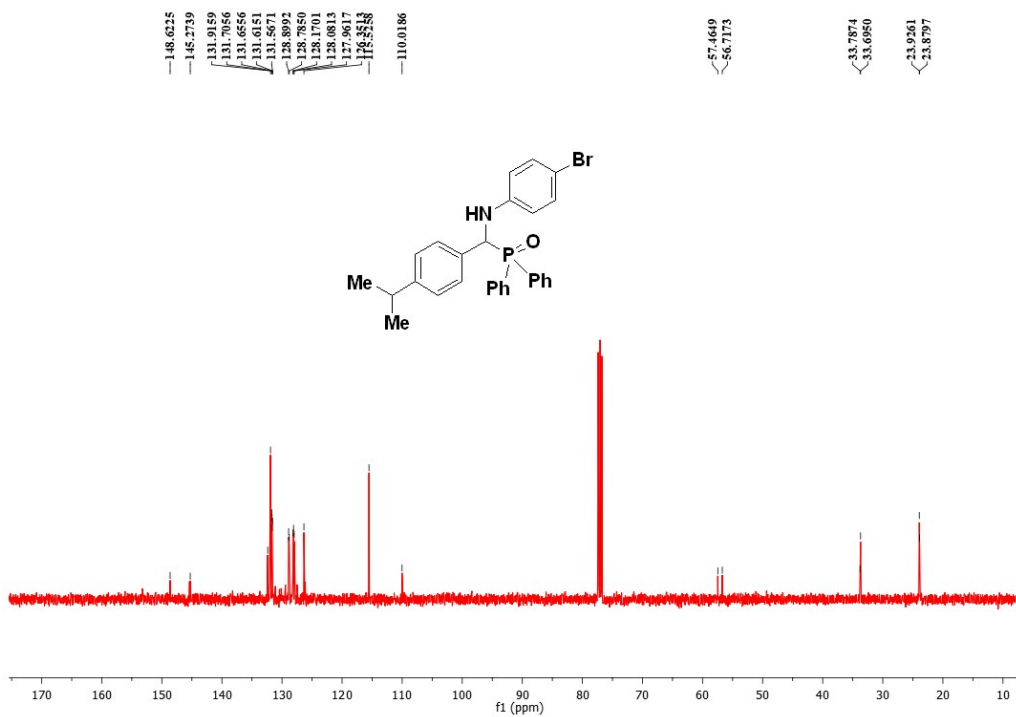

Fig FS58.  $^{13}\text{C}\{^1\text{H}\}$  NMR for compound **4q** in  $\text{CDCl}_3$ .

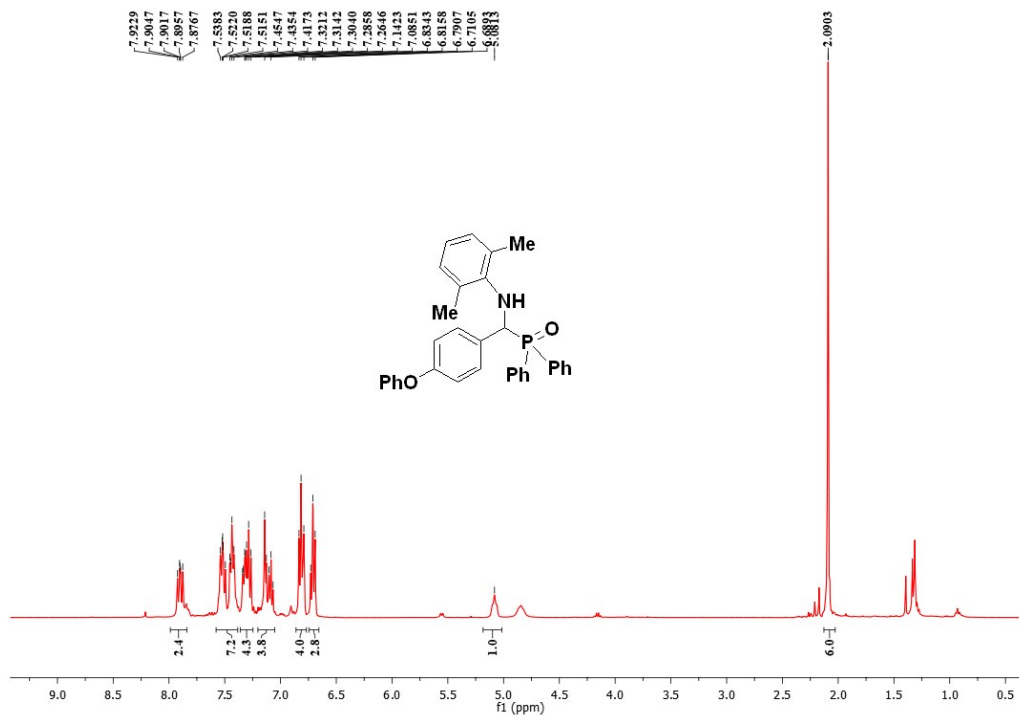

**Fig FS59.**  $^1\text{H}$  NMR for compound **4r** in  $\text{CDCl}_3$ .

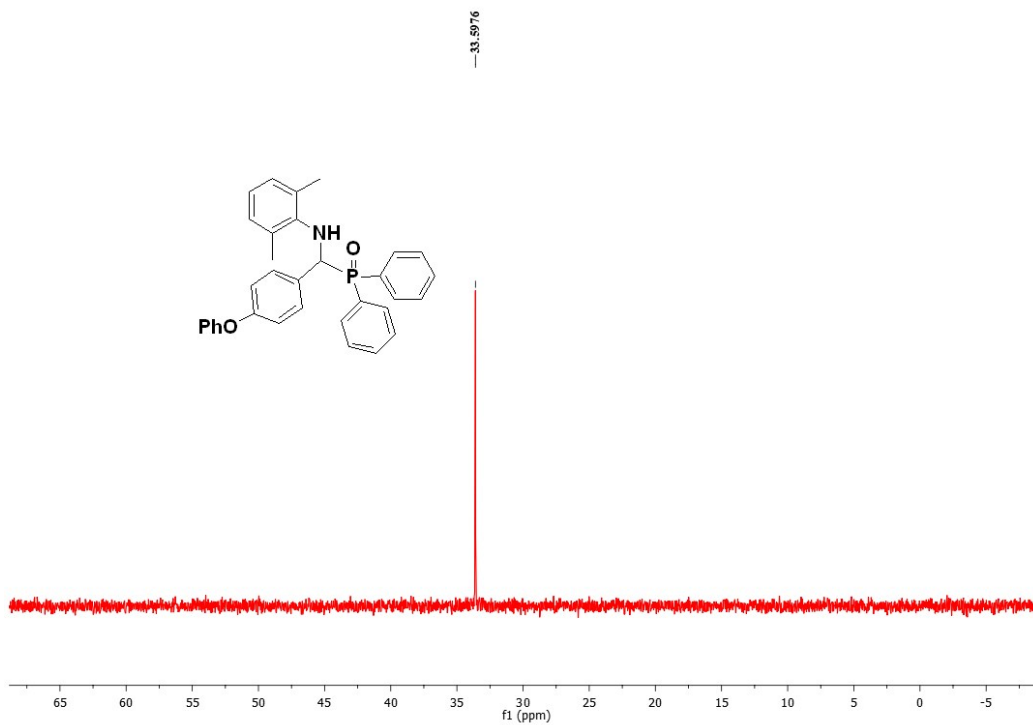

**Fig FS60.**  $^{31}\text{P}\{^1\text{H}\}$  NMR for compound **4r** in  $\text{CDCl}_3$ .



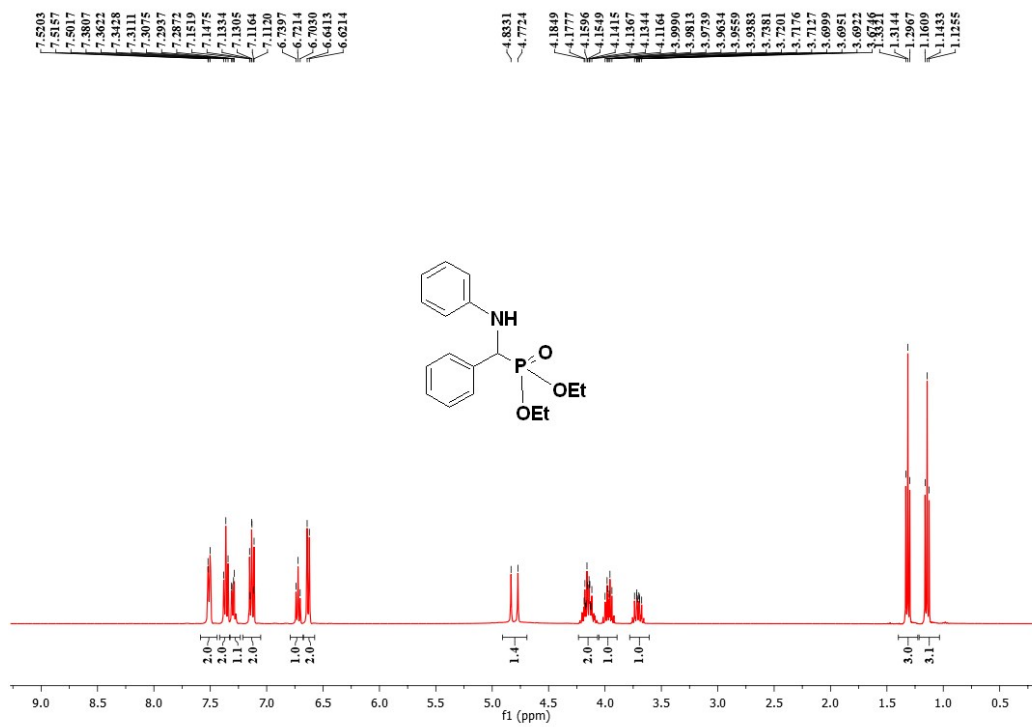

**Fig FS61.** <sup>1</sup>H NMR for compound **5a** in CDCl<sub>3</sub>.

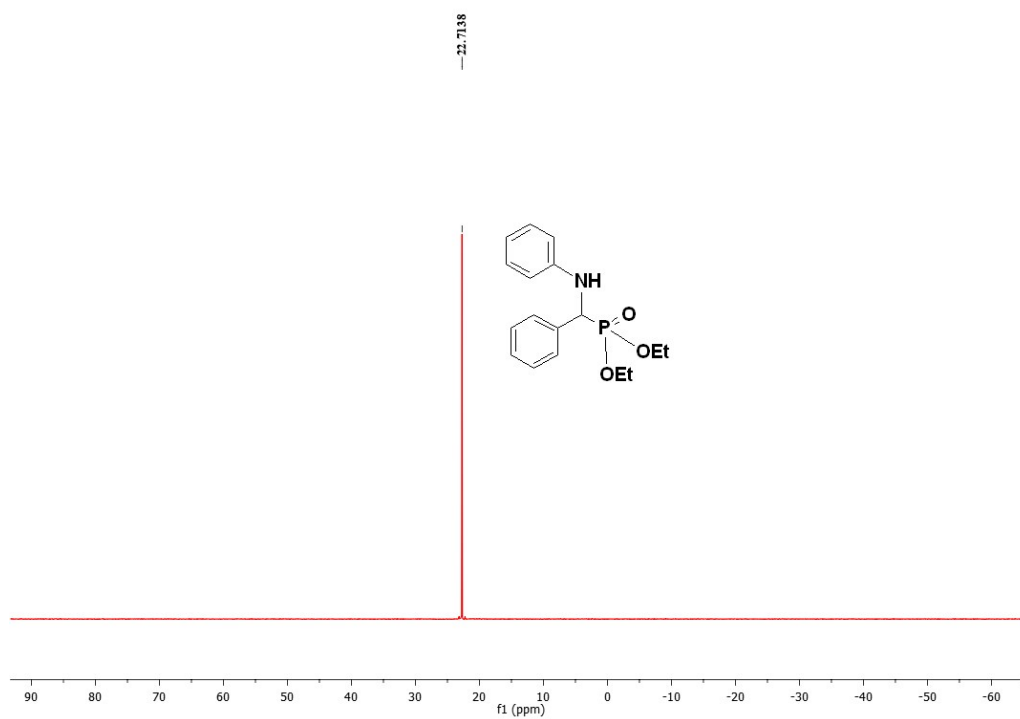

**Fig FS62.** <sup>31</sup>P{<sup>1</sup>H} NMR for compound **5a** in CDCl<sub>3</sub>.

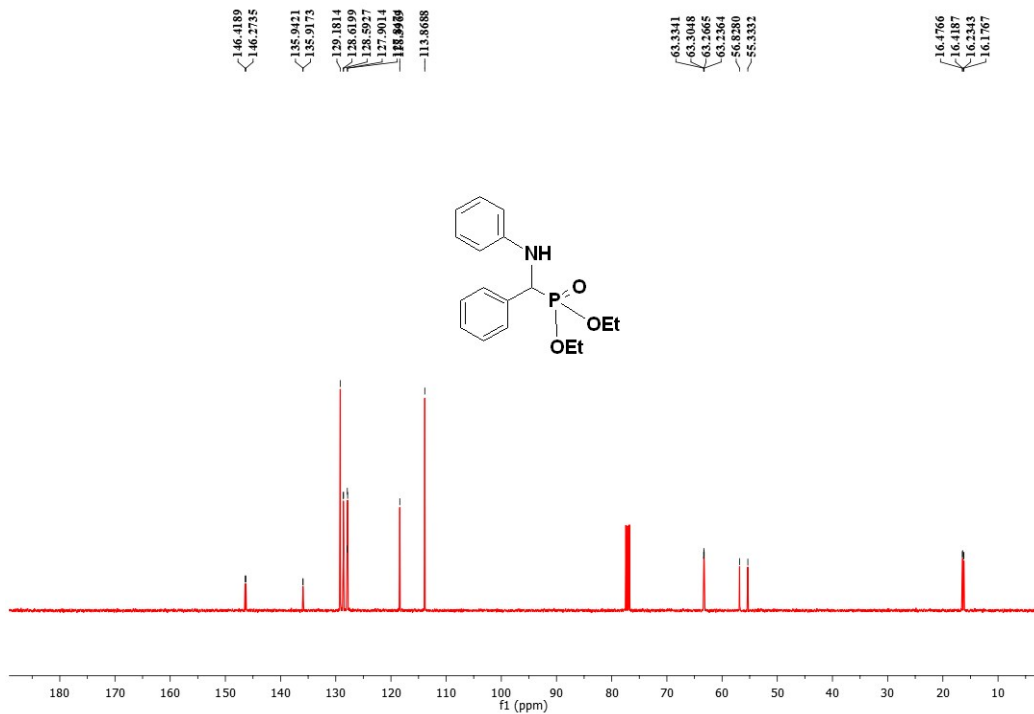

Fig FS63.  $^{13}\text{C}\{^1\text{H}\}$  NMR for compound **5a** in  $\text{CDCl}_3$ .

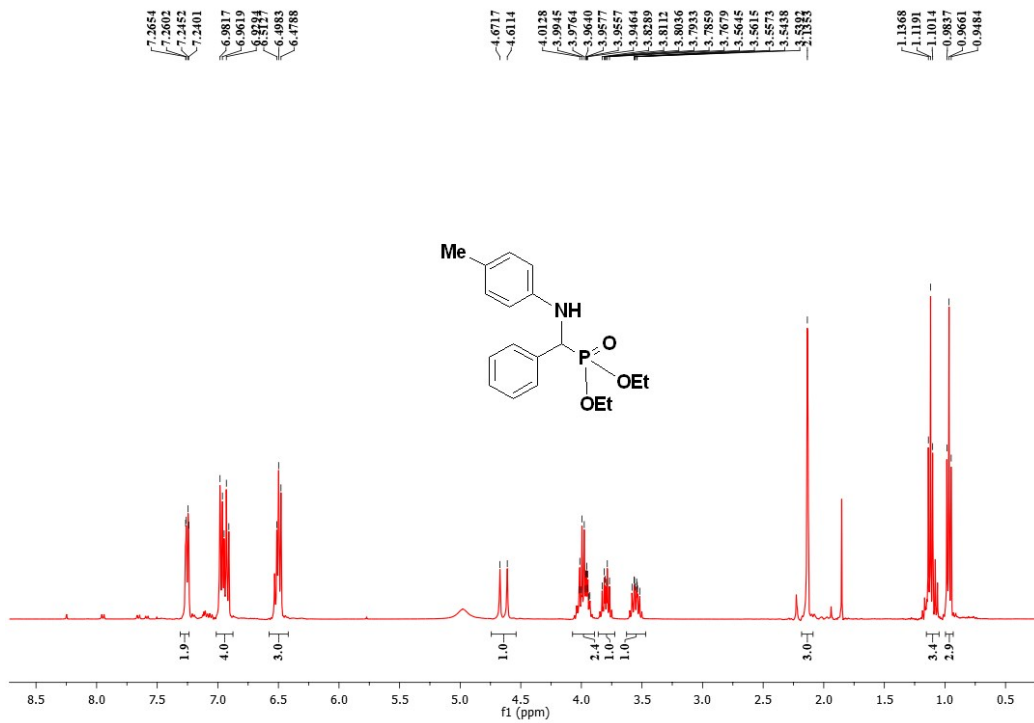

Fig FS64.  $^1\text{H}$  NMR for compound **5b** in  $\text{CDCl}_3$ .

— 22.9802

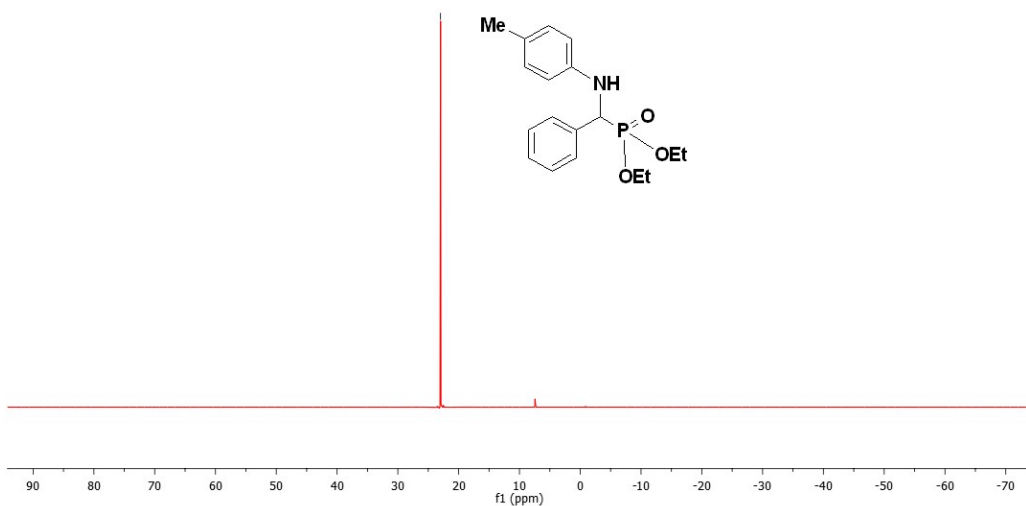

**Fig FS65.**  $^{31}\text{P}\{^1\text{H}\}$  NMR for compound **5b** in  $\text{CDCl}_3$ .

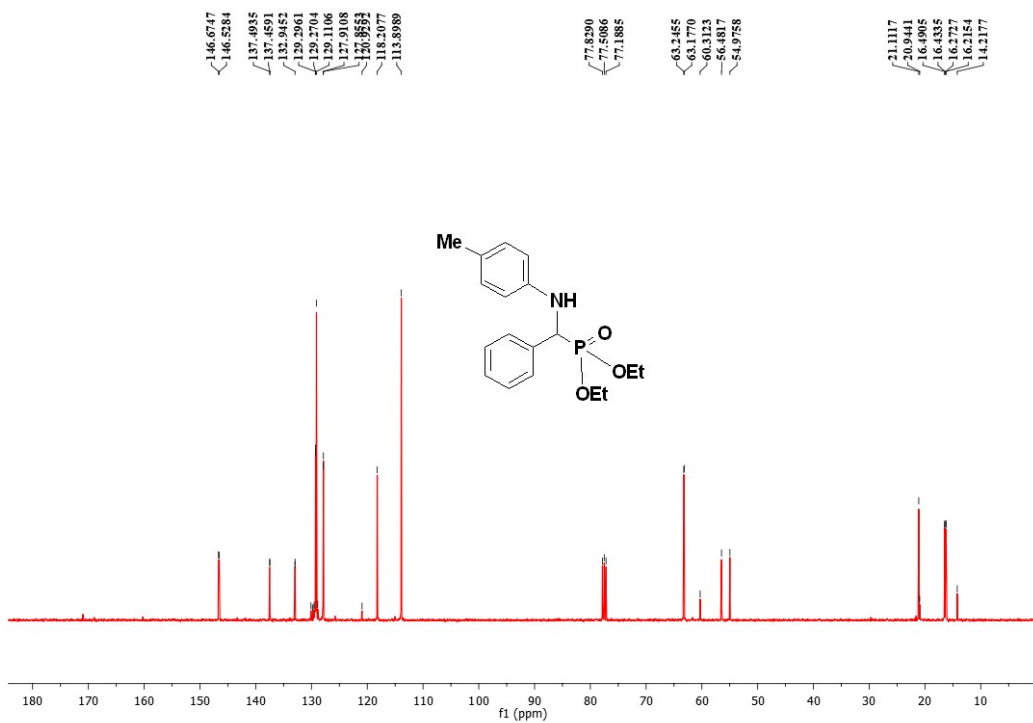

**Fig FS66.**  $^{13}\text{C}\{^1\text{H}\}$  NMR for compound **5b** in  $\text{CDCl}_3$ .

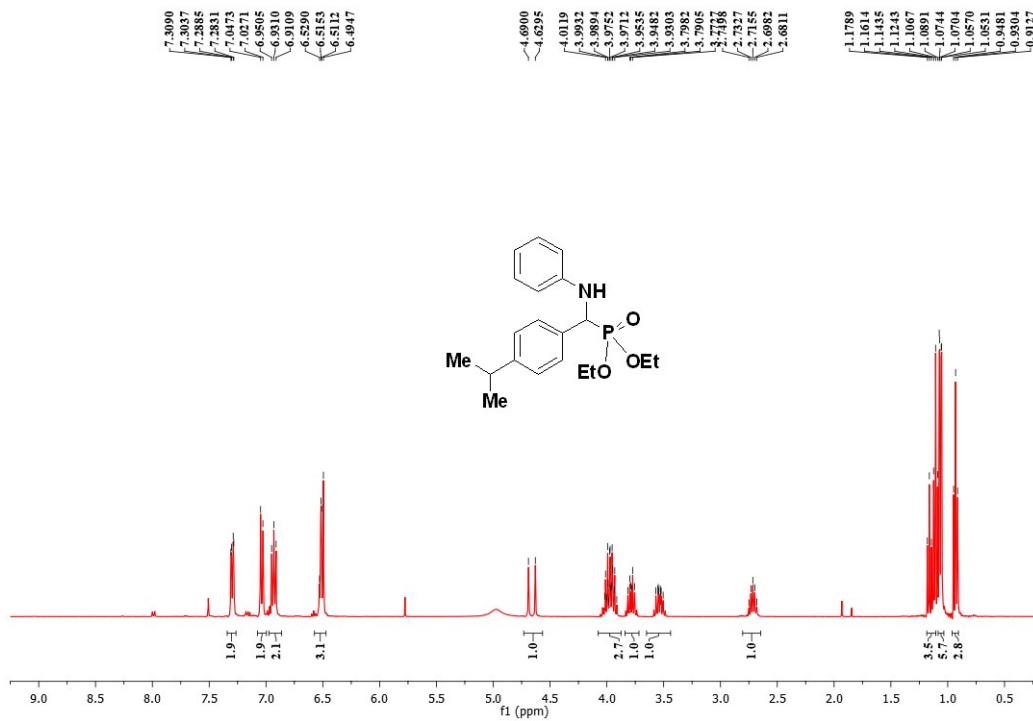

**Fig FS67.** <sup>1</sup>H NMR for compound **5c** in CDCl<sub>3</sub>.

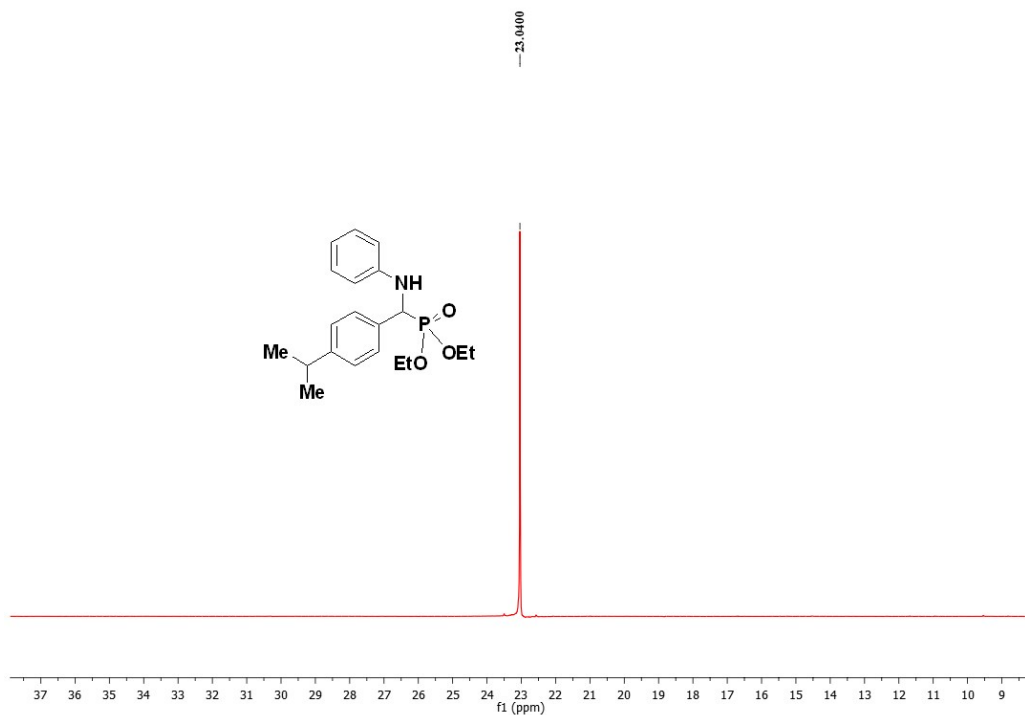

**Fig FS68.** <sup>31</sup>P{<sup>1</sup>H} NMR for compound **5c** in CDCl<sub>3</sub>.

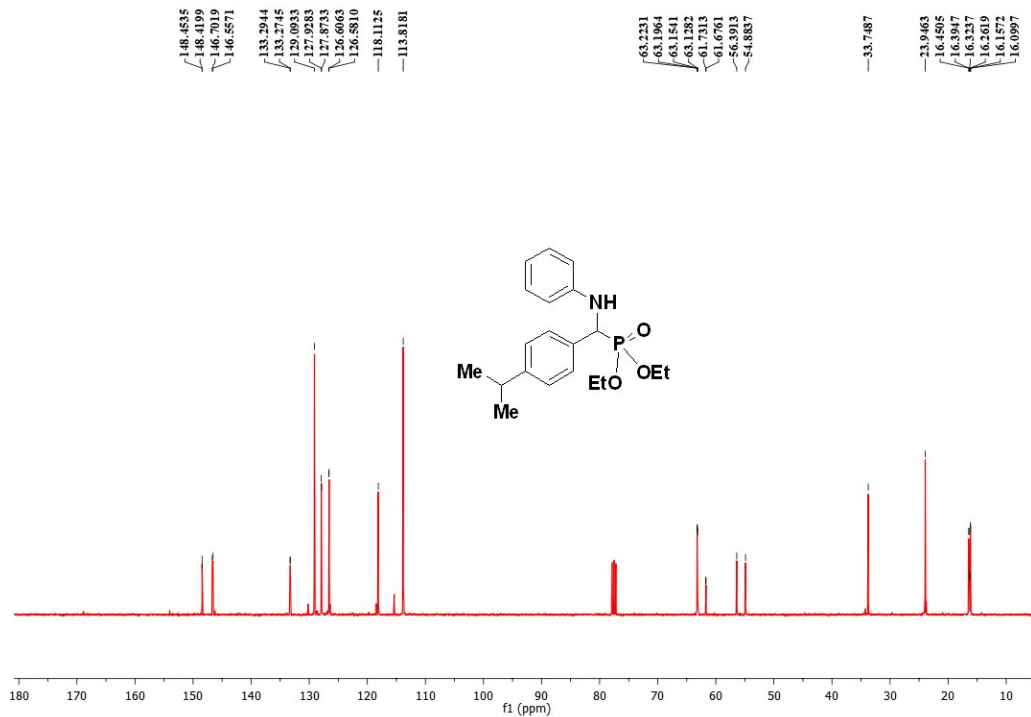

Fig FS69.  $^{13}\text{C}\{^1\text{H}\}$  NMR for compound **5c** in  $\text{CDCl}_3$ .

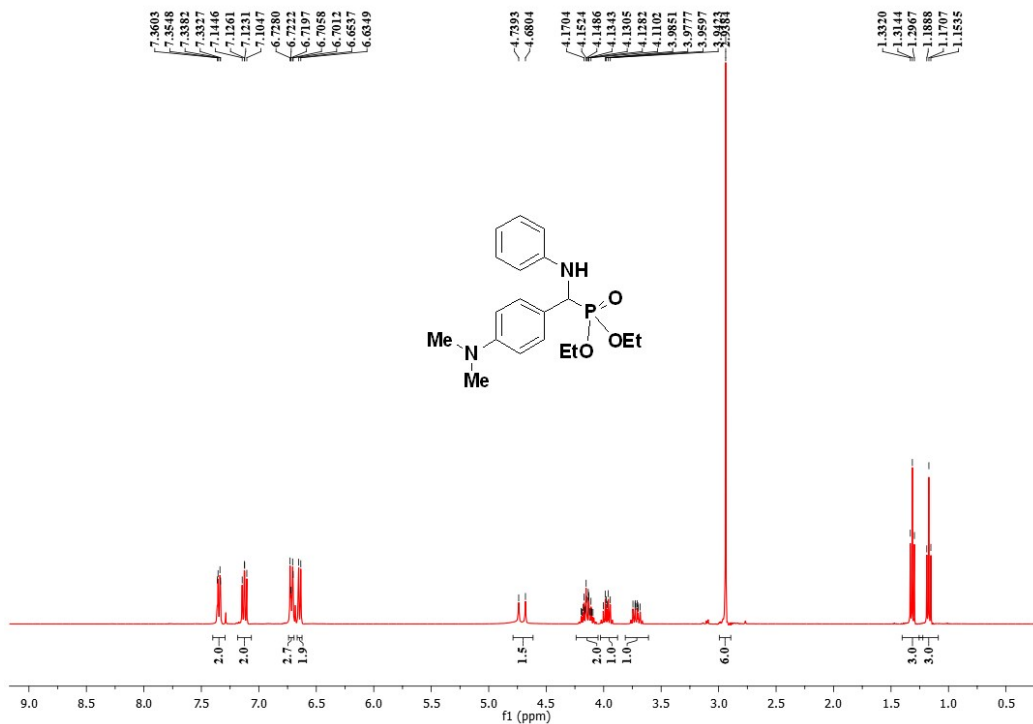

Fig FS70.  $^1\text{H}$  NMR for compound **5d** in  $\text{CDCl}_3$ .

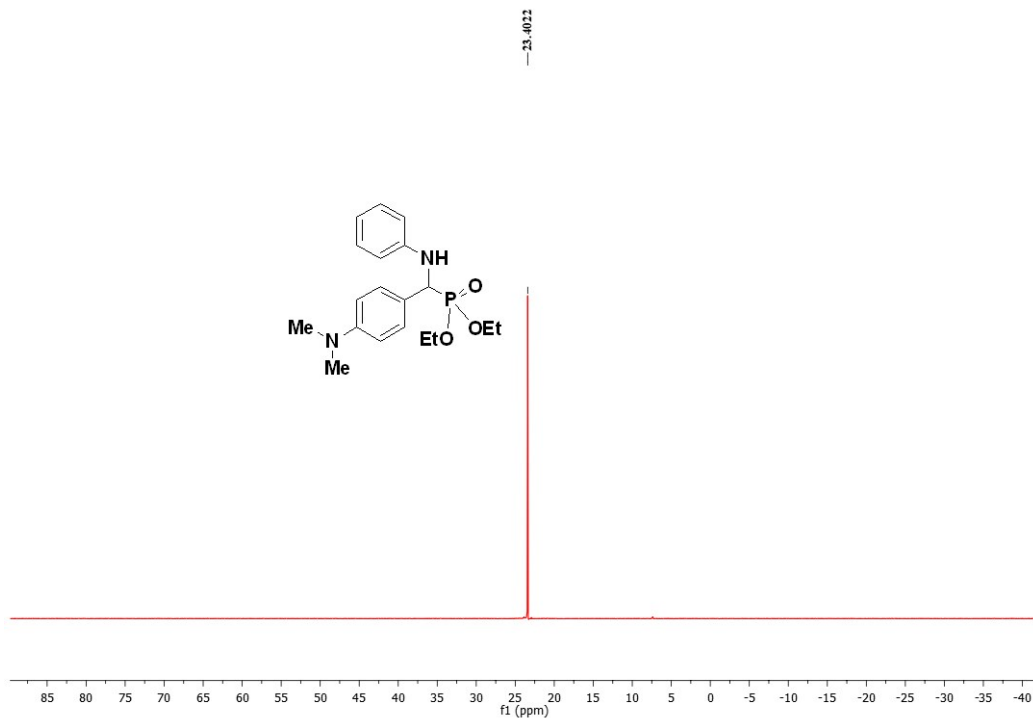

**Fig FS71:**  $^{31}\text{P}\{^1\text{H}\}$  NMR for compound **5d** in  $\text{CDCl}_3$ .

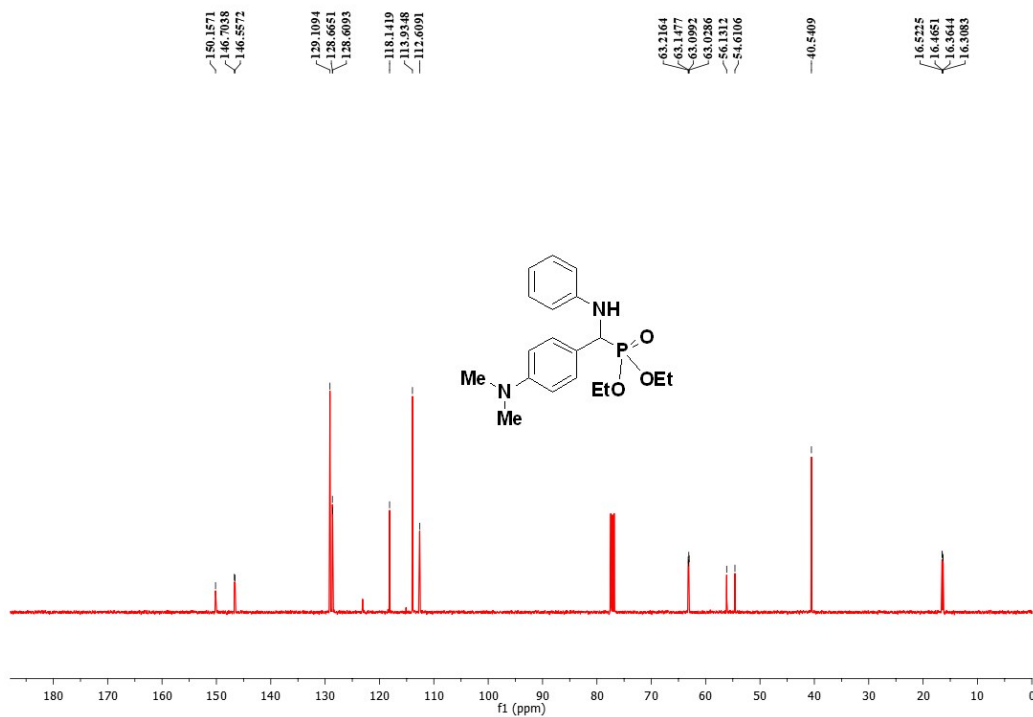

**Fig FS72.**  $^{13}\text{C}\{^1\text{H}\}$  NMR for compound **5d** in  $\text{CDCl}_3$ .

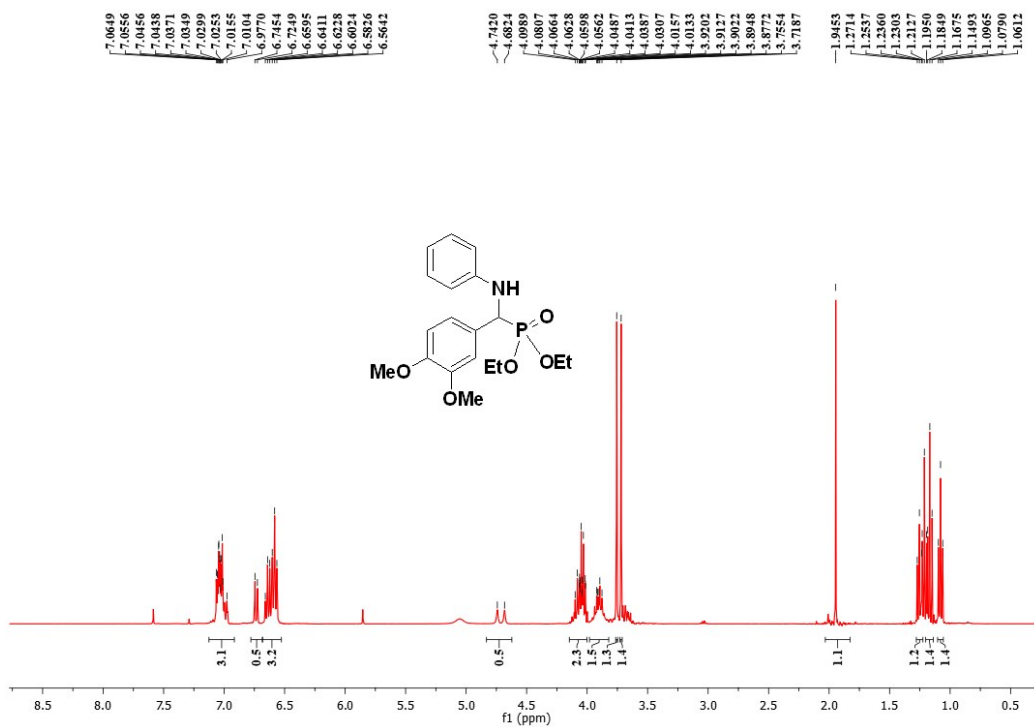

Fig FS73. <sup>1</sup>H NMR for compound 5e in CDCl<sub>3</sub>.

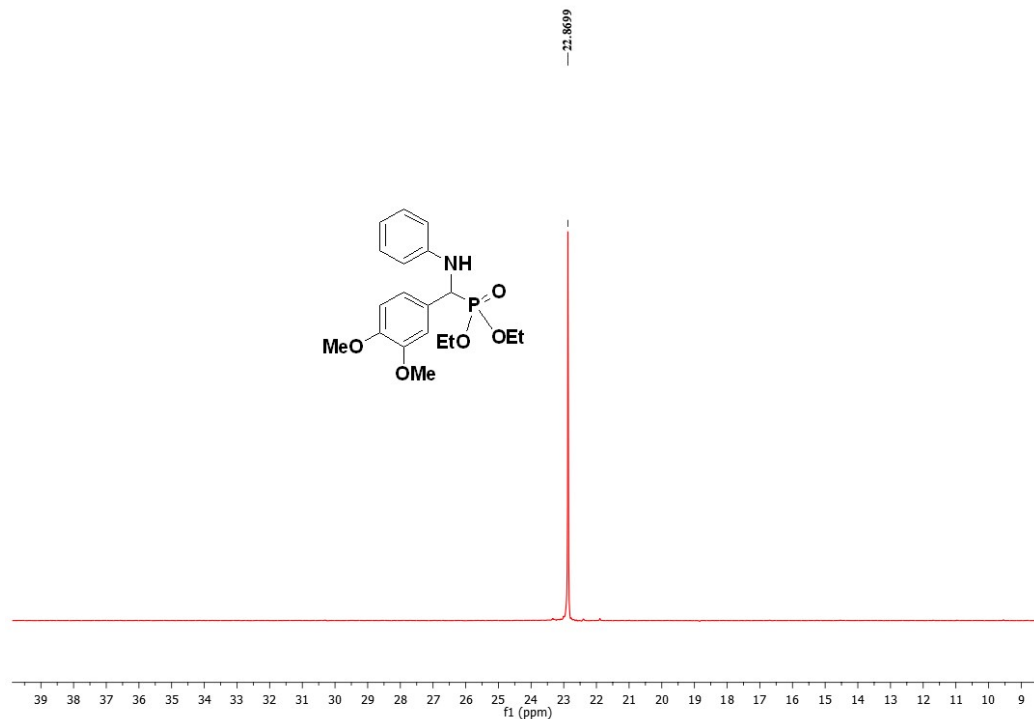

Fig FS74. <sup>31</sup>P{<sup>1</sup>H} NMR for compound 5e in CDCl<sub>3</sub>.

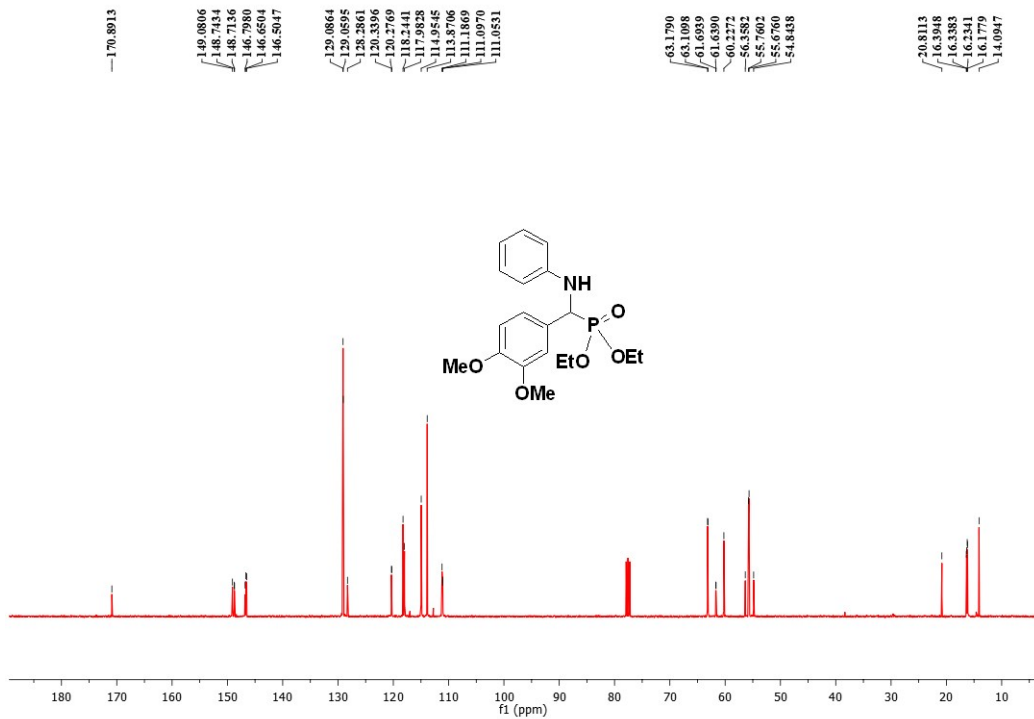

Fig FS75.  $^{13}\text{C}\{^1\text{H}\}$  NMR for compound **5e** in  $\text{CDCl}_3$ .

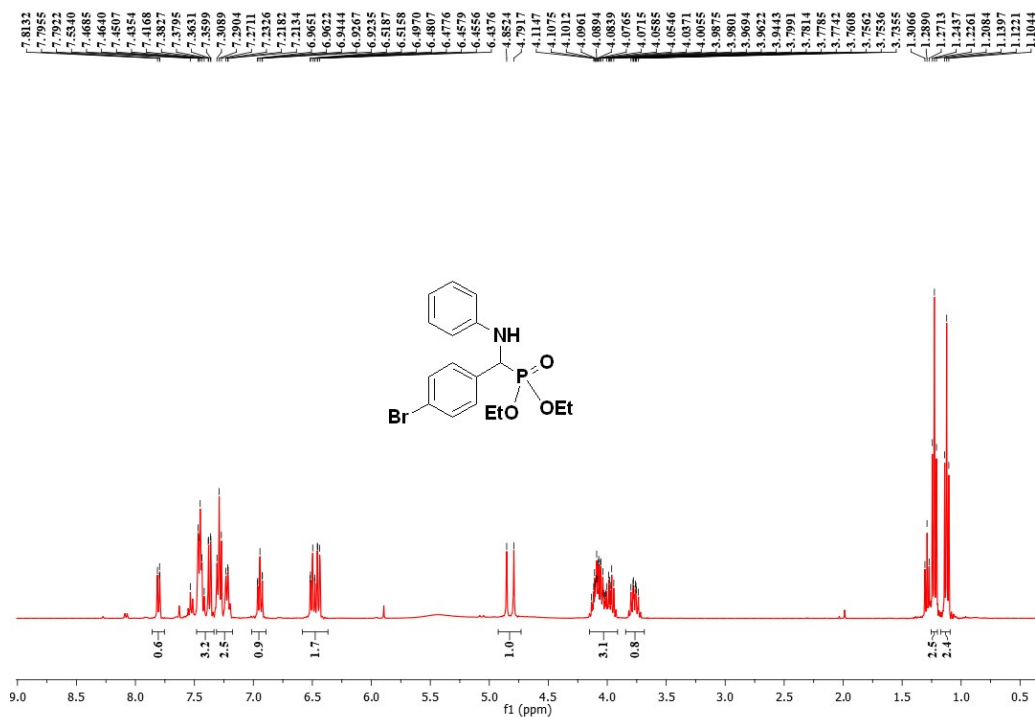

Fig FS76.  $^1\text{H}$  NMR for compound **5f** in  $\text{CDCl}_3$ .



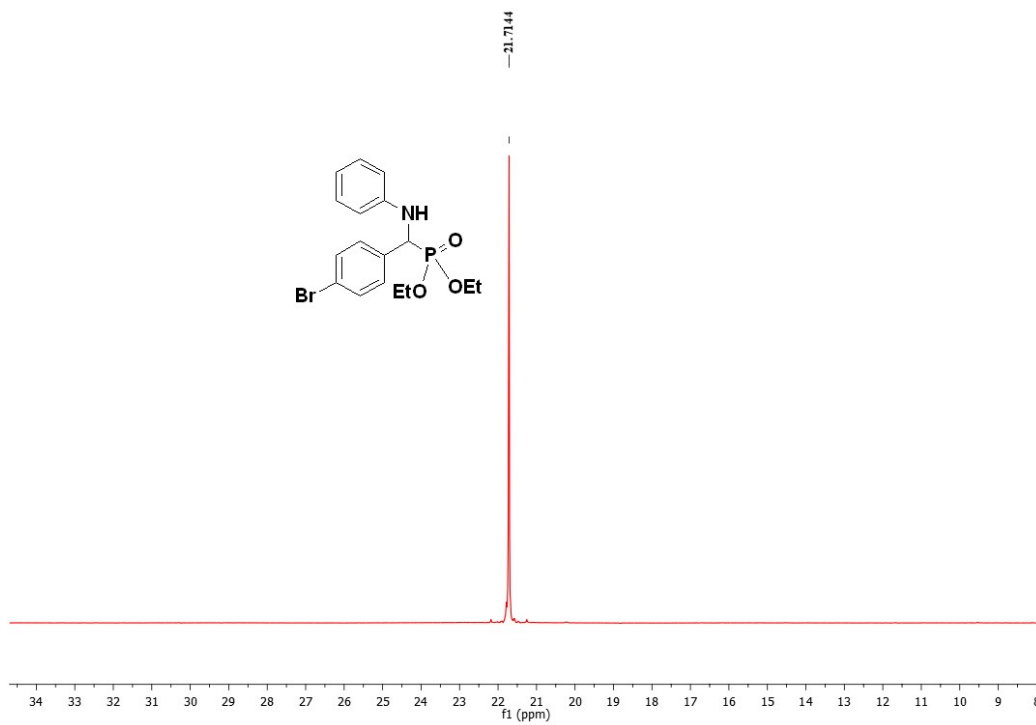

Fig FS77.  $^{31}\text{P}\{^1\text{H}\}$  NMR for compound **5f** in  $\text{CDCl}_3$ .

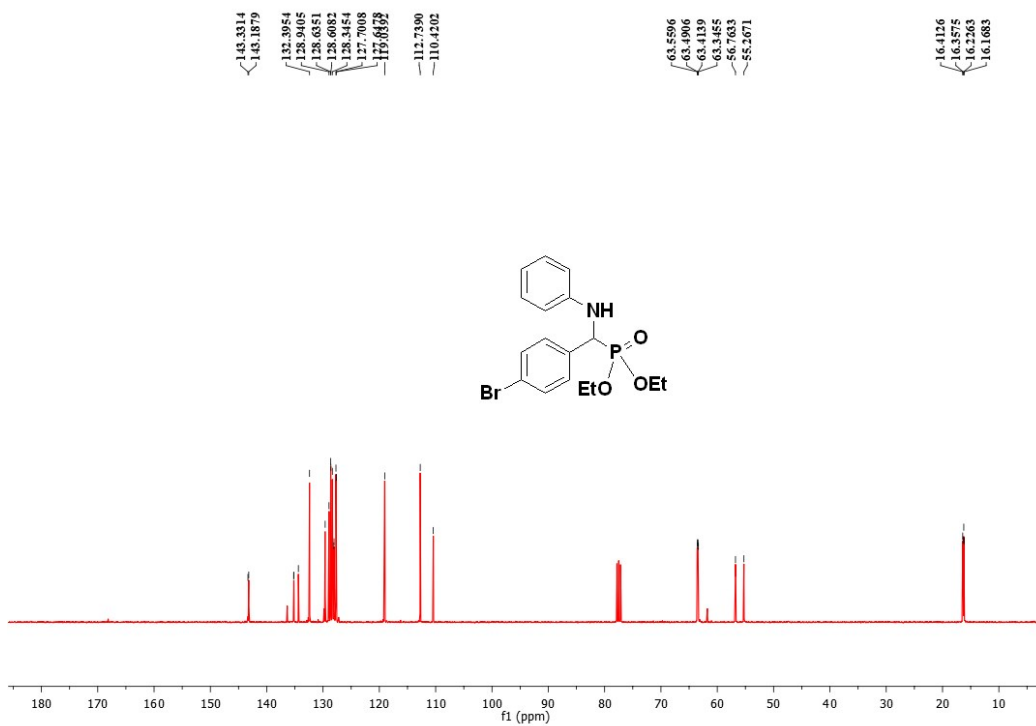

Fig FS78.  $^{13}\text{C}\{^1\text{H}\}$  NMR for compound **5f** in  $\text{CDCl}_3$ .

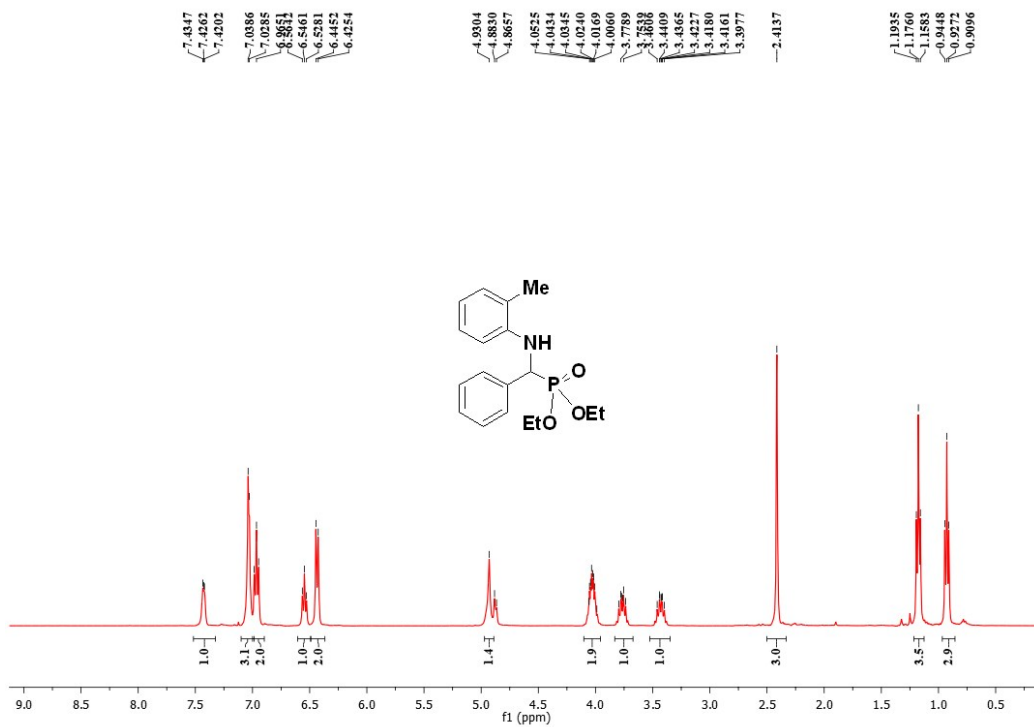

**Fig FS79.** <sup>1</sup>H NMR for compound **5g** in CDCl<sub>3</sub>.

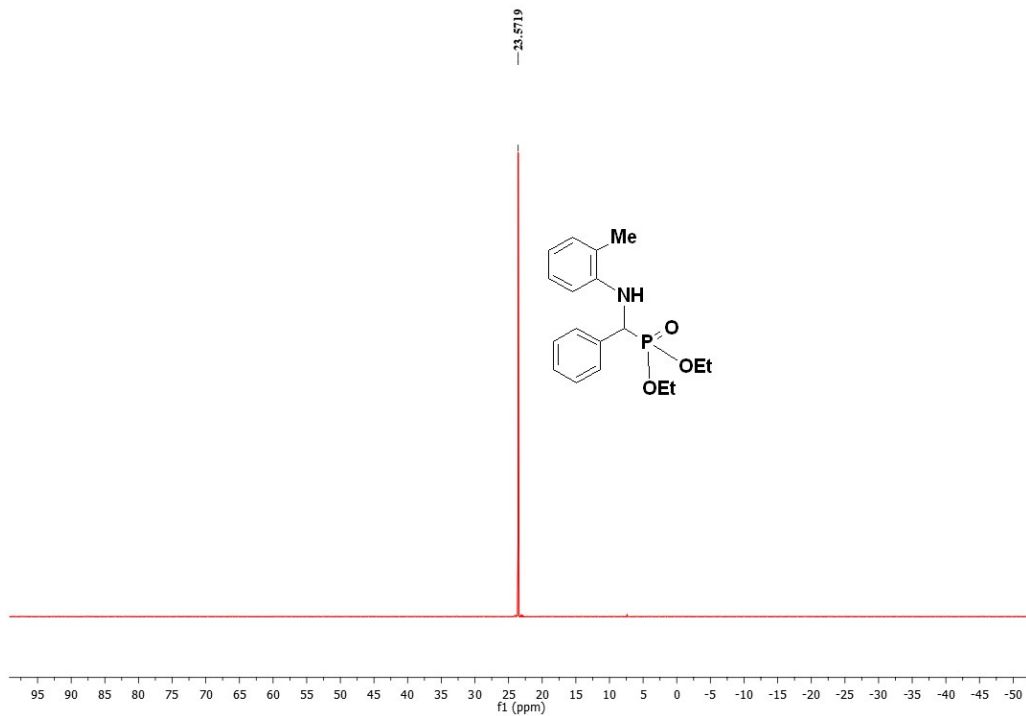

**Fig FS80.** <sup>31</sup>P {<sup>1</sup>H} NMR for compound **5g** in CDCl<sub>3</sub>.

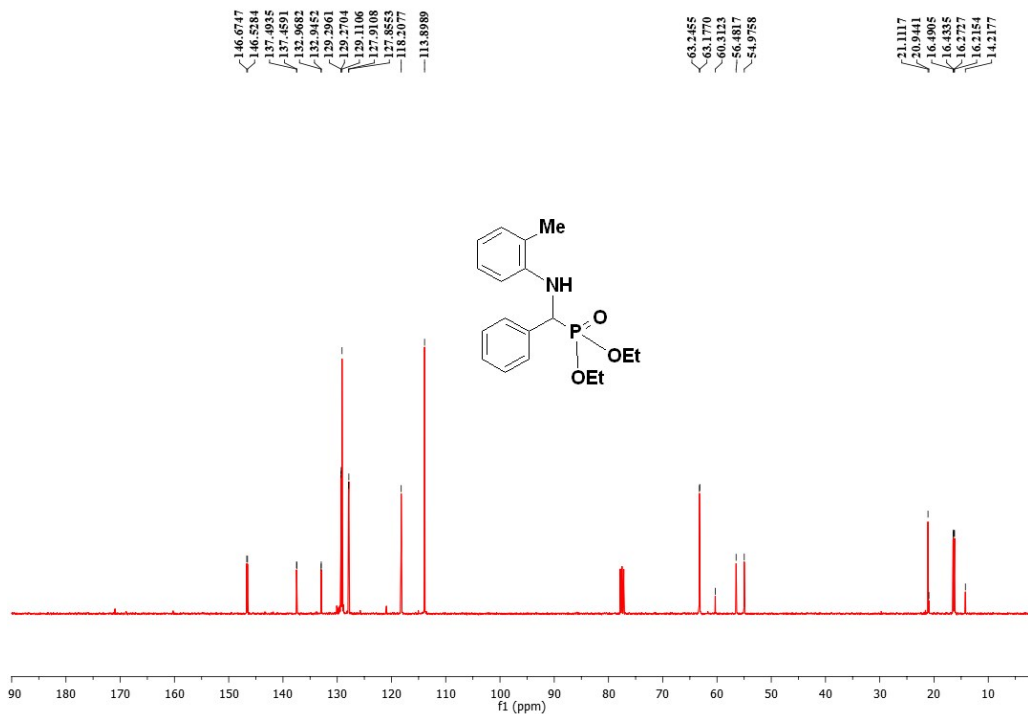

Fig FS81.  $^{13}\text{C}\{^1\text{H}\}$  NMR for compound **5g** in  $\text{CDCl}_3$ .

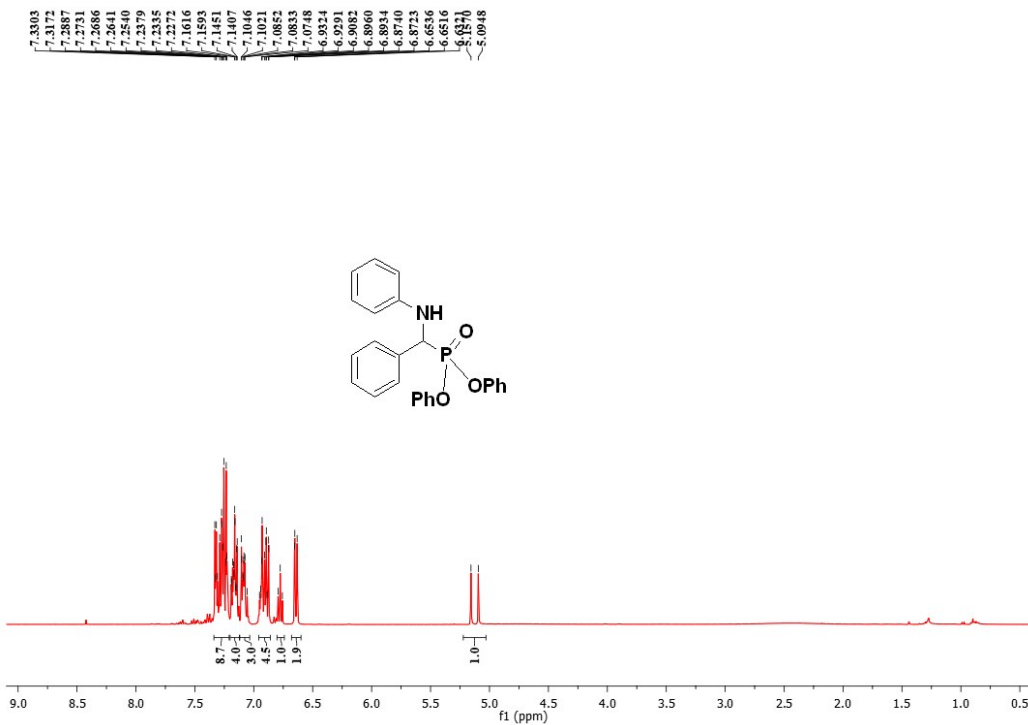

Fig FS82.  $^1\text{H}$  NMR for compound **6a** in  $\text{CDCl}_3$ .

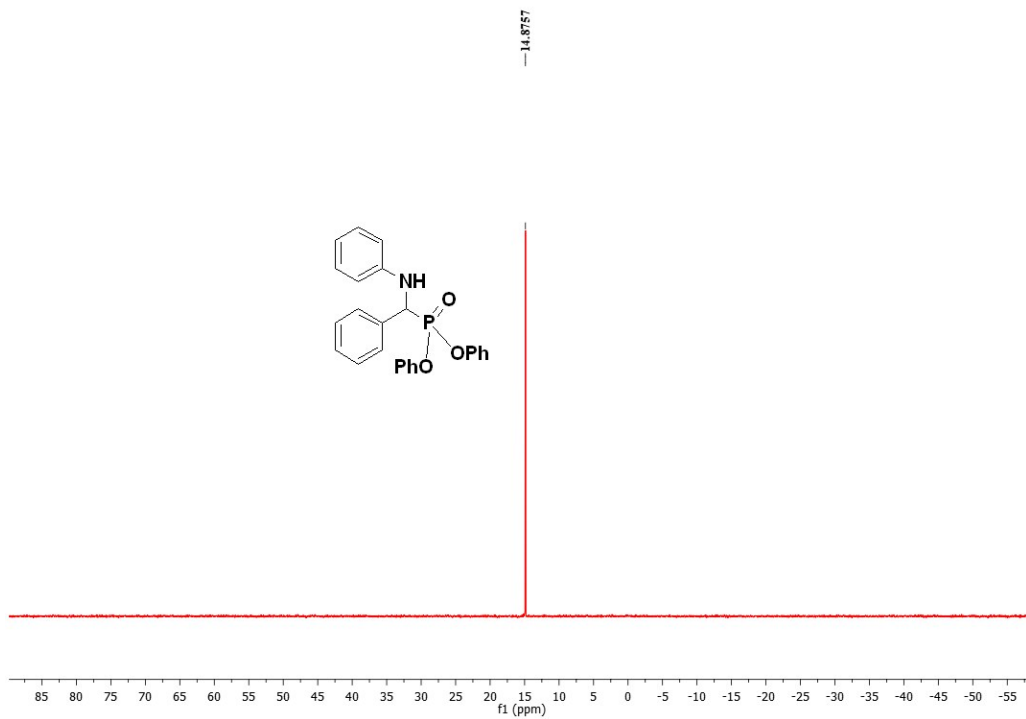

Fig FS83.  $^{31}\text{P}\{^1\text{H}\}$  NMR for compound **6a** in  $\text{CDCl}_3$ .

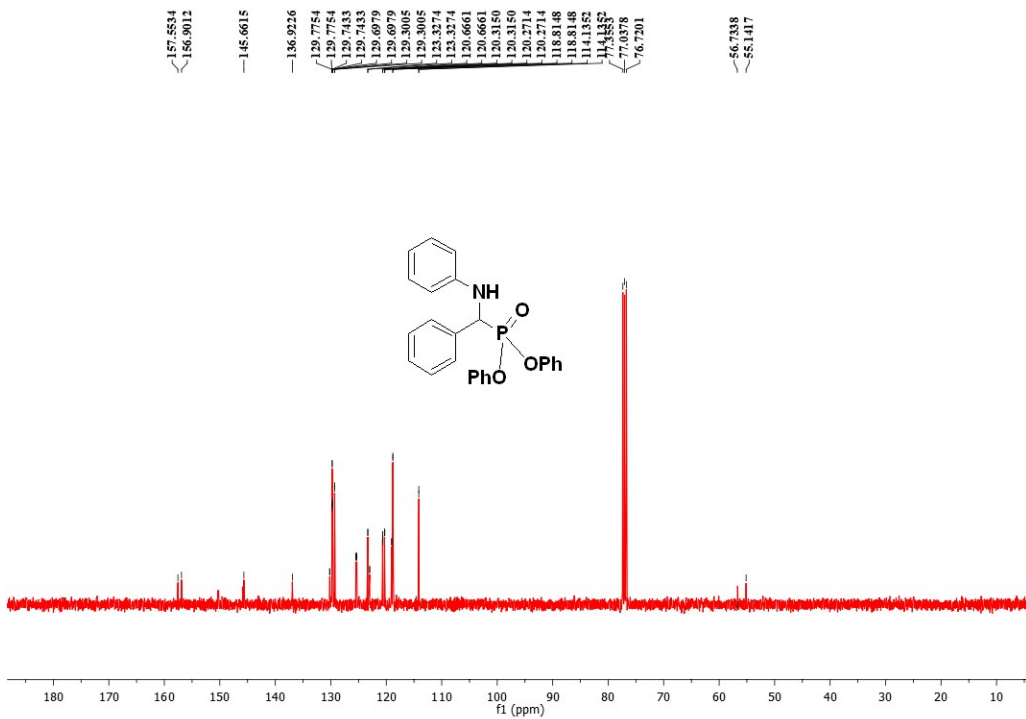

Fig FS84.  $^{13}\text{C}\{^1\text{H}\}$  NMR for compound **6a** in  $\text{CDCl}_3$ .

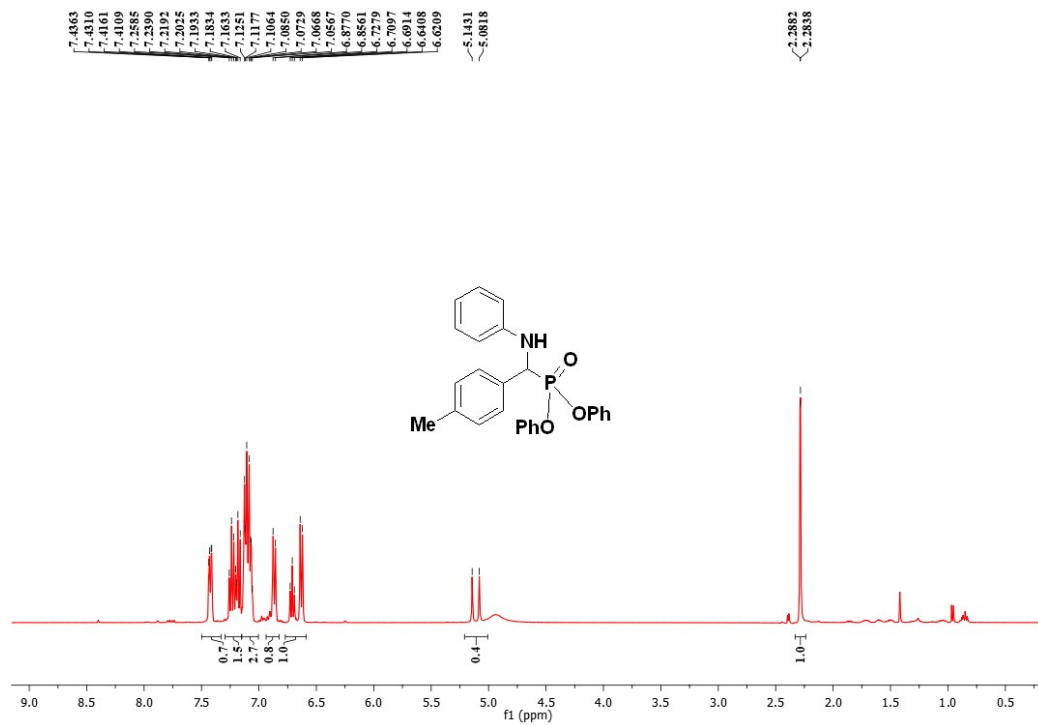

Fig FS85.  $^1\text{H}$  NMR for compound **6b** in  $\text{CDCl}_3$ .

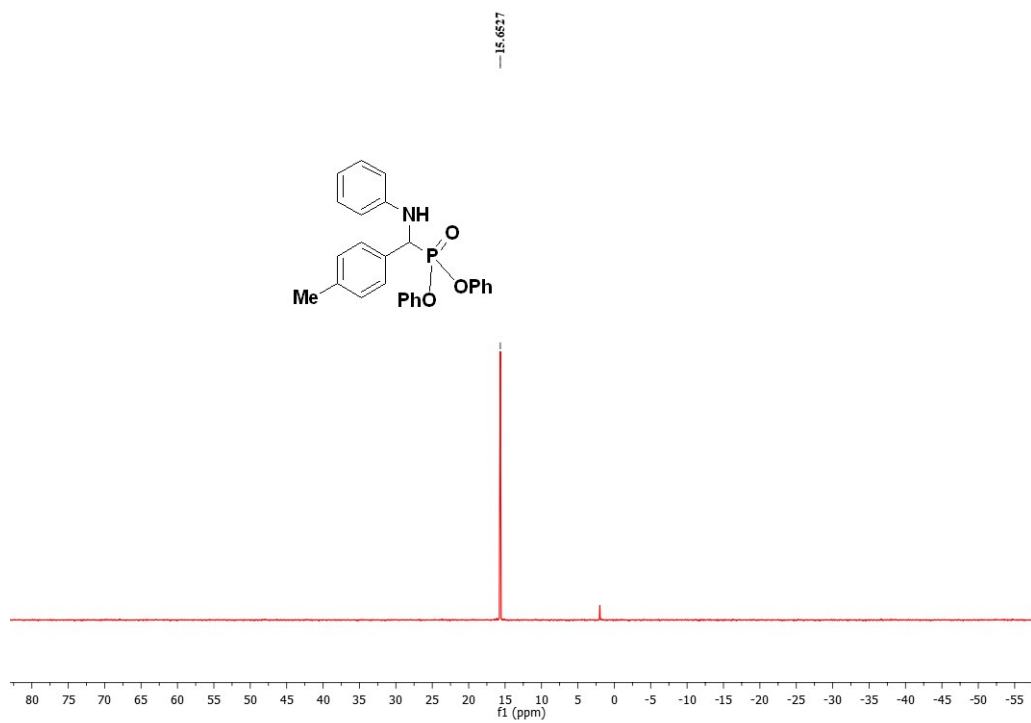

Fig FS86.  $^{31}\text{P}\{^1\text{H}\}$  NMR for compound **6b** in  $\text{CDCl}_3$ .

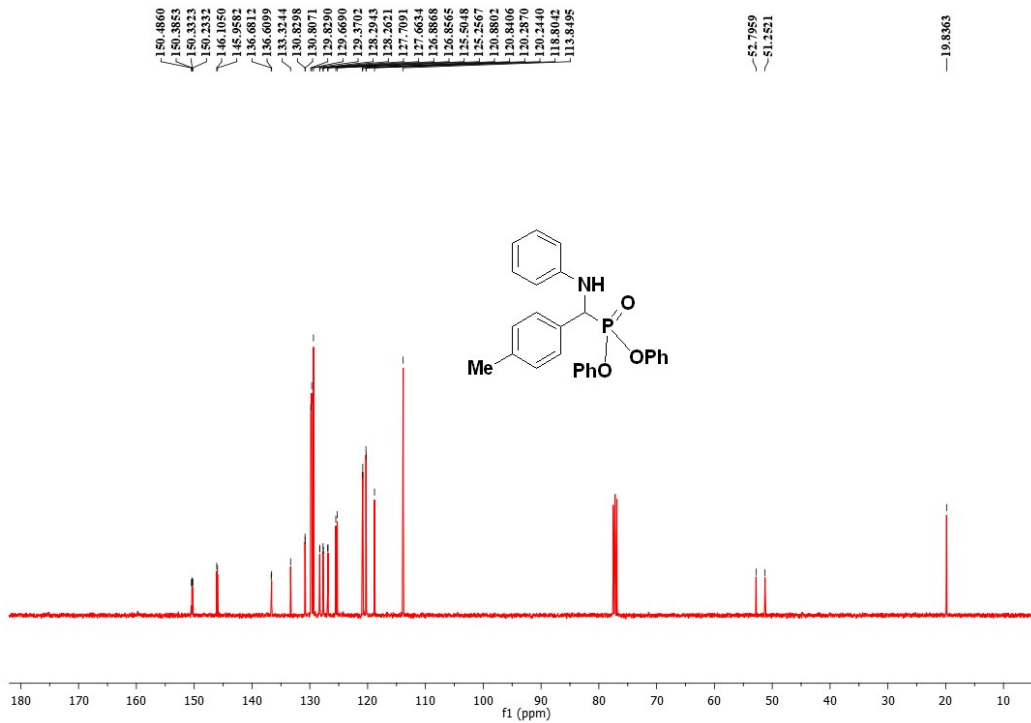

Fig FS87.  $^{13}\text{C}\{^1\text{H}\}$  NMR for compound **6b** in  $\text{CDCl}_3$ .

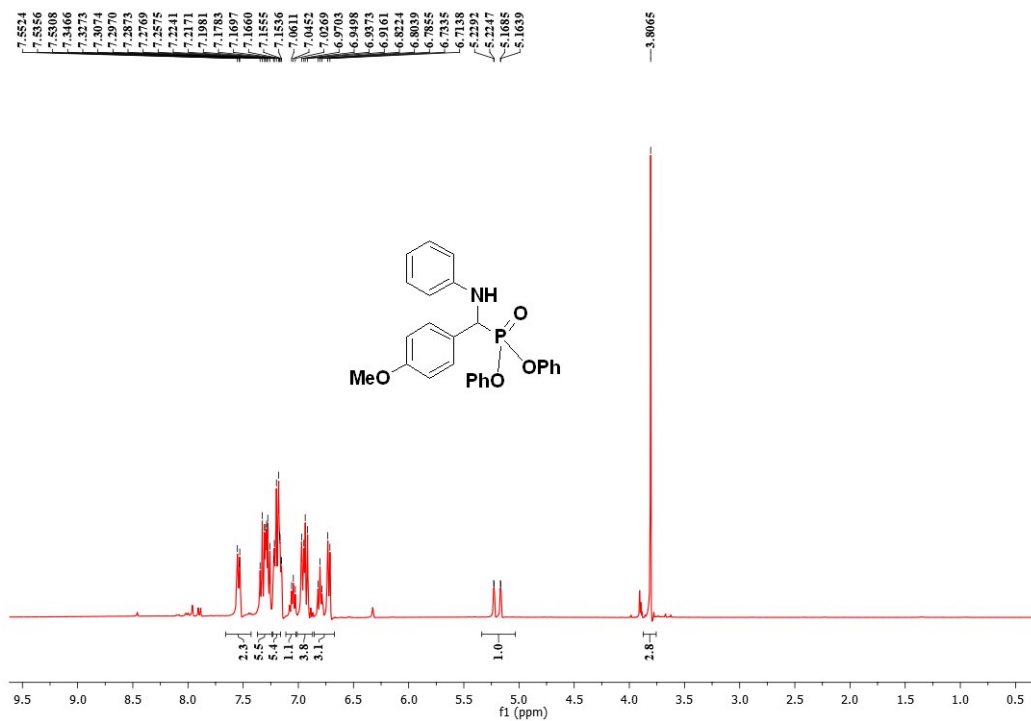

Fig FS88.  $^1\text{H}$  NMR for compound **6c** in  $\text{CDCl}_3$ .

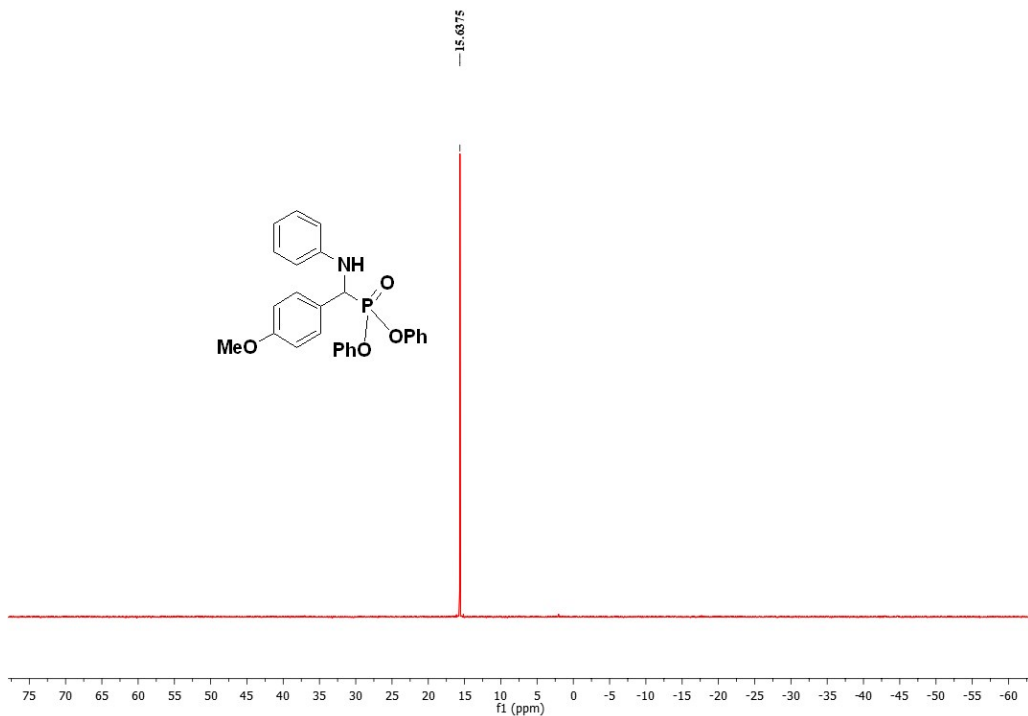

Fig FS89.  $^{31}\text{P}\{^1\text{H}\}$  NMR for compound **6c** in  $\text{CDCl}_3$ .

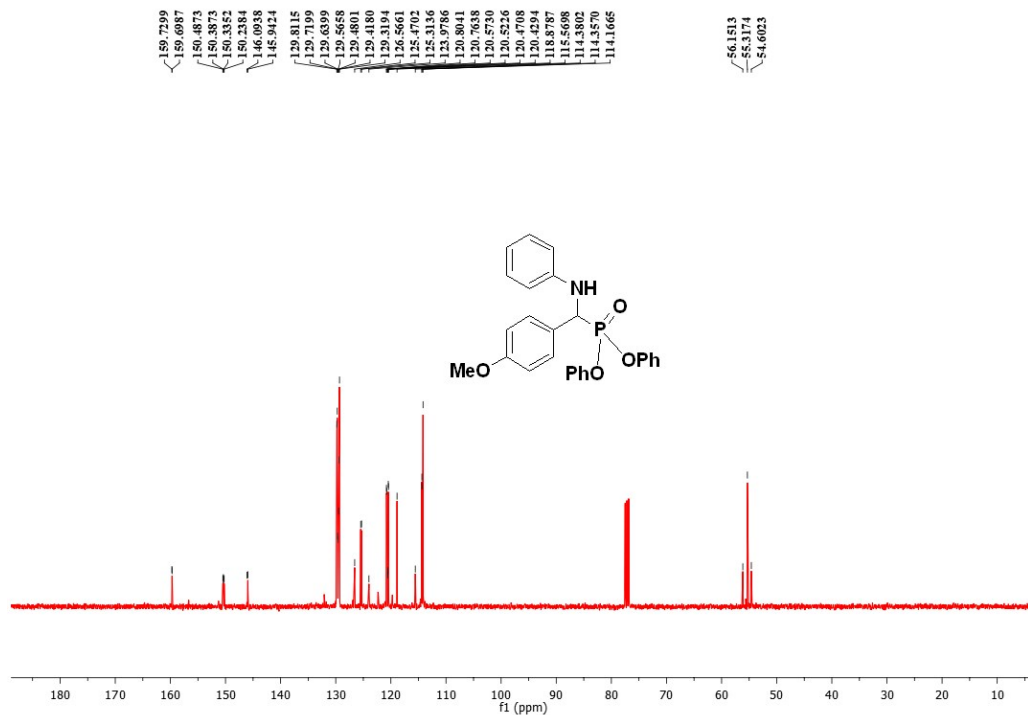

Fig FS90.  $^{13}\text{C}\{^1\text{H}\}$  NMR for compound **6c** in  $\text{CDCl}_3$ .

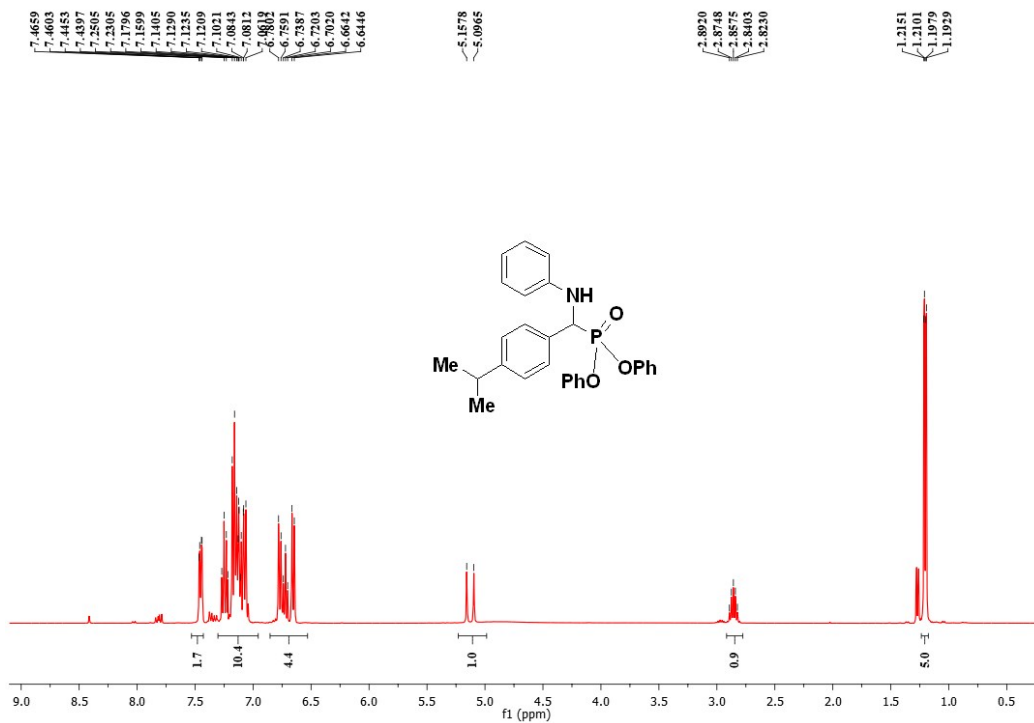

**Fig FS91.**  $^1\text{H}$  NMR for compound **6d** in  $\text{CDCl}_3$ .

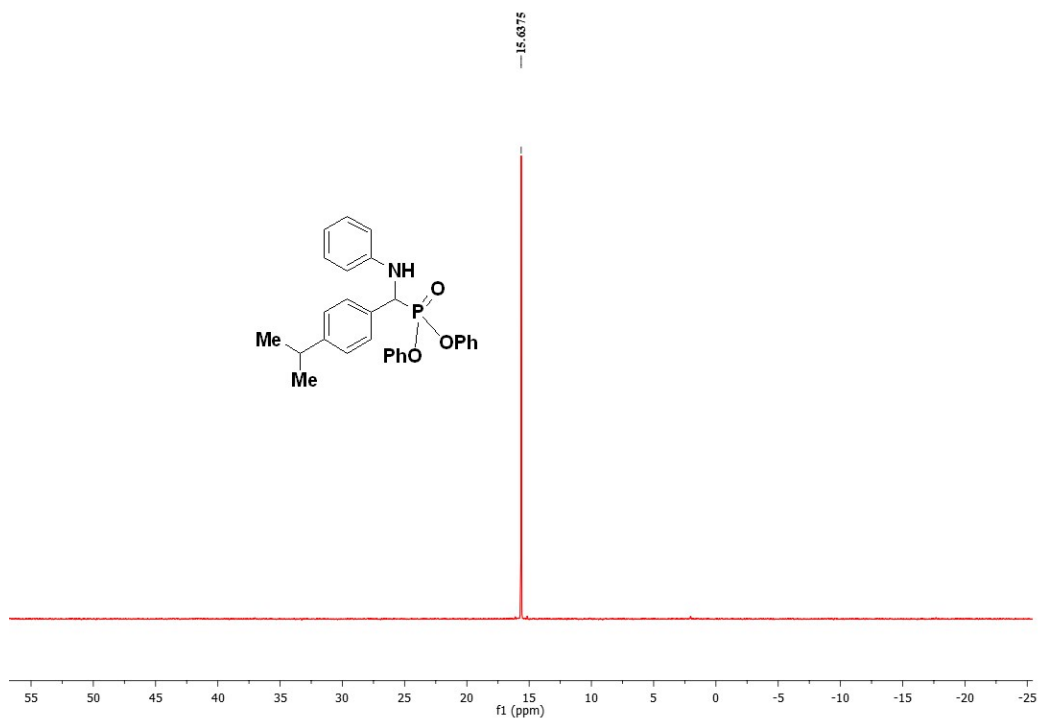

**Fig FS92.**  $^{13}\text{C}\{^1\text{H}\}$  NMR for compound **6d** in  $\text{CDCl}_3$ .



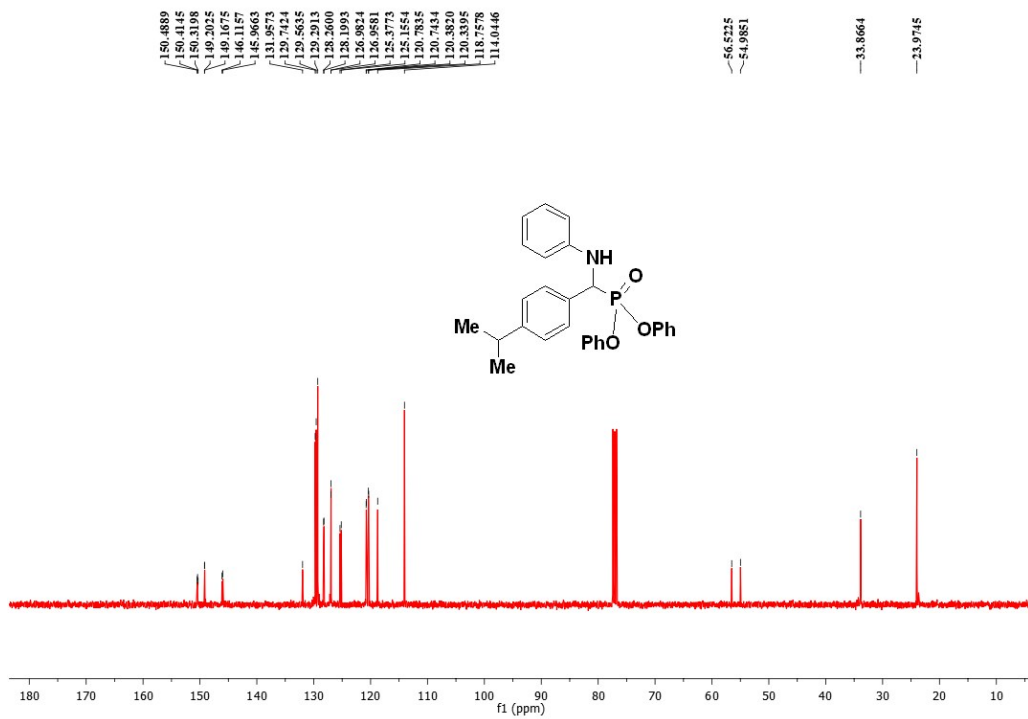

Fig FS93.  $^{13}\text{C}\{^1\text{H}\}$  NMR for compound **6d** in  $\text{CDCl}_3$ .

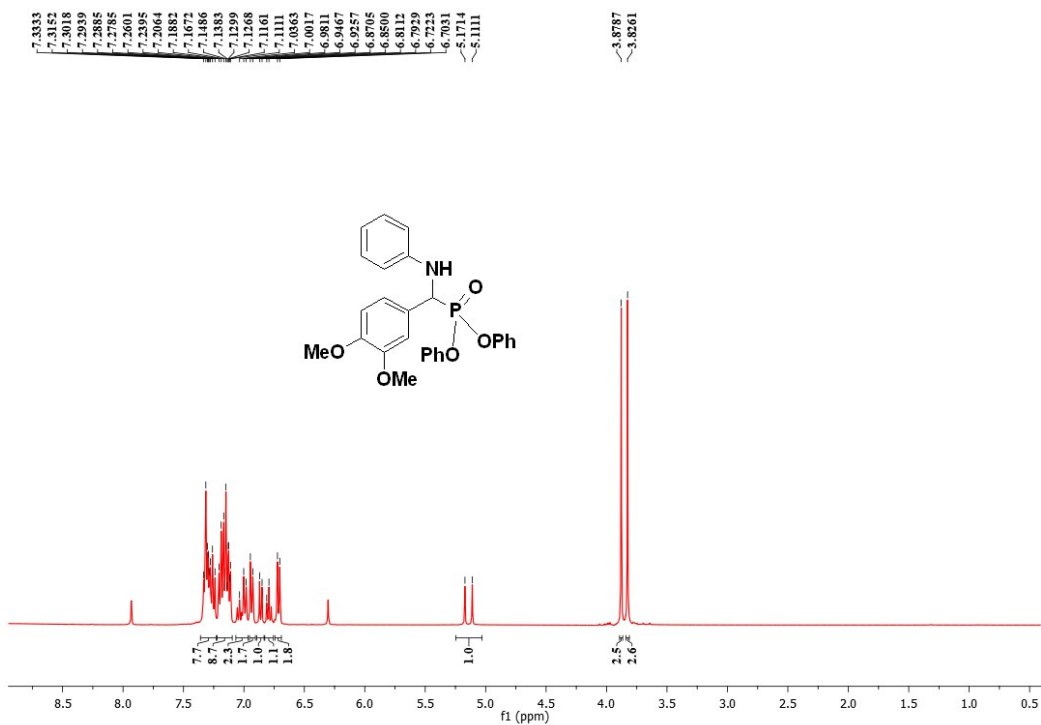

Fig FS94.  $^1\text{H}$  NMR for compound **6e** in  $\text{CDCl}_3$ .

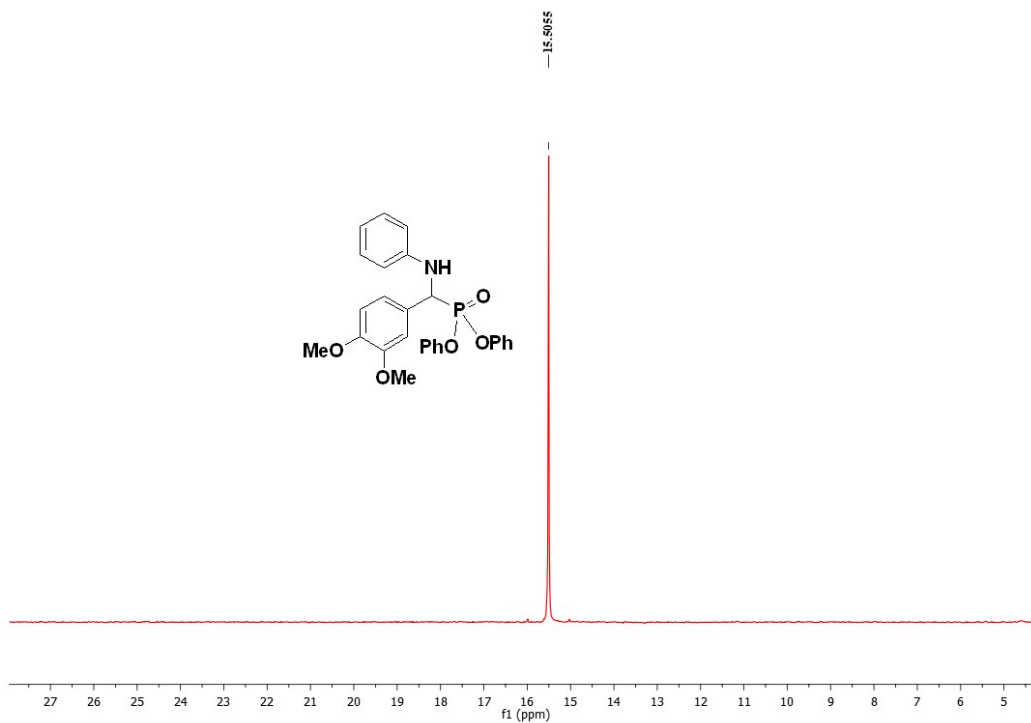

Fig FS95.  $^{31}\text{P}\{^1\text{H}\}$  NMR for compound 6e in  $\text{CDCl}_3$ .

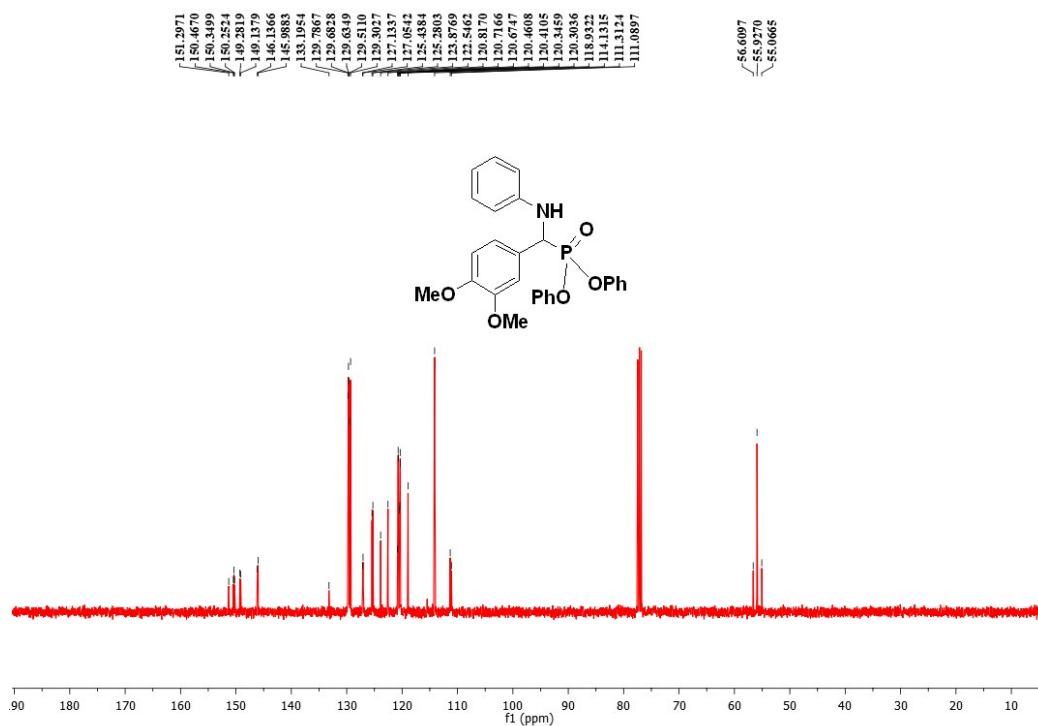

Fig FS96.  $^{13}\text{C}\{^1\text{H}\}$  NMR for compound 6e in  $\text{CDCl}_3$ .

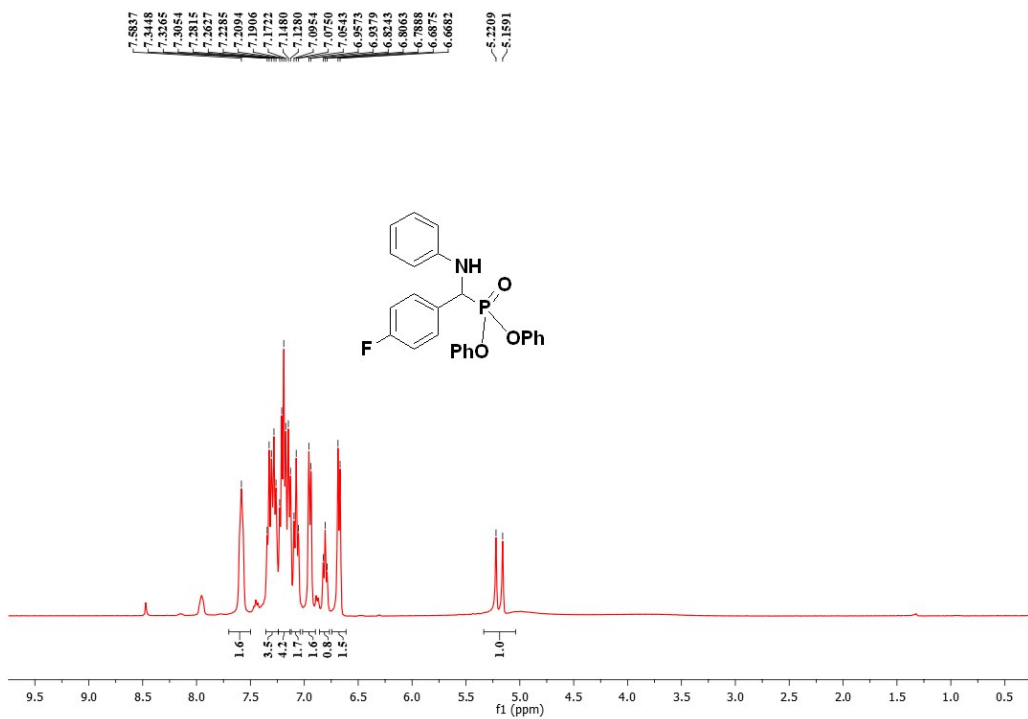

**Fig FS97.**  $^1\text{H}$  NMR for compound **6f** in  $\text{CDCl}_3$ .

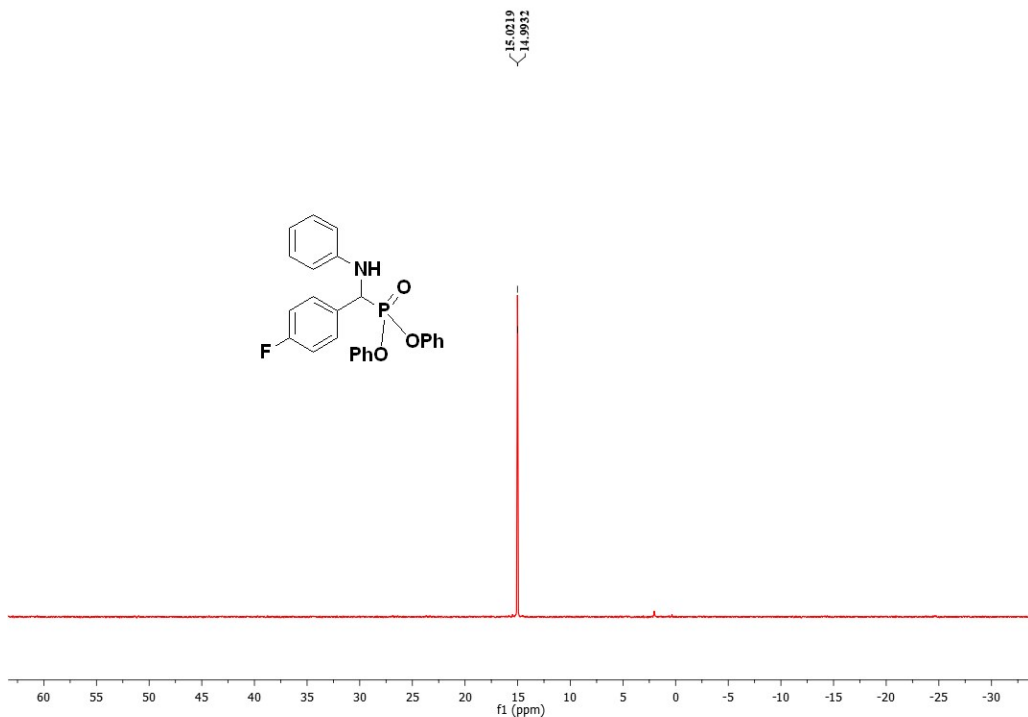

**Fig FS98.**  $^{31}\text{P}\{^1\text{H}\}$  NMR for compound **6f** in  $\text{CDCl}_3$ .

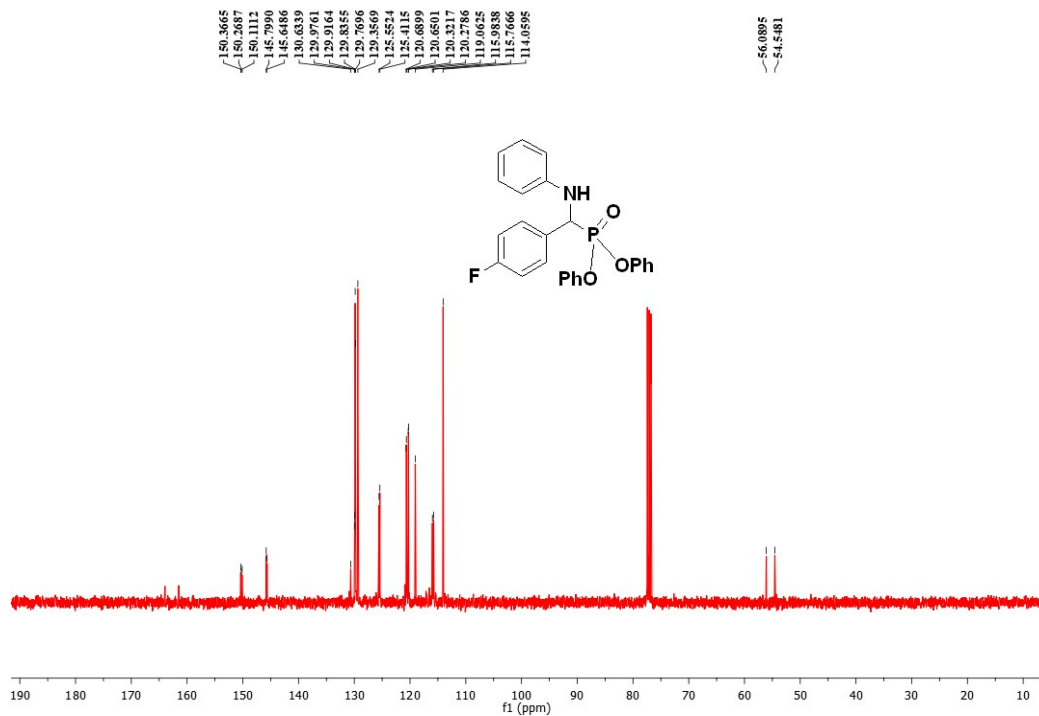

Fig FS99.  $^{13}\text{C}\{^1\text{H}\}$  NMR for compound **6f** in  $\text{CDCl}_3$ .

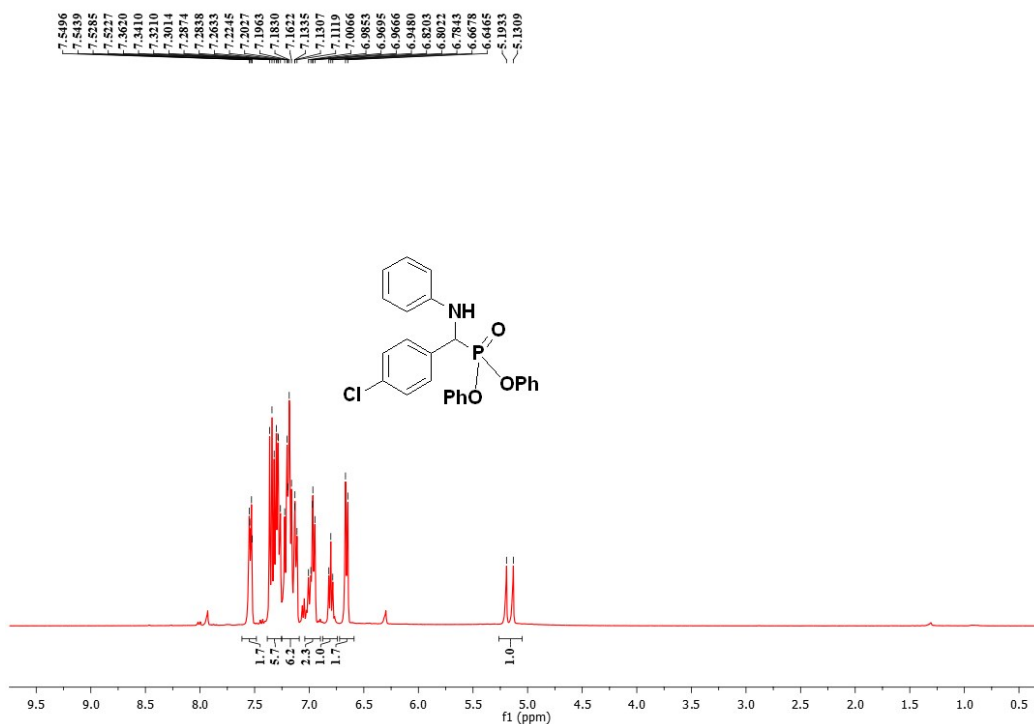

Fig FS100.  $^1\text{H}$  NMR for compound **6g** in  $\text{CDCl}_3$ .

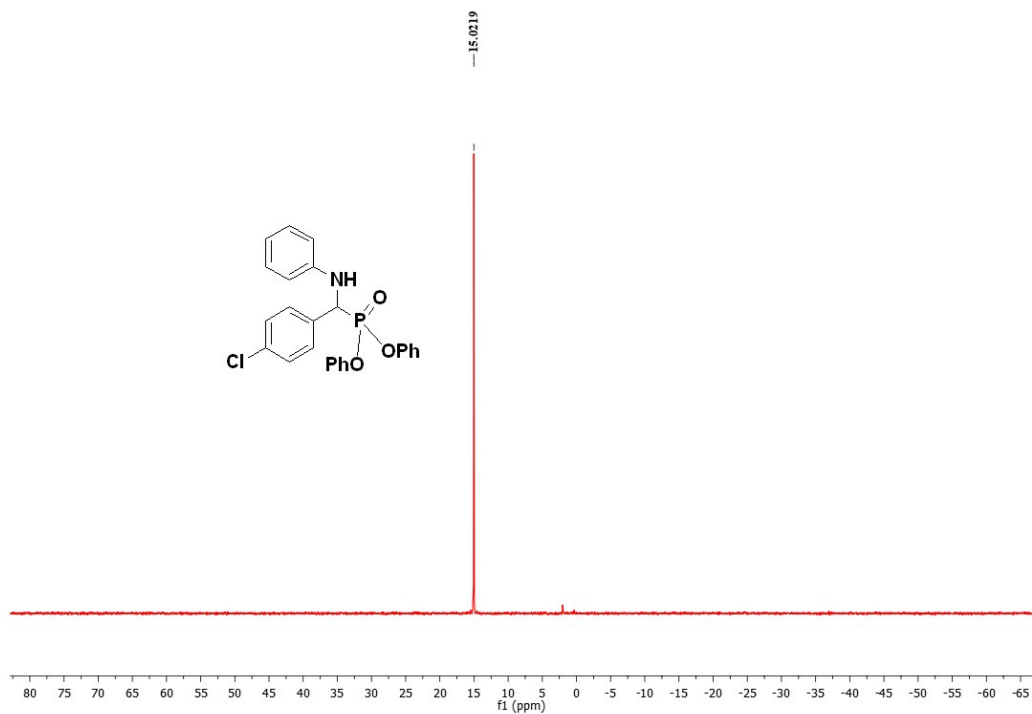

**Fig FS101.**  $^{31}\text{P}$   $\{^1\text{H}\}$  NMR for compound **6g** in  $\text{CDCl}_3$ .

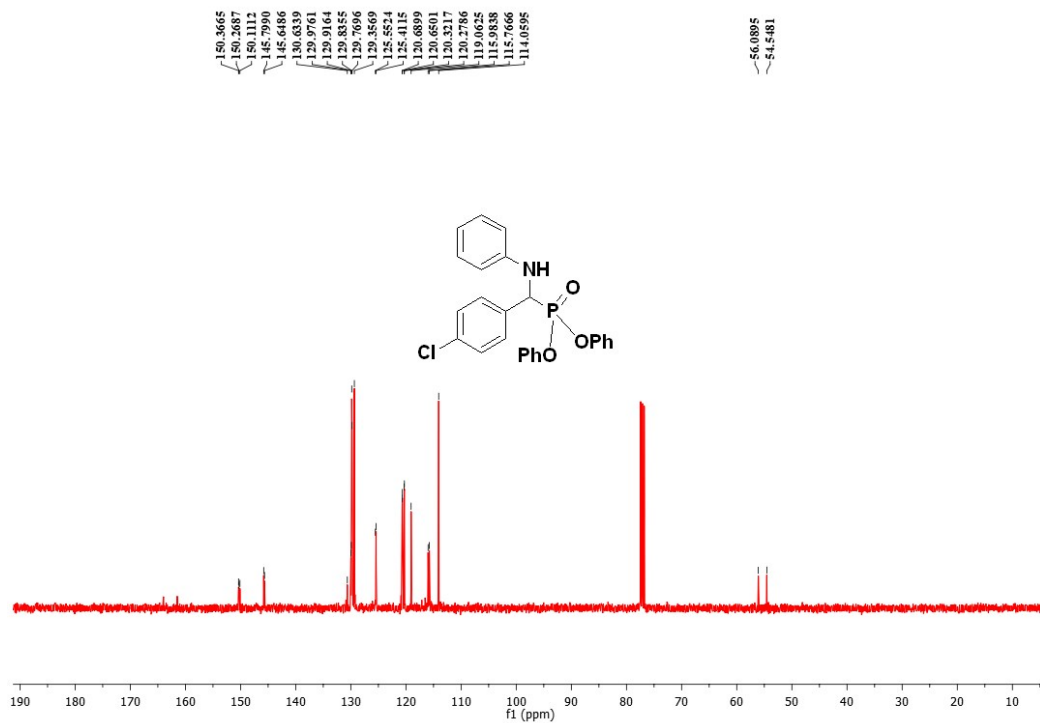

**Fig FS102.**  $^{13}\text{C}$   $\{^1\text{H}\}$  NMR for compound **6g** in  $\text{CDCl}_3$ .

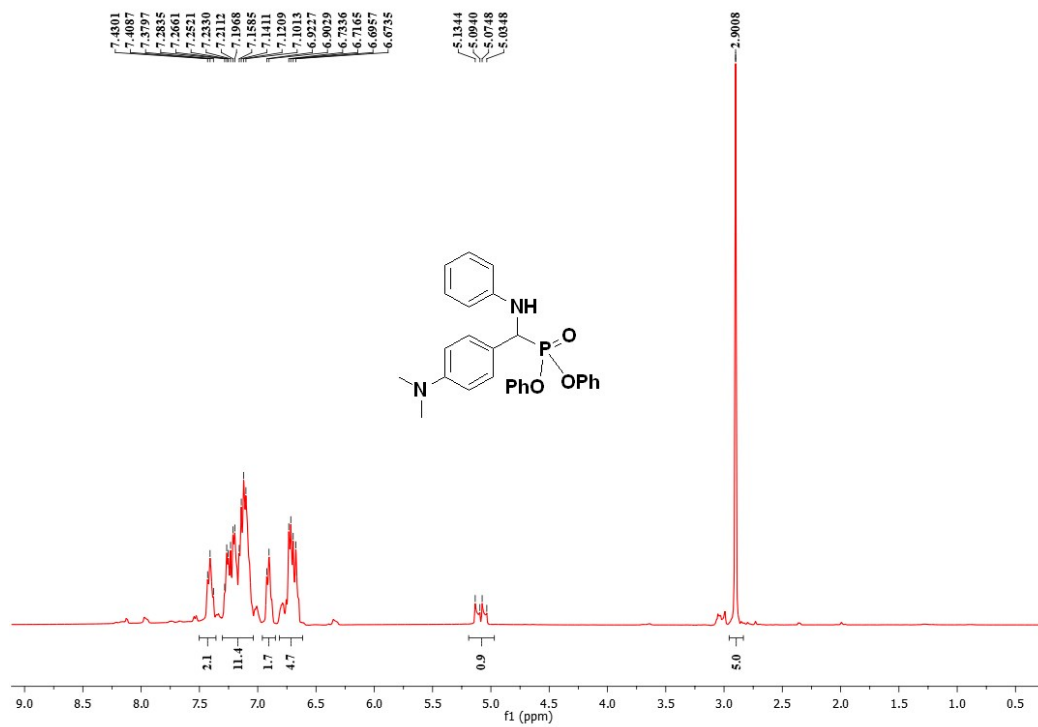

**Fig FS103.**  $^1\text{H}$  NMR for compound **6h** in  $\text{CDCl}_3$ .

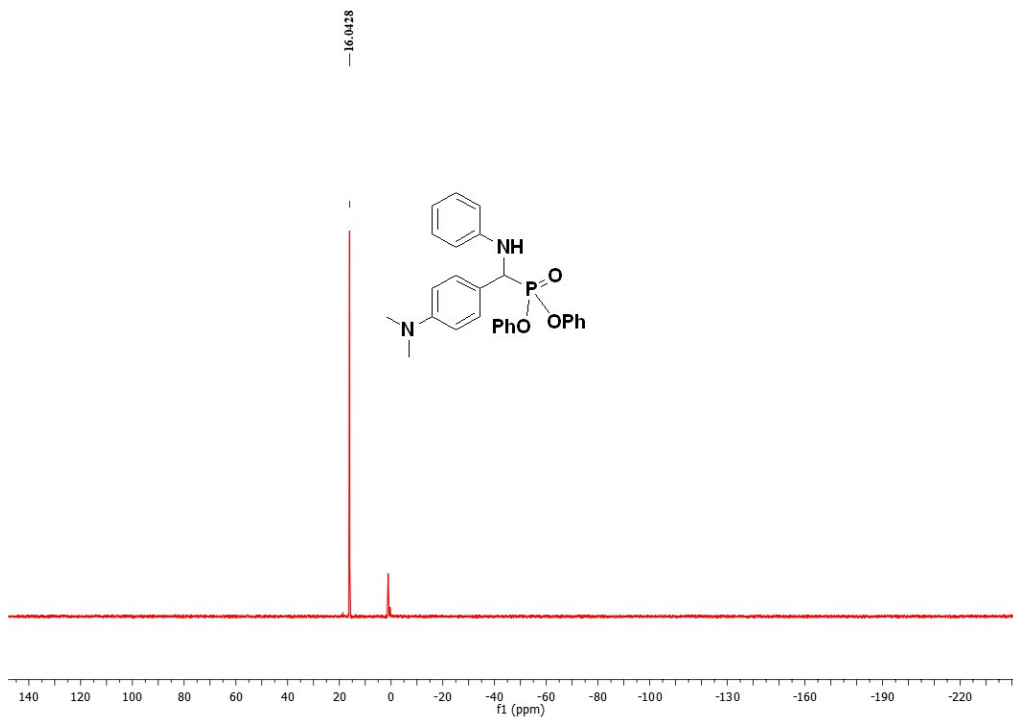

**Fig FS104.**  $^{31}\text{P}\{^1\text{H}\}$  NMR for compound **6h** in  $\text{CDCl}_3$ .

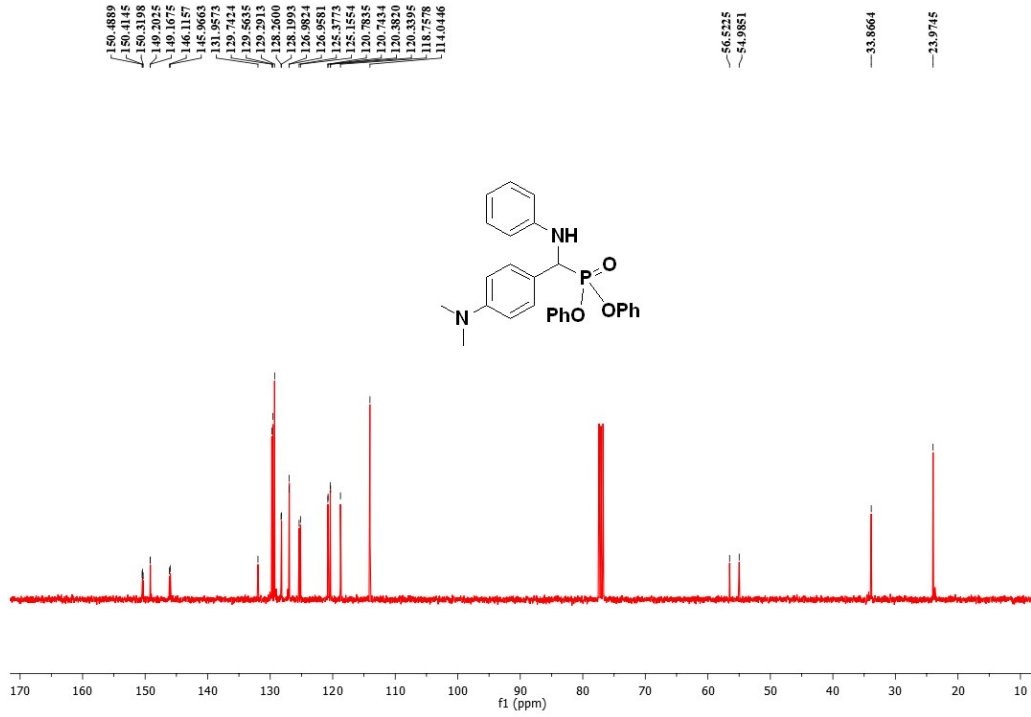

Fig FS105.  $^{13}\text{C}\{^1\text{H}\}$  NMR for compound **6h** in  $\text{CDCl}_3$ .

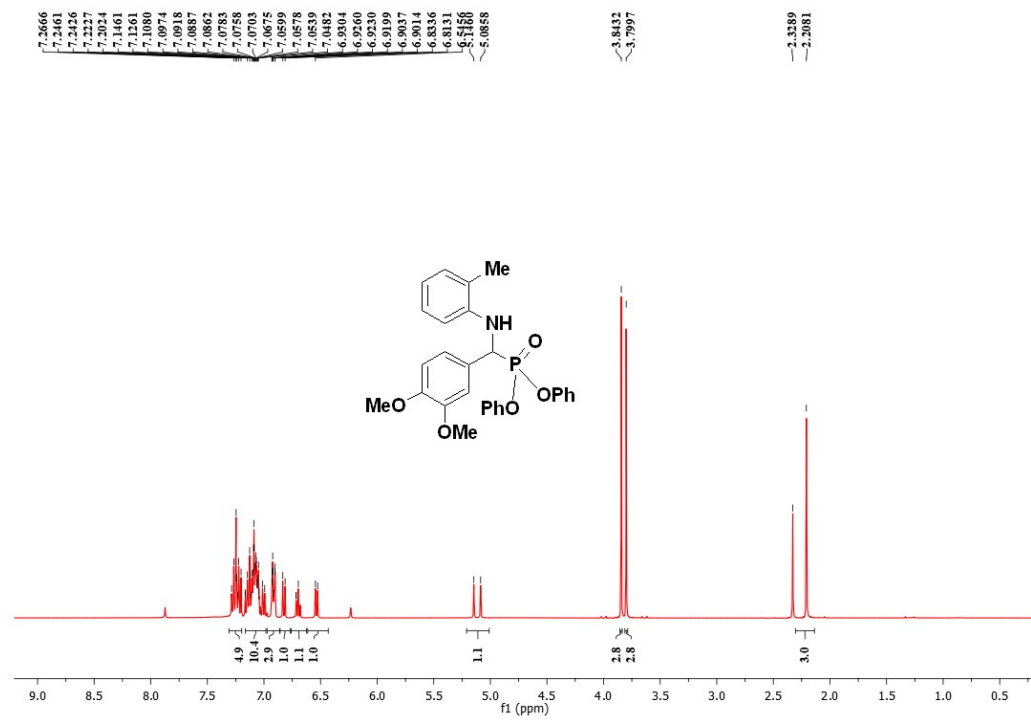

Fig FS106.  $^1\text{H}$  NMR for compound **6i** in  $\text{CDCl}_3$ .

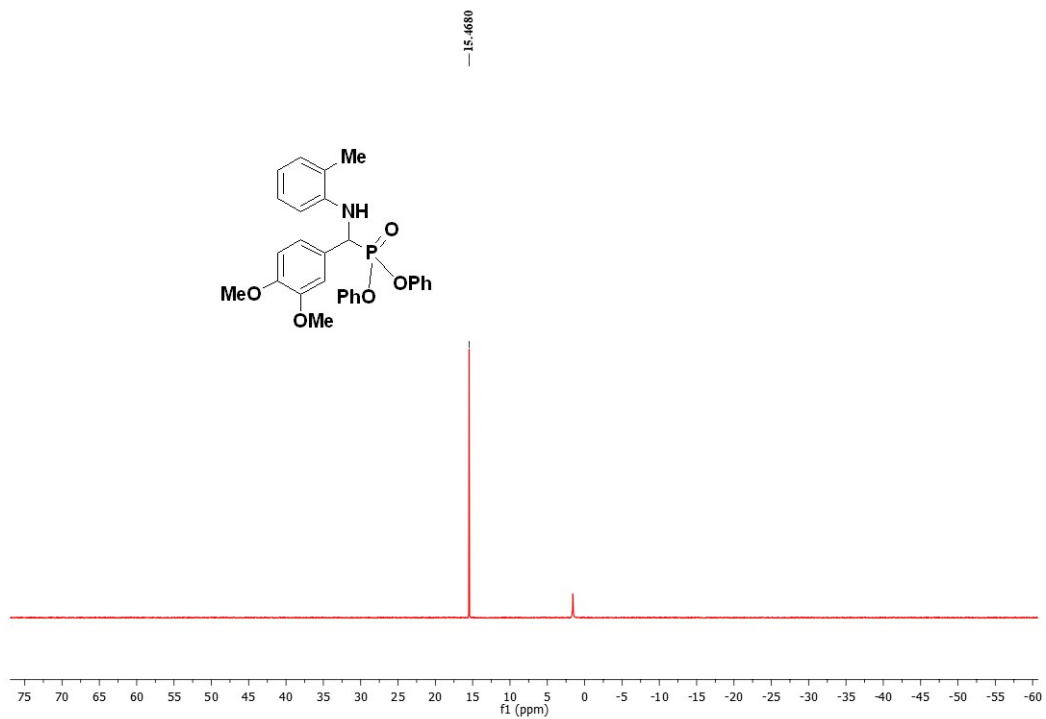

**Fig FS107.**  $^{31}\text{P}\{^1\text{H}\}$  NMR for compound **6i** in  $\text{CDCl}_3$ .

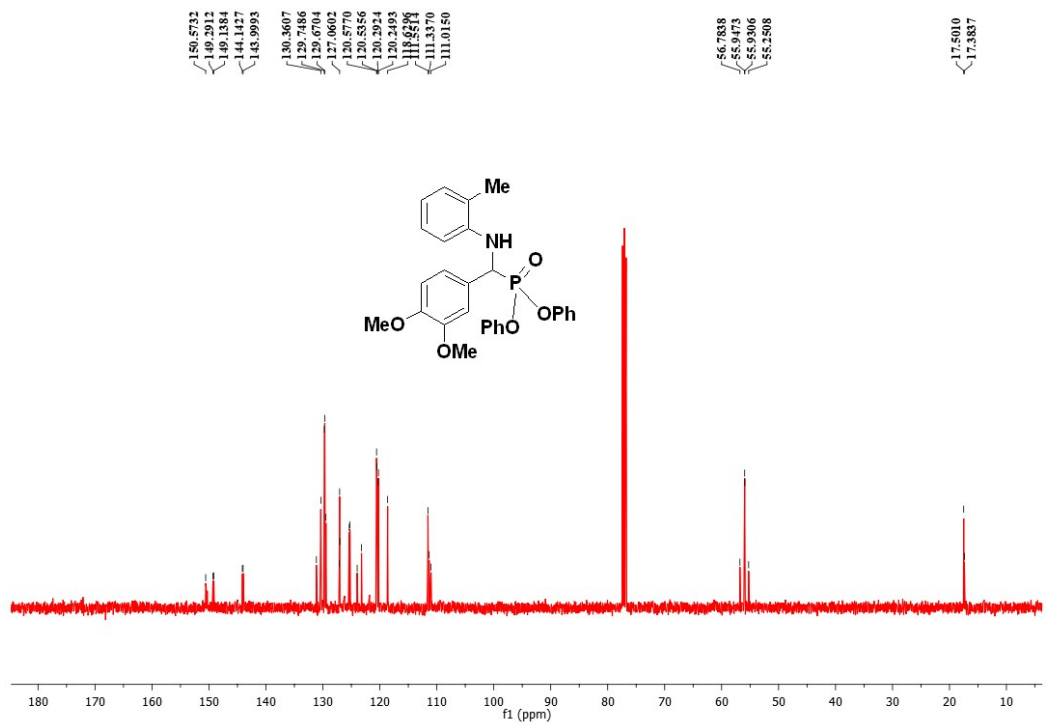

**Fig FS108.**  $^{13}\text{C}\{^1\text{H}\}$  NMR for compound **6i** in  $\text{CDCl}_3$ .



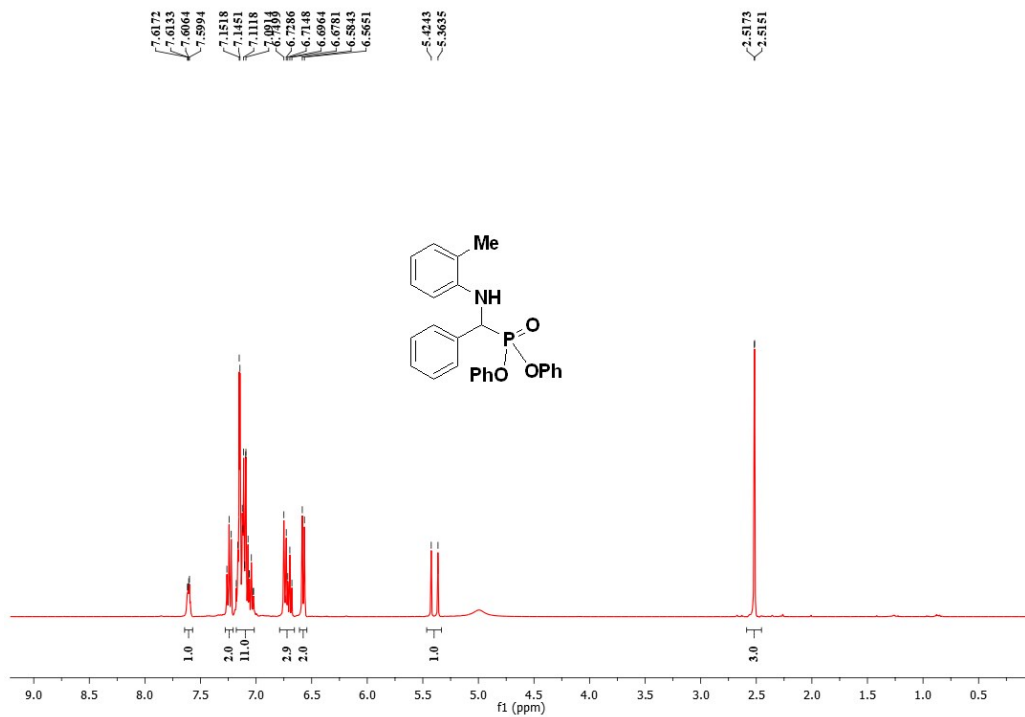

Fig FS109.  $^1\text{H}$  NMR for compound **6j** in  $\text{CDCl}_3$ .

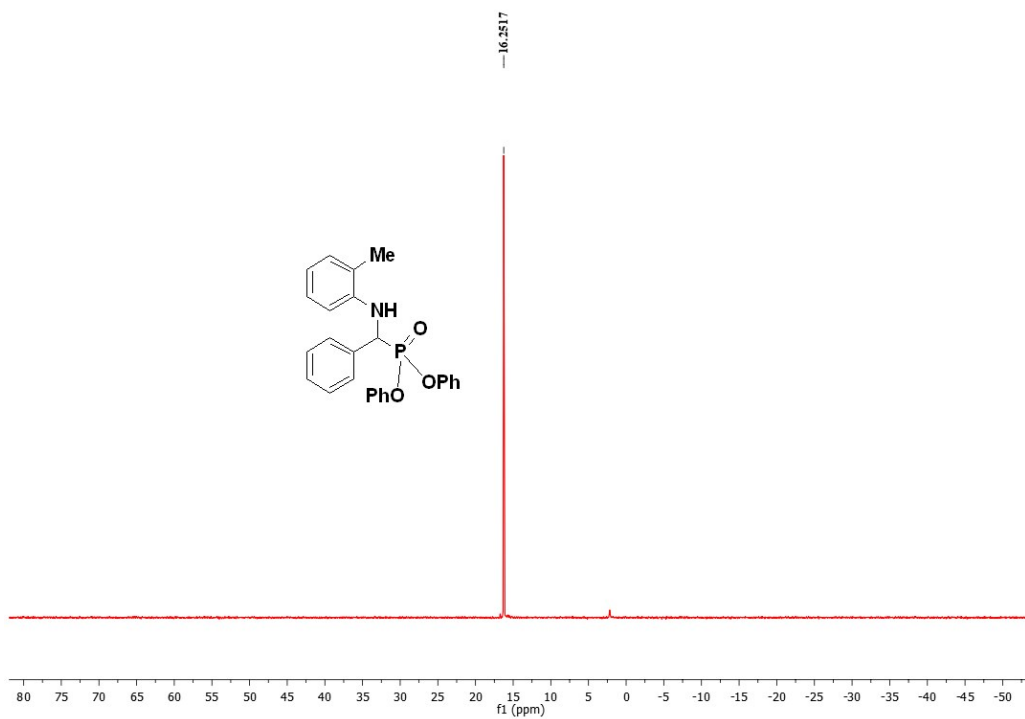

Fig FS110.  $^{31}\text{P}\{^1\text{H}\}$  NMR for compound **6j** in  $\text{CDCl}_3$ .

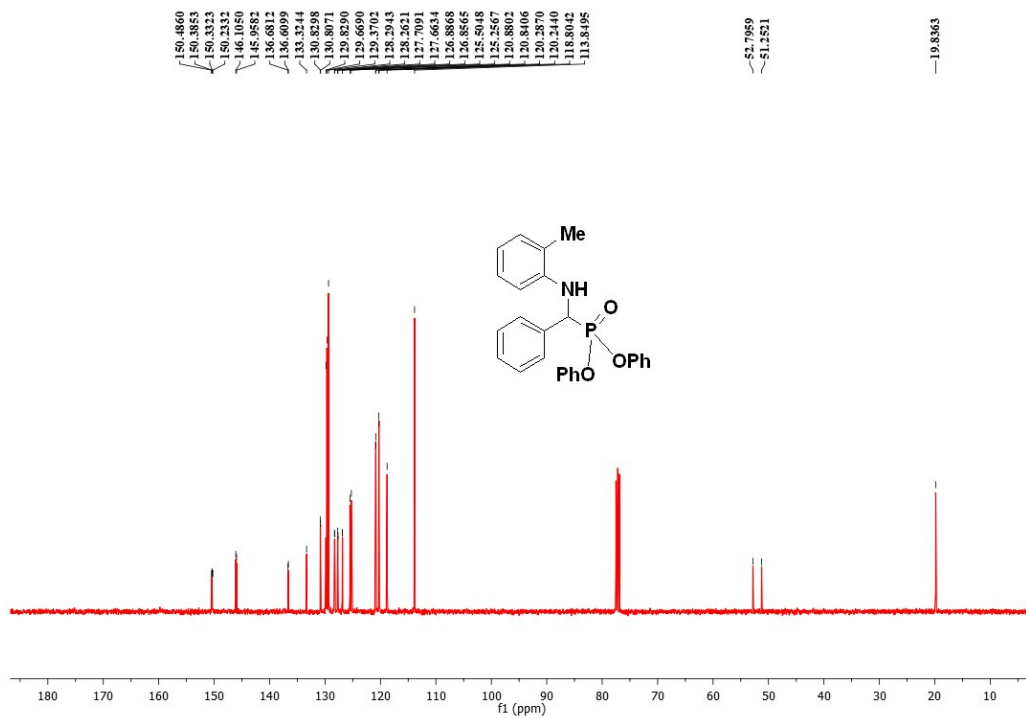

Fig FS111.  $^{13}\text{C}\{^1\text{H}\}$  NMR for compound **6j** in  $\text{CDCl}_3$ .

## 6. Computational Details

All calculations were performed using the ORCA quantum chemical program package<sup>[5]</sup>. Geometries were optimized with the GGA (generalized gradient approximation) density functional BP86<sup>[6-7]</sup> in conjunction with def2-SVP<sup>[8]</sup> basis sets. To accelerate the overall calculations, the RI<sup>[9-11]</sup> (resolution-of-identity) approximation was applied for the expensive integral calculations. Noncovalent interactions were accounted by using atom-pairwise dispersion corrections with Becke-Johnson (D3BJ) damping.<sup>[12]</sup> Subsequent numerical frequency calculations were undertaken for the optimized geometries to confirm that they correspond to stationary points featuring no imaginary frequencies. Gibbs free energies were calculated by single point calculations with BP86/def2-TZVP<sup>[8]</sup> method on the BP86/def2-SVP geometries.

## 7. (Ph)<sub>2</sub>P(=O)H → (Ph)<sub>2</sub>P–OH Tautomerization : A DFT Study

Phosphorylation of the imine complex of indium (**F**) with diphenylphosphine oxide ((Ph)<sub>2</sub>P(=O)H) was computed to be high in energy for the reaction to take place at room temperature (See MS, Fig. 12). So, we explored the other routes for the phosphorylation reaction. Montchamp and co-workers<sup>[13]</sup> have earlier reported a tautomerization of phosphine oxide (H<sub>2</sub>P(=O)H) to phosphinous acid (H<sub>2</sub>P–OH) involving a monomeric pathway. Thus, we studied the tautomerization of (Ph)<sub>2</sub>P(=O)H → (Ph)<sub>2</sub>P–OH, in which (Ph)<sub>2</sub>P(=O)H (**P(V)**) tautomerizes via a three membered transition state <sup>Monomer</sup>TS<sub>P(V)–P(III)</sub> to an unstable (Ph)<sub>2</sub>P–OH (**P(III)**) form ( $\Delta G_{298} = 7.7$  kcal mol<sup>-1</sup>, relative to **P(V)**, Fig. FS112(I)). The activation barrier for this tautomerization is still too high (51.2 kcal mol<sup>-1</sup>) thus we do not expect this tautomerization to occur at room temperature. The high barrier for **P(V)**→**P(III)** conversion is attributed to a strained three membered cyclic transition state.<sup>[14]</sup> In another study, a dimeric route for the tautomerization of phosphine oxide to phosphinous acid was reported.<sup>[15]</sup> Based on this study, we derived a dimeric pathway, in which firstly the two molecules of **P(V)** form a adduct <sup>Dimer</sup>**P(V)** (Fig. FS112(II)), which then undergoes via a six-membered cyclic transition state <sup>Dimer</sup>TS<sub>P(V)–P(III)</sub> to produce <sup>Dimer</sup>**P(III)**. The conversion via dimeric route is energetically affordable but endothermic in nature suggesting that **P(V)** dominates over **P(III)** in the solution. The phosphorylation of imine complex of indium is also studied with **P(III)** as this form is accessible in solution (See MS, Fig. 13).

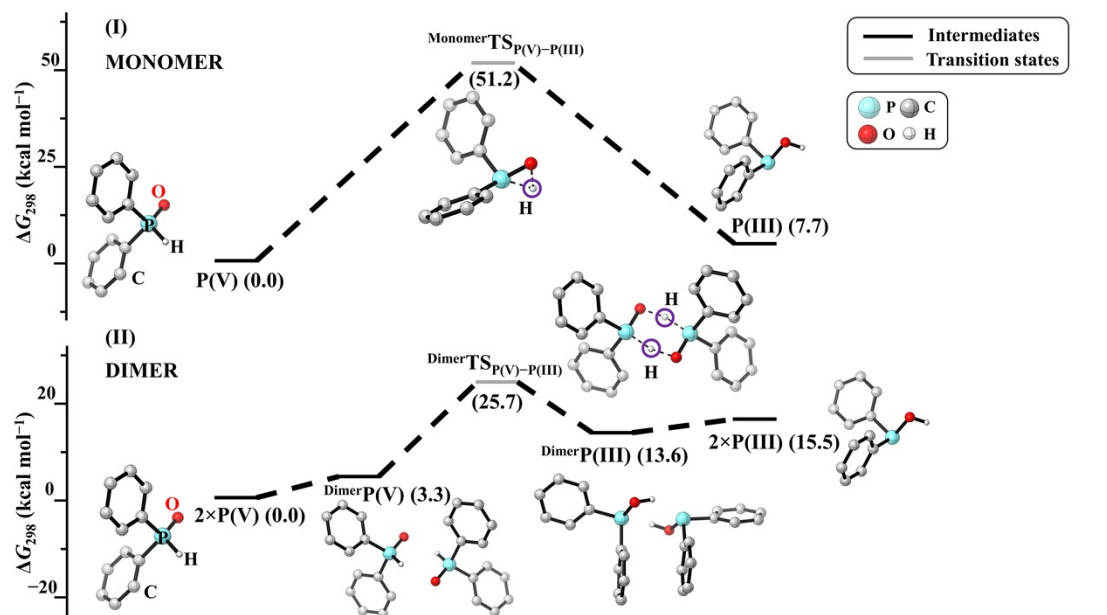

**Fig. FS112** Here, **P(V)** is diphenylphosphine oxide, and **P(III)** is diphenylphosphinous acid. DFT derived mechanistic pathway for the conversion of **P(V)**→**P(III)** is presented in **(I)** monomer and **(II)** dimer pathways. DFT method used in the study is BP86-D3/def2-TZVP // BP86-D3/def2-SVP. Gibbs free energies are in kcal mol<sup>-1</sup>.

## 8. Energy Table for Fig. 8

Total electronic energies and Gibbs free energies (298 K) of the molecules in Fig. 8. Employed DFT method: BP86-D3/def2-TZVP // BP86-D3/def2-SVP.

| Molecule               | $E_{\text{tot}}$ [au] | $G_{298}$ [au] | Imaginary Frequency |
|------------------------|-----------------------|----------------|---------------------|
| <b>A</b>               | -1553.266589          | -1552.804887   |                     |
| <b>TS<sub>AB</sub></b> | -1553.228079          | -1552.768911   | <i>i</i> 1368       |
| <b>B</b>               | -1553.256589          | -1552.793128   |                     |
| <b>TS<sub>BC</sub></b> | -1553.254272          | -1552.791489   | <i>i</i> 89         |
| <b>C</b>               | -1553.255218          | -1552.791923   |                     |
| <b>TS<sub>CD</sub></b> | -1553.253246          | -1552.791159   | <i>i</i> 38         |
| <b>D</b>               | -1553.258423          | -1552.795556   |                     |
| <b>TS<sub>DE</sub></b> | -1553.246379          | -1552.786491   | <i>i</i> 66         |

|                       |              |              |
|-----------------------|--------------|--------------|
| <b>E</b>              | -1553.267767 | -1552.808568 |
| <b>F</b>              | -1476.784786 | -1476.347438 |
| <b>H<sub>2</sub>O</b> | -76.464923   | -76.461977   |

### 9. Energy Table for Fig. 12

Total electronic energies and Gibbs free energies (298 K) of the molecules present in Fig. 12.  
Employed DFT method: BP86-D3/def2-TZVP // BP86-D3/def2-SVP.

| Molecule                      | E <sub>tot</sub> [au] | G <sub>298</sub> [au] | Imaginary Frequency |
|-------------------------------|-----------------------|-----------------------|---------------------|
| <b>F</b>                      | -1476.784786          | -1476.347438          |                     |
| <b>G'</b>                     | -2357.622829          | -2357.004622          |                     |
| <b>TS<sub>G'H'</sub></b>      | -2357.532884          | -2356.918405          | <i>i</i> 1564       |
| <b>H'</b>                     | -2357.658349          | -2357.035017          |                     |
| <b>(Ph)<sub>2</sub>P(=O)H</b> | -880.802463           | -880.650119           |                     |

### 10. Energy Table for Fig. 13

Total electronic energies and Gibbs free energies (298 K) of the molecules present in Fig. 13.  
Employed DFT method: BP86-D3/def2-TZVP // BP86-D3/def2-SVP.

| Molecule                    | E <sub>tot</sub> [au] | G <sub>298</sub> [au] | Imaginary Frequency |
|-----------------------------|-----------------------|-----------------------|---------------------|
| <b>F</b>                    | -1476.784786          | -1476.347438          |                     |
| <b>G</b>                    | -2357.616988          | -2356.996624          |                     |
| <b>TS<sub>GH</sub></b>      | -2357.615327          | -2356.994783          | <i>i</i> 103        |
| <b>H</b>                    | -2357.629563          | -2357.008440          |                     |
| <b>TS<sub>HI</sub></b>      | -2357.625984          | -2357.005790          | <i>i</i> 200        |
| <b>I</b>                    | -2357.658323          | -2357.034499          |                     |
| <b>(Ph)<sub>2</sub>P-OH</b> | -880.790757           | -880.637806           |                     |

### 11. Energy Table for Fig. FS112

Total electronic energies and Gibbs free energies (298 K) of the molecules in Fig. FS112.  
Employed DFT method: BP86-D3/def2-TZVP // BP86-D3/def2-SVP.

| Molecule                                        | $E_{\text{tot}}$ [au] | $G_{298}$ [au] | Imaginary Frequency |
|-------------------------------------------------|-----------------------|----------------|---------------------|
| <b>P(V)</b>                                     | -880.802463           | -880.650119    |                     |
| <b>Monomer</b> $\text{TS}_{\text{P(V)-P(III)}}$ | -880.717108           | -880.568584    | $i1387$             |
| <b>Dimer</b> $\text{P(V)}$                      | -1761.624399          | -1761.294981   |                     |
| <b>Dimer</b> $\text{TS}_{\text{P(V)-P(III)}}$   | -1761.583517          | -1761.259327   | $i1069$             |
| <b>Dimer</b> $\text{P(III)}$                    | -1761.609622          | -1761.278529   |                     |
| <b>P(III)</b>                                   | -880.790757           | -880.637806    |                     |

## 12. Cartesian Coordinates of the Optimized Structures

DFT optimization method: BP86-D3/def2-SVP

### 12.1 XYZ coordinates of the molecules present in Fig. 8

A

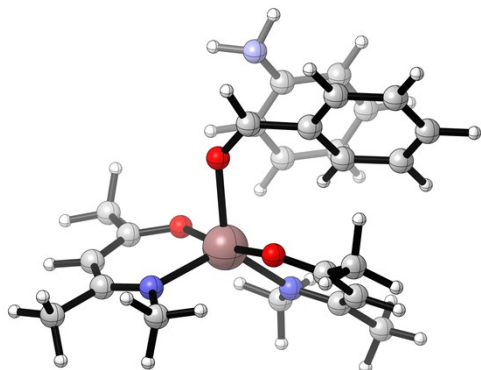

|    |              |              |              |
|----|--------------|--------------|--------------|
| In | 0.237758000  | -0.813788000 | 1.015710000  |
| O  | 2.184792000  | -0.981566000 | 0.115834000  |
| O  | -1.670699000 | -0.329270000 | 1.859426000  |
| N  | -0.604144000 | -1.902791000 | -0.662164000 |
| N  | 0.855809000  | -1.684988000 | 2.903069000  |
| C  | 2.431252000  | -1.450654000 | -1.070084000 |
| C  | 1.499230000  | -2.063490000 | -1.921721000 |
| H  | 1.899117000  | -2.415689000 | -2.880794000 |
| C  | 0.105368000  | -2.282643000 | -1.735347000 |
| C  | 3.852863000  | -1.256207000 | -1.529542000 |
| H  | 4.030082000  | -0.168569000 | -1.670609000 |
| H  | 4.073779000  | -1.779915000 | -2.476753000 |
| H  | 4.555962000  | -1.596518000 | -0.743060000 |
| C  | -0.624011000 | -2.987892000 | -2.856093000 |
| H  | -1.089234000 | -3.930141000 | -2.499776000 |
| H  | 0.058944000  | -3.230474000 | -3.688078000 |

|   |              |              |              |
|---|--------------|--------------|--------------|
| H | -1.448626000 | -2.356004000 | -3.247683000 |
| C | -1.200195000 | -1.076689000 | 4.103525000  |
| H | -1.655040000 | -1.124496000 | 5.101331000  |
| C | -1.992806000 | -0.483300000 | 3.114007000  |
| C | 0.104659000  | -1.648033000 | 4.010784000  |
| C | -3.364954000 | 0.039894000  | 3.459769000  |
| H | -3.416563000 | 1.126425000  | 3.236787000  |
| H | -3.632416000 | -0.122955000 | 4.519235000  |
| H | -4.121650000 | -0.451638000 | 2.814753000  |
| C | 0.665551000  | -2.255313000 | 5.276601000  |
| H | 0.893159000  | -3.332055000 | 5.133597000  |
| H | -0.042340000 | -2.157545000 | 6.117737000  |
| H | 1.619471000  | -1.765951000 | 5.562073000  |
| C | 1.801666000  | 2.006442000  | -0.908521000 |
| C | 1.035573000  | 1.216317000  | -1.796203000 |
| C | 2.917691000  | 2.728281000  | -1.400541000 |
| C | 1.404164000  | 1.122797000  | -3.143485000 |
| C | 3.287862000  | 2.622824000  | -2.744908000 |
| C | 2.529750000  | 1.816303000  | -3.617772000 |
| H | 0.141828000  | 0.683064000  | -1.440148000 |
| H | 3.505018000  | 3.354980000  | -0.710281000 |
| H | 0.800962000  | 0.510034000  | -3.828169000 |
| H | 4.167775000  | 3.165765000  | -3.120162000 |
| H | 2.818359000  | 1.735568000  | -4.676757000 |
| C | 1.465169000  | 2.131926000  | 0.506837000  |
| O | 0.750204000  | 1.341176000  | 1.177389000  |
| H | 1.998638000  | 2.932393000  | 1.068935000  |
| C | -1.210655000 | 3.241100000  | -2.113918000 |
| C | -1.176005000 | 3.110342000  | -0.706554000 |
| C | -2.007720000 | 2.379418000  | -2.880905000 |
| H | -2.032344000 | 2.500193000  | -3.974680000 |
| C | -1.947898000 | 2.101822000  | -0.085842000 |
| C | -2.764418000 | 1.368066000  | -2.264318000 |
| H | -1.921822000 | 1.978422000  | 1.005463000  |
| H | -3.394443000 | 0.699777000  | -2.870484000 |
| C | -2.730273000 | 1.239412000  | -0.864073000 |
| H | -3.323600000 | 0.465885000  | -0.356406000 |
| H | -0.602899000 | 4.016127000  | -2.605927000 |
| N | -0.290374000 | 3.875285000  | 0.059588000  |
| H | -0.566558000 | 4.024388000  | 1.034273000  |
| H | 0.051868000  | 4.733772000  | -0.381294000 |
| C | 2.180555000  | -2.310972000 | 2.940911000  |
| H | 2.837365000  | -1.834402000 | 3.698730000  |
| H | 2.114414000  | -3.393815000 | 3.178499000  |
| H | 2.664376000  | -2.195303000 | 1.955088000  |
| C | -2.030716000 | -2.225583000 | -0.587669000 |
| H | -2.597156000 | -1.785054000 | -1.434145000 |
| H | -2.199004000 | -3.323311000 | -0.597869000 |
| H | -2.444955000 | -1.816805000 | 0.350112000  |

**TS<sub>AB</sub>**

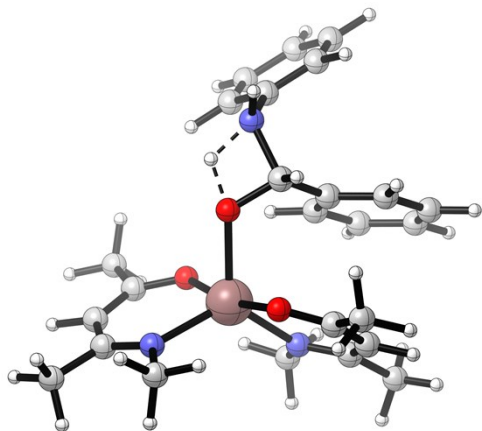

|    |              |              |              |
|----|--------------|--------------|--------------|
| In | 0.698640000  | -0.932620000 | 1.086743000  |
| O  | 2.786379000  | -0.745164000 | 0.587644000  |
| O  | -1.421138000 | -0.731269000 | 1.449710000  |
| N  | 0.424764000  | -2.180727000 | -0.669174000 |
| N  | 0.981477000  | -1.710329000 | 3.081725000  |
| C  | 3.317412000  | -1.097861000 | -0.545908000 |
| C  | 2.673905000  | -1.797600000 | -1.575184000 |
| H  | 3.285379000  | -1.997620000 | -2.463955000 |
| C  | 1.349501000  | -2.322135000 | -1.626986000 |
| C  | 4.764478000  | -0.697511000 | -0.703311000 |
| H  | 4.868188000  | 0.395583000  | -0.543589000 |
| H  | 5.179391000  | -0.966589000 | -1.691524000 |
| H  | 5.370642000  | -1.188734000 | 0.085801000  |
| C  | 0.978711000  | -3.097723000 | -2.869575000 |
| H  | 0.680977000  | -4.136975000 | -2.619364000 |
| H  | 1.820768000  | -3.139785000 | -3.582253000 |
| H  | 0.111135000  | -2.626740000 | -3.375528000 |
| C  | -1.380827000 | -1.513410000 | 3.731127000  |
| H  | -2.047013000 | -1.685627000 | 4.586175000  |
| C  | -2.000719000 | -0.994941000 | 2.584956000  |
| C  | -0.014405000 | -1.854202000 | 3.964808000  |
| C  | -3.481847000 | -0.701785000 | 2.603714000  |
| H  | -3.648463000 | 0.367125000  | 2.356647000  |
| H  | -3.953746000 | -0.925304000 | 3.577481000  |
| H  | -3.986840000 | -1.292265000 | 1.811809000  |
| C  | 0.317488000  | -2.413340000 | 5.329589000  |
| H  | 0.788397000  | -3.414714000 | 5.245041000  |
| H  | -0.586292000 | -2.505962000 | 5.955971000  |
| H  | 1.046812000  | -1.764086000 | 5.857664000  |
| C  | 0.676185000  | 1.351194000  | -1.404811000 |
| C  | -0.606056000 | 0.772728000  | -1.526657000 |
| C  | 1.527524000  | 1.398394000  | -2.524658000 |
| C  | -1.037473000 | 0.282602000  | -2.766478000 |
| C  | 1.100324000  | 0.890274000  | -3.760659000 |
| C  | -0.186742000 | 0.341345000  | -3.884645000 |
| H  | -1.267519000 | 0.703690000  | -0.650599000 |
| H  | 2.535093000  | 1.831344000  | -2.425297000 |
| H  | -2.047071000 | -0.143426000 | -2.861802000 |
| H  | 1.773242000  | 0.923191000  | -4.630341000 |
| H  | -0.528288000 | -0.042609000 | -4.857838000 |
| C  | 1.127399000  | 1.946969000  | -0.102806000 |
| O  | 0.728953000  | 1.246421000  | 1.067995000  |
| H  | 2.217612000  | 2.165416000  | -0.119042000 |
| C  | -0.628182000 | 4.332827000  | -1.657760000 |
| C  | -0.778277000 | 3.649366000  | -0.439614000 |
| C  | -1.765860000 | 4.642230000  | -2.416796000 |
| H  | -1.654431000 | 5.174060000  | -3.372951000 |
| C  | -2.048866000 | 3.278882000  | 0.027948000  |



|   |              |              |              |
|---|--------------|--------------|--------------|
| C | -3.041962000 | 4.269764000  | -1.959601000 |
| H | -2.142283000 | 2.742671000  | 0.983425000  |
| H | -3.931766000 | 4.514689000  | -2.557863000 |
| C | -3.182764000 | 3.592731000  | -0.737218000 |
| H | -4.181439000 | 3.308274000  | -0.374635000 |
| H | 0.374224000  | 4.607855000  | -2.018983000 |
| N | 0.387235000  | 3.244703000  | 0.320629000  |
| H | 0.223509000  | 2.381278000  | 1.282469000  |
| H | 1.045794000  | 4.023684000  | 0.470769000  |
| C | 2.351453000  | -2.081883000 | 3.446183000  |
| H | 2.693555000  | -1.547217000 | 4.356605000  |
| H | 2.444316000  | -3.172584000 | 3.636202000  |
| H | 3.031757000  | -1.812405000 | 2.617984000  |
| C | -0.897810000 | -2.778377000 | -0.847020000 |
| H | -1.387774000 | -2.412721000 | -1.774205000 |
| H | -0.842715000 | -3.886273000 | -0.901829000 |
| H | -1.542450000 | -2.496488000 | 0.003552000  |

## B

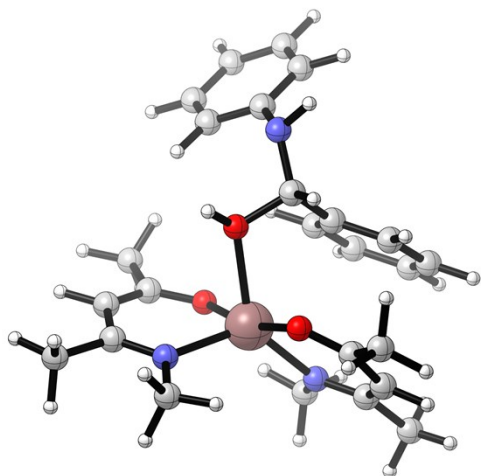

|    |              |              |              |
|----|--------------|--------------|--------------|
| In | 0.560486000  | -1.029228000 | 0.658628000  |
| O  | 2.652542000  | -0.673512000 | 0.384289000  |
| O  | -1.564185000 | -0.901502000 | 0.851958000  |
| N  | 0.538731000  | -2.367977000 | -1.029388000 |
| N  | 0.714222000  | -1.569528000 | 2.746835000  |
| C  | 3.368075000  | -1.178866000 | -0.582330000 |
| C  | 2.913174000  | -2.054750000 | -1.575030000 |
| H  | 3.668658000  | -2.366291000 | -2.307169000 |
| C  | 1.611685000  | -2.599917000 | -1.792984000 |
| C  | 4.808933000  | -0.732544000 | -0.576365000 |
| H  | 4.855865000  | 0.374140000  | -0.653144000 |
| H  | 5.400870000  | -1.178860000 | -1.395402000 |
| H  | 5.274791000  | -0.998230000 | 0.395196000  |
| C  | 1.449613000  | -3.509867000 | -2.987001000 |
| H  | 1.090458000  | -4.513418000 | -2.678815000 |
| H  | 2.400884000  | -3.631783000 | -3.532738000 |
| H  | 0.689390000  | -3.102637000 | -3.685773000 |
| C  | -1.557898000 | -0.805383000 | 3.262354000  |
| H  | -2.217326000 | -0.585389000 | 4.111593000  |
| C  | -2.146004000 | -0.670739000 | 1.995100000  |
| C  | -0.268082000 | -1.305724000 | 3.617754000  |
| C  | -3.590960000 | -0.258886000 | 1.872820000  |
| H  | -3.659087000 | 0.648716000  | 1.238281000  |
| H  | -4.067958000 | -0.064731000 | 2.849735000  |
| H  | -4.155763000 | -1.055325000 | 1.345164000  |
| C  | -0.017203000 | -1.565488000 | 5.084820000  |

|   |              |              |              |
|---|--------------|--------------|--------------|
| H | 0.198630000  | -2.640096000 | 5.258846000  |
| H | -0.890223000 | -1.284946000 | 5.699112000  |
| H | 0.867633000  | -1.004289000 | 5.449208000  |
| C | 0.480253000  | 1.249115000  | -1.355971000 |
| C | -0.875679000 | 0.886145000  | -1.549194000 |
| C | 1.426544000  | 0.925150000  | -2.352107000 |
| C | -1.261763000 | 0.211051000  | -2.717265000 |
| C | 1.035676000  | 0.248496000  | -3.516064000 |
| C | -0.311044000 | -0.107356000 | -3.701501000 |
| H | -1.624490000 | 1.123048000  | -0.783835000 |
| H | 2.481901000  | 1.204216000  | -2.210320000 |
| H | -2.317664000 | -0.064262000 | -2.857099000 |
| H | 1.785922000  | -0.002185000 | -4.280469000 |
| H | -0.622370000 | -0.626574000 | -4.620794000 |
| C | 0.941778000  | 2.034258000  | -0.137767000 |
| O | 0.524018000  | 1.246451000  | 1.027381000  |
| H | 2.050540000  | 2.082186000  | -0.154733000 |
| C | -1.327717000 | 4.459721000  | -1.279164000 |
| C | -0.917521000 | 3.680681000  | -0.178810000 |
| C | -2.686010000 | 4.757026000  | -1.470132000 |
| H | -2.992568000 | 5.370972000  | -2.330501000 |
| C | -1.886829000 | 3.204666000  | 0.731451000  |
| C | -3.650984000 | 4.263106000  | -0.577451000 |
| H | -1.566973000 | 2.618781000  | 1.603764000  |
| H | -4.715451000 | 4.495242000  | -0.729141000 |
| C | -3.244773000 | 3.486132000  | 0.521895000  |
| H | -3.992187000 | 3.119704000  | 1.241987000  |
| H | -0.574834000 | 4.825703000  | -1.994460000 |
| N | 0.461498000  | 3.381699000  | 0.025666000  |
| H | 0.839586000  | 1.690146000  | 1.843268000  |
| H | 1.086126000  | 4.053631000  | -0.428018000 |
| C | 1.981198000  | -2.141718000 | 3.206302000  |
| H | 2.479815000  | -1.497358000 | 3.961424000  |
| H | 1.836936000  | -3.147017000 | 3.656665000  |
| H | 2.670700000  | -2.239752000 | 2.347935000  |
| C | -0.748990000 | -2.984557000 | -1.354291000 |
| H | -1.057012000 | -2.756706000 | -2.395130000 |
| H | -0.710556000 | -4.088884000 | -1.235891000 |
| H | -1.524473000 | -2.582375000 | -0.678742000 |

### TS<sub>BC</sub>

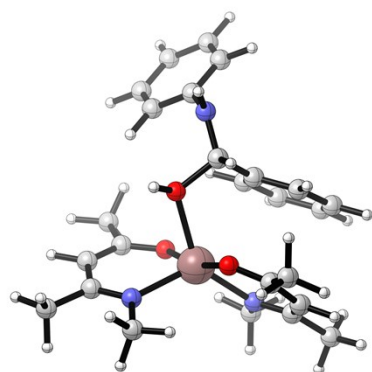

|    |              |              |              |
|----|--------------|--------------|--------------|
| In | 0.561983000  | -0.987002000 | 0.640489000  |
| O  | 2.662163000  | -0.637370000 | 0.370963000  |
| O  | -1.568124000 | -0.882425000 | 0.833767000  |
| N  | 0.558908000  | -2.365322000 | -1.017077000 |
| N  | 0.710296000  | -1.579783000 | 2.718783000  |
| C  | 3.384060000  | -1.162271000 | -0.579454000 |
| C  | 2.936476000  | -2.061361000 | -1.554886000 |
| H  | 3.696890000  | -2.388383000 | -2.275050000 |
| C  | 1.637399000  | -2.614418000 | -1.767040000 |

|   |              |              |              |
|---|--------------|--------------|--------------|
| C | 4.824689000  | -0.713631000 | -0.577154000 |
| H | 4.870586000  | 0.390437000  | -0.686454000 |
| H | 5.422540000  | -1.181912000 | -1.379441000 |
| H | 5.285034000  | -0.950151000 | 0.404569000  |
| C | 1.485354000  | -3.554557000 | -2.939005000 |
| H | 1.128804000  | -4.551644000 | -2.607746000 |
| H | 2.439814000  | -3.686126000 | -3.476859000 |
| H | 0.726734000  | -3.168598000 | -3.651354000 |
| C | -1.562965000 | -0.829080000 | 3.245803000  |
| H | -2.223241000 | -0.624384000 | 4.098287000  |
| C | -2.148594000 | -0.668836000 | 1.980079000  |
| C | -0.274743000 | -1.338748000 | 3.592979000  |
| C | -3.591011000 | -0.243661000 | 1.865174000  |
| H | -3.649075000 | 0.685089000  | 1.260537000  |
| H | -4.071314000 | -0.077094000 | 2.845569000  |
| H | -4.159000000 | -1.017527000 | 1.308467000  |
| C | -0.029618000 | -1.637112000 | 5.053892000  |
| H | 0.177208000  | -2.717582000 | 5.201099000  |
| H | -0.902437000 | -1.366115000 | 5.672869000  |
| H | 0.858364000  | -1.092253000 | 5.434845000  |
| C | 0.472838000  | 1.277131000  | -1.386824000 |
| C | -0.880474000 | 0.897023000  | -1.556120000 |
| C | 1.416354000  | 0.917531000  | -2.372801000 |
| C | -1.270024000 | 0.175257000  | -2.695317000 |
| C | 1.021616000  | 0.196137000  | -3.508342000 |
| C | -0.324185000 | -0.172686000 | -3.673623000 |
| H | -1.626517000 | 1.157677000  | -0.795763000 |
| H | 2.470612000  | 1.207568000  | -2.249113000 |
| H | -2.324700000 | -0.113176000 | -2.815590000 |
| H | 1.769471000  | -0.078206000 | -4.266919000 |
| H | -0.637781000 | -0.727139000 | -4.571301000 |
| C | 0.937456000  | 2.100646000  | -0.199890000 |
| O | 0.527089000  | 1.255042000  | 1.020241000  |
| H | 2.043888000  | 2.129521000  | -0.181938000 |
| C | -1.383549000 | 4.492523000  | -1.348619000 |
| C | -0.946198000 | 3.729160000  | -0.249833000 |
| C | -2.744804000 | 4.804420000  | -1.492423000 |
| H | -3.080503000 | 5.402513000  | -2.353039000 |
| C | -1.881737000 | 3.279591000  | 0.706801000  |
| C | -3.677232000 | 4.345395000  | -0.547119000 |
| H | -1.530658000 | 2.686052000  | 1.562462000  |
| H | -4.743896000 | 4.589814000  | -0.661967000 |
| C | -3.243392000 | 3.582338000  | 0.551343000  |
| H | -3.969593000 | 3.236445000  | 1.302678000  |
| H | -0.645327000 | 4.825842000  | -2.092502000 |
| N | 0.443485000  | 3.406407000  | -0.128614000 |
| H | 0.996893000  | 1.584081000  | 1.814568000  |
| H | 1.066326000  | 4.126322000  | 0.240705000  |
| C | 1.971640000  | -2.173215000 | 3.165087000  |
| H | 2.473343000  | -1.555407000 | 3.940215000  |
| H | 1.820004000  | -3.190429000 | 3.585471000  |
| H | 2.662458000  | -2.251769000 | 2.305613000  |
| C | -0.723740000 | -2.995987000 | -1.333765000 |
| H | -1.027302000 | -2.794630000 | -2.381420000 |
| H | -0.680764000 | -4.097031000 | -1.188869000 |
| H | -1.504561000 | -2.582337000 | -0.671341000 |

C

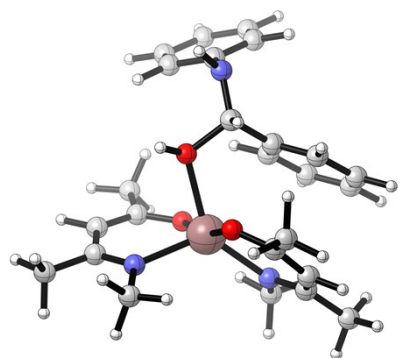

|    |              |              |              |
|----|--------------|--------------|--------------|
| In | 0.500537000  | -0.967647000 | 0.634505000  |
| O  | 2.604208000  | -0.632854000 | 0.375647000  |
| O  | -1.625040000 | -0.819152000 | 0.838024000  |
| N  | 0.488822000  | -2.326410000 | -1.036374000 |
| N  | 0.641810000  | -1.600634000 | 2.700257000  |
| C  | 3.323482000  | -1.154075000 | -0.578891000 |
| C  | 2.870213000  | -2.038879000 | -1.564834000 |
| H  | 3.629174000  | -2.364465000 | -2.287144000 |
| C  | 1.566556000  | -2.576562000 | -1.787308000 |
| C  | 4.767449000  | -0.716793000 | -0.569769000 |
| H  | 4.821918000  | 0.387093000  | -0.677346000 |
| H  | 5.364997000  | -1.187966000 | -1.370550000 |
| H  | 5.221694000  | -0.958368000 | 0.413461000  |
| C  | 1.407861000  | -3.501307000 | -2.970465000 |
| H  | 1.040117000  | -4.498350000 | -2.651465000 |
| H  | 2.362412000  | -3.636562000 | -3.507193000 |
| H  | 0.655574000  | -3.099240000 | -3.680676000 |
| C  | -1.598731000 | -0.775202000 | 3.250318000  |
| H  | -2.244053000 | -0.549892000 | 4.109051000  |
| C  | -2.185343000 | -0.578773000 | 1.989776000  |
| C  | -0.329746000 | -1.338756000 | 3.583720000  |
| C  | -3.598477000 | -0.064018000 | 1.887199000  |
| H  | -3.584300000 | 0.919721000  | 1.371808000  |
| H  | -4.089554000 | 0.047035000  | 2.870131000  |
| H  | -4.195847000 | -0.747709000 | 1.250393000  |
| C  | -0.088957000 | -1.670808000 | 5.037981000  |
| H  | 0.069381000  | -2.762029000 | 5.165936000  |
| H  | -0.945178000 | -1.371517000 | 5.667089000  |
| H  | 0.824926000  | -1.172974000 | 5.421816000  |
| C  | 0.505699000  | 1.340983000  | -1.362104000 |
| C  | -0.840432000 | 0.935568000  | -1.531514000 |
| C  | 1.453657000  | 1.017493000  | -2.354573000 |
| C  | -1.220702000 | 0.226925000  | -2.681758000 |
| C  | 1.067939000  | 0.308213000  | -3.501320000 |
| C  | -0.271274000 | -0.082978000 | -3.669266000 |
| H  | -1.588928000 | 1.166396000  | -0.763223000 |
| H  | 2.502179000  | 1.325518000  | -2.227309000 |
| H  | -2.269987000 | -0.079210000 | -2.803747000 |
| H  | 1.817979000  | 0.060111000  | -4.266670000 |
| H  | -0.576749000 | -0.626217000 | -4.576521000 |
| C  | 0.945996000  | 2.135746000  | -0.149598000 |
| O  | 0.490267000  | 1.276580000  | 1.043664000  |
| H  | 2.051274000  | 2.155949000  | -0.088945000 |
| C  | -1.477160000 | 4.063056000  | -1.466300000 |
| C  | -0.962763000 | 3.692513000  | -0.209977000 |
| C  | -2.858037000 | 4.250175000  | -1.632200000 |
| H  | -3.256321000 | 4.538848000  | -2.616311000 |
| C  | -1.834720000 | 3.527016000  | 0.884412000  |
| C  | -3.728600000 | 4.080875000  | -0.542141000 |
| H  | -1.428551000 | 3.228299000  | 1.862057000  |
| H  | -4.810187000 | 4.236993000  | -0.671536000 |
| C  | -3.214949000 | 3.727119000  | 0.717895000  |

|   |              |              |              |
|---|--------------|--------------|--------------|
| H | -3.892102000 | 3.610055000  | 1.577487000  |
| H | -0.780390000 | 4.191407000  | -2.307058000 |
| N | 0.448813000  | 3.449684000  | -0.081218000 |
| H | 0.981926000  | 1.553182000  | 1.844067000  |
| H | 0.927702000  | 4.048607000  | 0.598140000  |
| C | 1.880803000  | -2.252395000 | 3.125960000  |
| H | 2.410841000  | -1.673363000 | 3.911994000  |
| H | 1.691105000  | -3.272352000 | 3.523501000  |
| H | 2.564005000  | -2.338929000 | 2.261095000  |
| C | -0.799694000 | -2.941720000 | -1.358928000 |
| H | -1.098456000 | -2.737336000 | -2.407260000 |
| H | -0.769431000 | -4.043344000 | -1.214895000 |
| H | -1.578380000 | -2.521454000 | -0.697780000 |

### TS<sub>CD</sub>

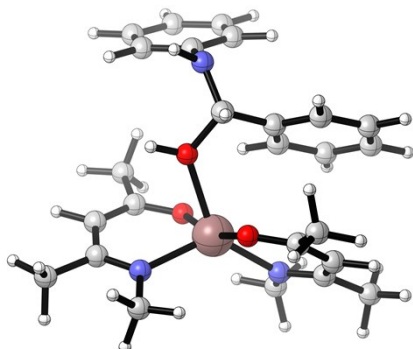

|    |              |              |              |
|----|--------------|--------------|--------------|
| In | 0.462452000  | -1.166077000 | 0.672883000  |
| O  | 2.542749000  | -0.895355000 | 0.307219000  |
| O  | -1.658210000 | -0.890573000 | 0.847636000  |
| N  | 0.323147000  | -2.575082000 | -0.946446000 |
| N  | 0.579726000  | -1.603650000 | 2.780466000  |
| C  | 3.126778000  | -1.265667000 | -0.799128000 |
| C  | 2.569026000  | -2.073843000 | -1.798134000 |
| H  | 3.221698000  | -2.270624000 | -2.657804000 |
| C  | 1.287171000  | -2.693756000 | -1.868130000 |
| C  | 4.533674000  | -0.747505000 | -0.952168000 |
| H  | 4.518607000  | 0.362545000  | -0.944474000 |
| H  | 5.021131000  | -1.098428000 | -1.879315000 |
| H  | 5.141924000  | -1.062053000 | -0.078910000 |
| C  | 1.007801000  | -3.540679000 | -3.086321000 |
| H  | 0.739985000  | -4.579191000 | -2.802038000 |
| H  | 1.882259000  | -3.578148000 | -3.759151000 |
| H  | 0.144412000  | -3.133016000 | -3.652717000 |
| C  | -1.590143000 | -0.557067000 | 3.235429000  |
| H  | -2.207941000 | -0.189706000 | 4.064899000  |
| C  | -2.182776000 | -0.467342000 | 1.963017000  |
| C  | -0.361757000 | -1.172733000 | 3.629386000  |
| C  | -3.544832000 | 0.154434000  | 1.806171000  |
| H  | -3.437224000 | 1.112045000  | 1.252208000  |
| H  | -4.042020000 | 0.354413000  | 2.771894000  |
| H  | -4.183759000 | -0.505243000 | 1.185432000  |
| C  | -0.126568000 | -1.346347000 | 5.111639000  |
| H  | -0.028806000 | -2.421831000 | 5.367793000  |
| H  | -0.957082000 | -0.925554000 | 5.704357000  |
| H  | 0.818356000  | -0.860614000 | 5.431499000  |
| C  | 0.836839000  | 1.414591000  | -1.360490000 |
| C  | -0.319065000 | 0.672101000  | -1.683710000 |
| C  | 1.847290000  | 1.576357000  | -2.327946000 |
| C  | -0.449932000 | 0.094988000  | -2.958752000 |
| C  | 1.708866000  | 1.005556000  | -3.601381000 |
| C  | 0.560129000  | 0.259218000  | -3.918728000 |
| H  | -1.136761000 | 0.564672000  | -0.953966000 |
| H  | 2.746716000  | 2.161394000  | -2.081789000 |

|   |              |              |              |
|---|--------------|--------------|--------------|
| H | -1.360172000 | -0.472956000 | -3.203150000 |
| H | 2.504335000  | 1.140134000  | -4.349711000 |
| H | 0.452681000  | -0.188141000 | -4.918016000 |
| C | 0.998728000  | 2.085156000  | -0.008676000 |
| O | 0.460633000  | 1.098835000  | 0.978587000  |
| H | 2.077287000  | 2.213100000  | 0.214722000  |
| C | -1.616899000 | 3.475227000  | -1.323611000 |
| C | -1.042569000 | 3.491516000  | -0.036119000 |
| C | -3.006631000 | 3.592169000  | -1.473123000 |
| H | -3.445966000 | 3.577863000  | -2.482088000 |
| C | -1.872625000 | 3.665231000  | 1.089927000  |
| C | -3.833133000 | 3.761179000  | -0.348916000 |
| H | -1.425432000 | 3.696197000  | 2.096702000  |
| H | -4.920560000 | 3.872793000  | -0.473765000 |
| C | -3.259993000 | 3.812994000  | 0.932801000  |
| H | -3.895434000 | 3.967482000  | 1.817720000  |
| H | -0.964734000 | 3.388884000  | -2.202786000 |
| N | 0.373244000  | 3.356154000  | 0.121763000  |
| H | 0.403020000  | 1.489078000  | 1.873050000  |
| H | 0.747738000  | 3.906792000  | 0.900492000  |
| C | 1.791197000  | -2.262208000 | 3.271332000  |
| H | 2.342022000  | -1.632875000 | 4.002305000  |
| H | 1.560133000  | -3.231818000 | 3.761970000  |
| H | 2.472527000  | -2.456664000 | 2.422371000  |
| C | -0.968474000 | -3.236209000 | -1.135693000 |
| H | -1.460889000 | -2.909349000 | -2.076832000 |
| H | -0.861369000 | -4.341034000 | -1.170214000 |
| H | -1.642529000 | -2.971762000 | -0.301469000 |

## D

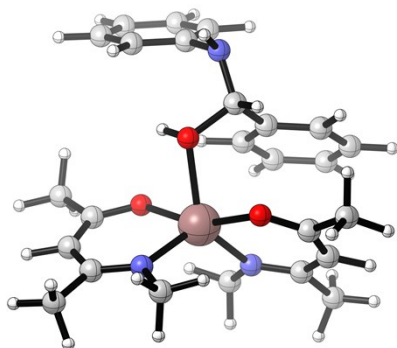

|    |              |              |              |
|----|--------------|--------------|--------------|
| In | 0.521320000  | -0.957837000 | 0.865998000  |
| O  | 2.585122000  | -0.710570000 | 0.419057000  |
| O  | -1.570883000 | -0.461324000 | 1.056038000  |
| N  | 0.291487000  | -2.366102000 | -0.743372000 |
| N  | 0.597226000  | -1.574540000 | 2.923259000  |
| C  | 3.122929000  | -1.110732000 | -0.702581000 |
| C  | 2.517510000  | -1.922042000 | -1.670567000 |
| H  | 3.138144000  | -2.140405000 | -2.548398000 |
| C  | 1.222078000  | -2.517177000 | -1.693869000 |
| C  | 4.533133000  | -0.622250000 | -0.909759000 |
| H  | 4.542888000  | 0.487932000  | -0.907131000 |
| H  | 4.978348000  | -0.987320000 | -1.852381000 |
| H  | 5.167108000  | -0.944927000 | -0.057980000 |
| C  | 0.889949000  | -3.380112000 | -2.887161000 |
| H  | 0.662267000  | -4.421199000 | -2.576865000 |
| H  | 1.725602000  | -3.407910000 | -3.608109000 |
| H  | -0.011483000 | -2.995852000 | -3.407051000 |
| C  | -1.749679000 | -1.011813000 | 3.397977000  |
| H  | -2.473052000 | -1.006846000 | 4.223536000  |
| C  | -2.238858000 | -0.525976000 | 2.178195000  |
| C  | -0.453764000 | -1.502665000 | 3.749650000  |
| C  | -3.651242000 | -0.010505000 | 2.075903000  |

|   |              |              |              |
|---|--------------|--------------|--------------|
| H | -3.627113000 | 1.030066000  | 1.689921000  |
| H | -4.190352000 | -0.035427000 | 3.039737000  |
| H | -4.209793000 | -0.609274000 | 1.327066000  |
| C | -0.268480000 | -1.960521000 | 5.177394000  |
| H | 0.063554000  | -3.018521000 | 5.212441000  |
| H | -1.204845000 | -1.869110000 | 5.754110000  |
| H | 0.517339000  | -1.364799000 | 5.686480000  |
| C | 0.870788000  | 1.418119000  | -1.536463000 |
| C | -0.312577000 | 0.707052000  | -1.823203000 |
| C | 1.865847000  | 1.527920000  | -2.527356000 |
| C | -0.489861000 | 0.114345000  | -3.084324000 |
| C | 1.687275000  | 0.934083000  | -3.784679000 |
| C | 0.507920000  | 0.222163000  | -4.065334000 |
| H | -1.120137000 | 0.625310000  | -1.078003000 |
| H | 2.785759000  | 2.092551000  | -2.310603000 |
| H | -1.425166000 | -0.422702000 | -3.303088000 |
| H | 2.472761000  | 1.026195000  | -4.549955000 |
| H | 0.365463000  | -0.241121000 | -5.052970000 |
| C | 1.090503000  | 2.116708000  | -0.206181000 |
| O | 0.494032000  | 1.304563000  | 0.899495000  |
| H | 2.168437000  | 2.127355000  | 0.040567000  |
| C | -1.431204000 | 3.629915000  | -1.556679000 |
| C | -0.835020000 | 3.595235000  | -0.279560000 |
| C | -2.826042000 | 3.706418000  | -1.676530000 |
| H | -3.284072000 | 3.736969000  | -2.676732000 |
| C | -1.651740000 | 3.662471000  | 0.871550000  |
| C | -3.638649000 | 3.770528000  | -0.530284000 |
| H | -1.185304000 | 3.664368000  | 1.870299000  |
| H | -4.731530000 | 3.847737000  | -0.632794000 |
| C | -3.048684000 | 3.762083000  | 0.743742000  |
| H | -3.674340000 | 3.842513000  | 1.645424000  |
| H | -0.786900000 | 3.606823000  | -2.446056000 |
| N | 0.588260000  | 3.456120000  | -0.159754000 |
| H | -0.476671000 | 1.499114000  | 0.908190000  |
| H | 0.950276000  | 3.948084000  | 0.665036000  |
| C | 1.891699000  | -2.068505000 | 3.402554000  |
| H | 2.255634000  | -1.486459000 | 4.274661000  |
| H | 1.838827000  | -3.137230000 | 3.701355000  |
| H | 2.642610000  | -1.969453000 | 2.596219000  |
| C | -1.016281000 | -3.005926000 | -0.877796000 |
| H | -1.551687000 | -2.659312000 | -1.788370000 |
| H | -0.930189000 | -4.111600000 | -0.930168000 |
| H | -1.644578000 | -2.745826000 | -0.006887000 |

### TS<sub>DE</sub>

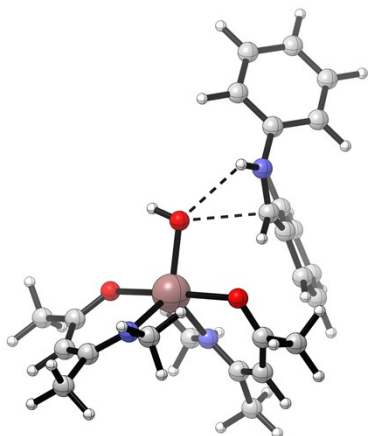

|    |              |              |             |
|----|--------------|--------------|-------------|
| In | 0.113205000  | -0.668988000 | 1.397607000 |
| O  | 2.062208000  | 0.042553000  | 0.630258000 |
| O  | -1.827962000 | -1.449086000 | 1.991803000 |

|   |              |              |              |
|---|--------------|--------------|--------------|
| N | 0.083088000  | -1.901300000 | -0.431158000 |
| N | 1.002232000  | -1.665472000 | 3.115311000  |
| C | 2.883393000  | -0.749821000 | 0.002605000  |
| C | 2.512859000  | -1.905433000 | -0.701053000 |
| H | 3.330009000  | -2.462471000 | -1.177081000 |
| C | 1.195618000  | -2.395380000 | -0.974560000 |
| C | 4.332120000  | -0.324387000 | 0.038081000  |
| H | 4.422449000  | 0.718042000  | -0.331519000 |
| H | 4.992501000  | -0.979606000 | -0.558081000 |
| H | 4.687816000  | -0.311096000 | 1.089674000  |
| C | 1.081310000  | -3.520094000 | -1.978186000 |
| H | 0.561054000  | -4.394412000 | -1.535521000 |
| H | 2.072205000  | -3.845380000 | -2.338279000 |
| H | 0.473995000  | -3.208336000 | -2.852906000 |
| C | -0.967451000 | -3.055542000 | 3.571901000  |
| H | -1.288379000 | -3.911689000 | 4.179567000  |
| C | -1.973281000 | -2.464387000 | 2.788623000  |
| C | 0.387151000  | -2.654546000 | 3.773670000  |
| C | -3.381772000 | -3.008002000 | 2.856693000  |
| H | -4.071990000 | -2.197117000 | 3.169048000  |
| H | -3.484344000 | -3.859797000 | 3.553103000  |
| H | -3.706832000 | -3.324413000 | 1.843632000  |
| C | 1.162896000  | -3.402217000 | 4.835946000  |
| H | 2.114115000  | -3.805874000 | 4.432342000  |
| H | 0.573177000  | -4.237945000 | 5.249890000  |
| H | 1.436540000  | -2.724945000 | 5.671907000  |
| C | -0.147228000 | 1.536952000  | -2.090663000 |
| C | -1.398115000 | 1.852194000  | -2.688972000 |
| C | 0.623530000  | 0.464798000  | -2.614328000 |
| C | -1.844367000 | 1.123037000  | -3.792422000 |
| C | 0.185992000  | -0.232251000 | -3.745503000 |
| C | -1.047923000 | 0.092891000  | -4.333870000 |
| H | -2.027420000 | 2.648958000  | -2.271822000 |
| H | 1.571444000  | 0.187226000  | -2.132396000 |
| H | -2.820000000 | 1.357432000  | -4.242192000 |
| H | 0.805956000  | -1.038016000 | -4.164908000 |
| H | -1.399141000 | -0.460985000 | -5.217445000 |
| C | 0.356775000  | 2.156262000  | -0.884672000 |
| O | -0.510244000 | 1.299513000  | 1.432901000  |
| H | 1.104564000  | 1.582821000  | -0.306982000 |
| C | -0.470994000 | 4.881736000  | -2.214146000 |
| C | -0.734726000 | 4.392970000  | -0.920006000 |
| C | -1.252288000 | 5.928985000  | -2.718326000 |
| H | -1.048383000 | 6.321096000  | -3.725213000 |
| C | -1.744437000 | 4.959084000  | -0.120121000 |
| C | -2.277282000 | 6.490863000  | -1.935032000 |
| H | -1.928774000 | 4.567316000  | 0.891212000  |
| H | -2.881609000 | 7.318457000  | -2.334552000 |
| C | -2.518372000 | 6.008690000  | -0.637589000 |
| H | -3.313688000 | 6.452556000  | -0.020933000 |
| H | 0.344750000  | 4.447857000  | -2.810204000 |
| N | 0.057312000  | 3.336178000  | -0.378759000 |
| H | -1.425450000 | 1.282083000  | 1.776851000  |
| H | 0.328577000  | 3.424737000  | 0.611804000  |
| C | 2.369397000  | -1.284171000 | 3.467380000  |
| H | 2.470816000  | -1.052900000 | 4.548258000  |
| H | 3.101830000  | -2.084082000 | 3.219454000  |
| H | 2.650846000  | -0.381803000 | 2.894278000  |
| C | -1.222400000 | -2.383756000 | -0.877231000 |
| H | -1.384717000 | -2.162097000 | -1.954696000 |
| H | -1.338524000 | -3.480069000 | -0.733909000 |
| H | -2.013638000 | -1.887424000 | -0.288559000 |

**E**



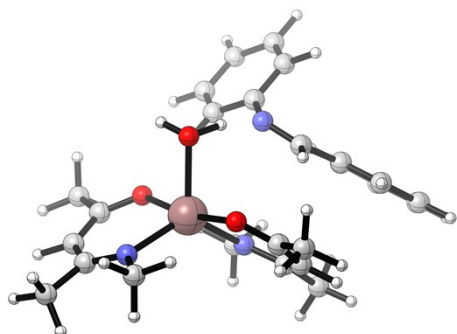

|    |              |              |              |
|----|--------------|--------------|--------------|
| In | 0.671905000  | -0.560712000 | 1.586072000  |
| O  | 2.718860000  | -0.550956000 | 0.941540000  |
| O  | -1.356646000 | -0.182849000 | 2.248554000  |
| N  | 0.079025000  | -1.223355000 | -0.399561000 |
| N  | 0.986133000  | -1.807262000 | 3.327418000  |
| C  | 3.159125000  | -1.034717000 | -0.182771000 |
| C  | 2.368994000  | -1.533448000 | -1.229748000 |
| H  | 2.920435000  | -1.905372000 | -2.102957000 |
| C  | 0.949436000  | -1.609663000 | -1.342727000 |
| C  | 4.661779000  | -1.024904000 | -0.314327000 |
| H  | 5.044978000  | -0.003651000 | -0.113044000 |
| H  | 5.010266000  | -1.363016000 | -1.306936000 |
| H  | 5.104378000  | -1.682714000 | 0.462761000  |
| C  | 0.401132000  | -2.153591000 | -2.640129000 |
| H  | -0.240545000 | -3.040443000 | -2.456953000 |
| H  | 1.212488000  | -2.442057000 | -3.329108000 |
| H  | -0.233314000 | -1.397330000 | -3.147090000 |
| C  | -1.349577000 | -1.729135000 | 4.093988000  |
| H  | -2.010132000 | -2.150129000 | 4.862764000  |
| C  | -1.949562000 | -0.802674000 | 3.233427000  |
| C  | 0.005835000  | -2.175591000 | 4.162032000  |
| C  | -3.401266000 | -0.434870000 | 3.409947000  |
| H  | -3.488710000 | 0.661578000  | 3.559005000  |
| H  | -3.876302000 | -0.954459000 | 4.261138000  |
| H  | -3.961387000 | -0.675295000 | 2.481669000  |
| C  | 0.345213000  | -3.127066000 | 5.285931000  |
| H  | 0.780759000  | -4.068177000 | 4.892374000  |
| H  | -0.546897000 | -3.376987000 | 5.885207000  |
| H  | 1.107382000  | -2.685168000 | 5.961330000  |
| C  | 0.606641000  | 1.380202000  | -2.790798000 |
| C  | -0.708258000 | 1.357959000  | -3.325820000 |
| C  | 1.682728000  | 0.941514000  | -3.603569000 |
| C  | -0.924206000 | 0.913433000  | -4.635475000 |
| C  | 1.463221000  | 0.518420000  | -4.919739000 |
| C  | 0.157092000  | 0.501960000  | -5.438139000 |
| H  | -1.560297000 | 1.684102000  | -2.716997000 |
| H  | 2.700283000  | 0.931638000  | -3.183971000 |
| H  | -1.947123000 | 0.893197000  | -5.040146000 |
| H  | 2.309801000  | 0.192680000  | -5.541579000 |
| H  | -0.022556000 | 0.164615000  | -6.469805000 |
| C  | 0.935209000  | 1.718238000  | -1.402936000 |
| O  | 0.888410000  | 1.602031000  | 1.905556000  |
| H  | 1.946043000  | 1.392694000  | -1.087513000 |
| C  | -1.225328000 | 3.972530000  | -1.478398000 |
| C  | -1.051369000 | 2.856879000  | -0.630458000 |
| C  | -2.488130000 | 4.570334000  | -1.585779000 |
| H  | -2.620022000 | 5.443965000  | -2.241410000 |
| C  | -2.132613000 | 2.369871000  | 0.135247000  |
| C  | -3.579333000 | 4.064498000  | -0.856332000 |
| H  | -1.985762000 | 1.516021000  | 0.814833000  |
| H  | -4.569079000 | 4.535406000  | -0.947465000 |
| C  | -3.395851000 | 2.967712000  | 0.002589000  |
| H  | -4.244113000 | 2.575001000  | 0.583108000  |

|   |              |              |              |
|---|--------------|--------------|--------------|
| H | -0.365821000 | 4.363123000  | -2.042221000 |
| N | 0.226470000  | 2.265993000  | -0.463628000 |
| H | 0.160596000  | 1.901745000  | 2.488229000  |
| H | 0.658825000  | 2.020802000  | 0.924971000  |
| C | 2.352952000  | -2.293091000 | 3.539886000  |
| H | 2.723756000  | -2.032067000 | 4.553030000  |
| H | 2.422222000  | -3.396366000 | 3.424102000  |
| H | 3.022728000  | -1.821170000 | 2.799138000  |
| C | -1.357557000 | -1.288217000 | -0.672844000 |
| H | -1.628942000 | -0.657016000 | -1.545789000 |
| H | -1.695534000 | -2.325109000 | -0.883138000 |
| H | -1.909793000 | -0.914520000 | 0.206418000  |

## F

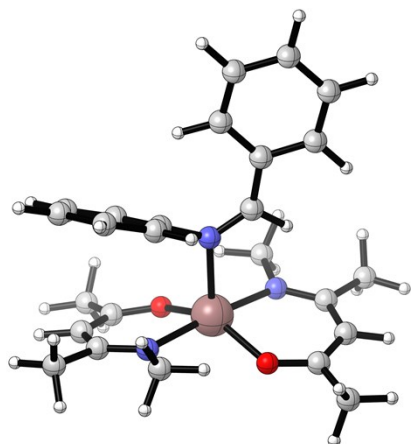

|    |              |              |              |
|----|--------------|--------------|--------------|
| In | 0.157988000  | -1.455688000 | 0.651067000  |
| O  | 2.262591000  | -1.834822000 | 0.631025000  |
| O  | -1.790804000 | -2.066018000 | 1.271553000  |
| N  | -0.021524000 | -2.732979000 | -1.127462000 |
| N  | 0.365917000  | -0.346968000 | 2.521726000  |
| C  | 2.932628000  | -2.459373000 | -0.294424000 |
| C  | 2.386455000  | -3.090507000 | -1.420511000 |
| H  | 3.109939000  | -3.570542000 | -2.091594000 |
| C  | 1.018554000  | -3.250521000 | -1.792736000 |
| C  | 4.423349000  | -2.479824000 | -0.067390000 |
| H  | 4.802277000  | -1.440461000 | 0.018650000  |
| H  | 4.973851000  | -3.004337000 | -0.868986000 |
| H  | 4.637811000  | -2.974296000 | 0.902883000  |
| C  | 0.745138000  | -4.066096000 | -3.036233000 |
| H  | 0.132328000  | -4.958920000 | -2.794041000 |
| H  | 1.682289000  | -4.406655000 | -3.508084000 |
| H  | 0.164558000  | -3.481526000 | -3.779634000 |
| C  | -1.943392000 | -0.712638000 | 3.259280000  |
| H  | -2.643920000 | -0.436425000 | 4.057770000  |
| C  | -2.434416000 | -1.621920000 | 2.317599000  |
| C  | -0.649013000 | -0.117967000 | 3.359146000  |
| C  | -3.829271000 | -2.177774000 | 2.458317000  |
| H  | -4.415571000 | -1.956460000 | 1.541982000  |
| H  | -4.361887000 | -1.775093000 | 3.338531000  |
| H  | -3.776043000 | -3.283573000 | 2.539725000  |
| C  | -0.435929000 | 0.845461000  | 4.502787000  |
| H  | 0.400327000  | 0.522180000  | 5.156291000  |
| H  | -1.345171000 | 0.943729000  | 5.121017000  |
| H  | -0.166894000 | 1.848463000  | 4.110969000  |
| C  | 0.155857000  | 1.531623000  | -2.833004000 |
| C  | -0.576583000 | 2.740716000  | -2.684978000 |
| C  | 0.834107000  | 1.282144000  | -4.056204000 |
| C  | -0.608768000 | 3.667488000  | -3.731013000 |
| C  | 0.813114000  | 2.223441000  | -5.090651000 |

|   |              |              |              |
|---|--------------|--------------|--------------|
| C | 0.091223000  | 3.418656000  | -4.927781000 |
| H | -1.130823000 | 2.945823000  | -1.761225000 |
| H | 1.385275000  | 0.336721000  | -4.181288000 |
| H | -1.184687000 | 4.597507000  | -3.615770000 |
| H | 1.351077000  | 2.024793000  | -6.029016000 |
| H | 0.065419000  | 4.159528000  | -5.741617000 |
| C | 0.235190000  | 0.472982000  | -1.833730000 |
| H | 0.640147000  | -0.487898000 | -2.205965000 |
| C | 0.357726000  | 2.627254000  | 0.471881000  |
| C | -0.544445000 | 1.584990000  | 0.176479000  |
| C | -0.054868000 | 3.683938000  | 1.296908000  |
| H | 0.648455000  | 4.498301000  | 1.527606000  |
| C | -1.842667000 | 1.588909000  | 0.720175000  |
| C | -1.356711000 | 3.702384000  | 1.829494000  |
| H | -2.525176000 | 0.756169000  | 0.498125000  |
| H | -1.675330000 | 4.533477000  | 2.475900000  |
| C | -2.247640000 | 2.654893000  | 1.537504000  |
| H | -3.264572000 | 2.660022000  | 1.955931000  |
| H | 1.374664000  | 2.598779000  | 0.054715000  |
| N | -0.109403000 | 0.453619000  | -0.576754000 |
| C | 1.658947000  | 0.299566000  | 2.756861000  |
| H | 1.580471000  | 1.405335000  | 2.675885000  |
| H | 2.056581000  | 0.055831000  | 3.764632000  |
| H | 2.387600000  | -0.066757000 | 2.014138000  |
| C | -1.383475000 | -2.970370000 | -1.613664000 |
| H | -1.543711000 | -2.529747000 | -2.621753000 |
| H | -1.613621000 | -4.054507000 | -1.678643000 |
| H | -2.104295000 | -2.523645000 | -0.908190000 |

## H<sub>2</sub>O

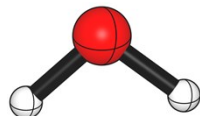

|   |             |             |              |
|---|-------------|-------------|--------------|
| O | 2.690132000 | 7.167205000 | 10.675903000 |
| H | 2.690132000 | 7.926184000 | 11.288194000 |
| H | 2.690132000 | 6.408226000 | 11.288194000 |

## 12.2 XYZ coordinates of the molecules present in Fig. 12

### G'

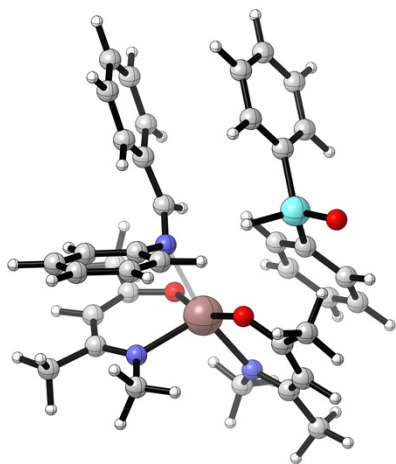

|    |             |             |              |
|----|-------------|-------------|--------------|
| In | 7.312650000 | 2.327328000 | 8.272661000  |
| O  | 9.304971000 | 3.077004000 | 8.403975000  |
| O  | 5.327891000 | 1.931171000 | 7.536933000  |
| N  | 8.113698000 | 0.323905000 | 8.024698000  |
| N  | 6.599252000 | 2.389240000 | 10.326795000 |

|   |              |              |              |
|---|--------------|--------------|--------------|
| C | 10.404178000 | 2.374297000  | 8.323074000  |
| C | 10.470110000 | 0.982655000  | 8.191801000  |
| H | 11.483347000 | 0.562320000  | 8.158589000  |
| C | 9.417220000  | 0.031243000  | 8.044999000  |
| C | 11.657192000 | 3.203579000  | 8.330093000  |
| H | 11.666492000 | 3.811743000  | 7.395140000  |
| H | 12.574987000 | 2.590318000  | 8.377571000  |
| H | 11.638242000 | 3.910859000  | 9.184356000  |
| C | 9.826326000  | -1.414776000 | 7.889411000  |
| H | 9.365169000  | -2.047462000 | 8.675767000  |
| H | 10.922390000 | -1.532796000 | 7.942100000  |
| H | 9.475806000  | -1.815399000 | 6.915513000  |
| C | 4.254304000  | 2.505100000  | 9.635906000  |
| H | 3.253494000  | 2.689357000  | 10.048107000 |
| C | 4.278226000  | 2.210016000  | 8.266223000  |
| C | 5.308769000  | 2.544820000  | 10.608566000 |
| C | 2.984125000  | 2.195157000  | 7.487736000  |
| H | 3.009329000  | 2.991917000  | 6.713781000  |
| H | 2.094359000  | 2.345678000  | 8.125037000  |
| H | 2.887836000  | 1.231977000  | 6.946401000  |
| C | 4.905078000  | 2.796439000  | 12.042230000 |
| H | 5.206652000  | 1.949352000  | 12.693534000 |
| H | 3.814466000  | 2.936134000  | 12.140952000 |
| H | 5.417662000  | 3.698555000  | 12.436579000 |
| C | 5.402021000  | 6.306460000  | 6.758156000  |
| C | 4.509103000  | 6.353001000  | 5.656447000  |
| C | 5.796934000  | 7.524029000  | 7.373731000  |
| C | 3.998982000  | 7.571547000  | 5.197124000  |
| C | 5.293612000  | 8.739234000  | 6.901528000  |
| C | 4.387805000  | 8.767537000  | 5.823269000  |
| H | 4.228881000  | 5.414827000  | 5.153665000  |
| H | 6.505047000  | 7.518113000  | 8.210914000  |
| H | 3.305949000  | 7.592084000  | 4.343382000  |
| H | 5.607536000  | 9.678778000  | 7.379229000  |
| H | 3.991361000  | 9.729456000  | 5.465463000  |
| C | 5.910709000  | 4.982705000  | 7.100374000  |
| H | 5.611099000  | 4.189522000  | 6.392644000  |
| C | 5.942328000  | 5.720688000  | 10.088004000 |
| C | 6.991206000  | 5.367928000  | 9.211357000  |
| C | 6.226393000  | 6.440587000  | 11.256125000 |
| H | 5.407328000  | 6.717421000  | 11.936850000 |
| C | 8.321002000  | 5.714554000  | 9.516504000  |
| C | 7.550462000  | 6.811542000  | 11.555446000 |
| H | 9.129978000  | 5.392793000  | 8.847848000  |
| H | 7.771301000  | 7.379119000  | 12.471404000 |
| C | 8.590285000  | 6.447867000  | 10.683500000 |
| H | 9.627735000  | 6.732692000  | 10.913676000 |
| H | 4.914860000  | 5.414266000  | 9.842916000  |
| N | 6.682877000  | 4.575661000  | 8.065791000  |
| C | 7.610992000  | 2.481929000  | 11.375334000 |
| H | 7.654252000  | 3.505996000  | 11.805612000 |
| H | 7.421888000  | 1.768058000  | 12.203915000 |
| H | 8.605479000  | 2.256504000  | 10.948232000 |
| C | 7.121781000  | -0.738167000 | 7.872913000  |
| H | 7.295627000  | -1.340221000 | 6.957044000  |
| H | 7.126041000  | -1.429997000 | 8.743543000  |
| H | 6.116484000  | -0.286729000 | 7.792185000  |
| P | 9.355352000  | 4.498514000  | 5.530521000  |
| O | 10.870574000 | 4.588869000  | 5.460149000  |
| H | 8.799988000  | 4.889764000  | 6.787184000  |
| C | 8.358916000  | 5.545473000  | 4.419643000  |
| C | 7.909666000  | 5.093626000  | 3.160778000  |
| C | 8.070767000  | 6.864182000  | 4.833497000  |
| C | 7.163832000  | 5.949332000  | 2.335092000  |
| C | 7.335501000  | 7.719736000  | 4.001283000  |
| C | 6.876760000  | 7.260094000  | 2.754943000  |

|   |              |              |             |
|---|--------------|--------------|-------------|
| H | 8.141950000  | 4.070837000  | 2.826921000 |
| H | 8.423286000  | 7.223221000  | 5.813461000 |
| H | 6.812390000  | 5.595276000  | 1.354650000 |
| H | 7.113876000  | 8.745510000  | 4.328558000 |
| H | 6.297616000  | 7.930605000  | 2.101877000 |
| C | 8.766171000  | 2.781177000  | 5.242304000 |
| C | 7.404954000  | 2.413986000  | 5.129182000 |
| C | 9.766253000  | 1.806753000  | 5.058196000 |
| C | 7.050055000  | 1.085463000  | 4.841425000 |
| C | 9.407556000  | 0.483076000  | 4.755878000 |
| C | 8.054032000  | 0.121813000  | 4.648185000 |
| H | 6.616840000  | 3.177765000  | 5.186702000 |
| H | 10.819834000 | 2.117134000  | 5.128989000 |
| H | 5.988090000  | 0.813302000  | 4.757395000 |
| H | 10.193792000 | -0.269298000 | 4.590895000 |
| H | 7.778636000  | -0.912450000 | 4.391622000 |

### TS<sub>G'H'</sub>

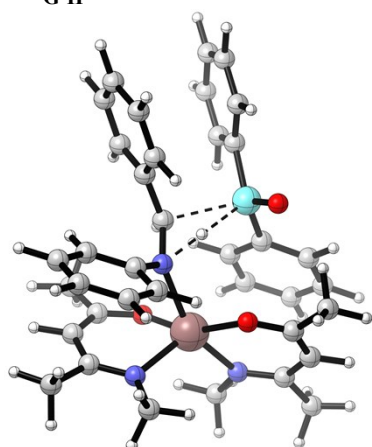

|    |              |              |              |
|----|--------------|--------------|--------------|
| In | 7.455278000  | 2.254566000  | 8.655951000  |
| O  | 9.452483000  | 3.028665000  | 8.778580000  |
| O  | 5.513218000  | 1.840792000  | 7.781168000  |
| N  | 8.307256000  | 0.342203000  | 8.093442000  |
| N  | 6.605728000  | 2.247922000  | 10.638288000 |
| C  | 10.530629000 | 2.460886000  | 8.325580000  |
| C  | 10.626305000 | 1.122738000  | 7.916686000  |
| H  | 11.624895000 | 0.789105000  | 7.606355000  |
| C  | 9.606584000  | 0.130364000  | 7.848791000  |
| C  | 11.718972000 | 3.378771000  | 8.238798000  |
| H  | 11.455961000 | 4.194573000  | 7.531215000  |
| H  | 12.637552000 | 2.866654000  | 7.899908000  |
| H  | 11.902973000 | 3.852411000  | 9.224583000  |
| C  | 10.039761000 | -1.266826000 | 7.469040000  |
| H  | 9.821173000  | -1.979956000 | 8.291353000  |
| H  | 11.120914000 | -1.307402000 | 7.250991000  |
| H  | 9.482907000  | -1.629240000 | 6.581364000  |
| C  | 4.371184000  | 2.692862000  | 9.741468000  |
| H  | 3.383998000  | 3.056565000  | 10.054962000 |
| C  | 4.456562000  | 2.296427000  | 8.398540000  |
| C  | 5.337558000  | 2.631891000  | 10.797152000 |
| C  | 3.226392000  | 2.375339000  | 7.524443000  |
| H  | 3.422117000  | 3.056271000  | 6.668866000  |
| H  | 2.330251000  | 2.728921000  | 8.065153000  |
| H  | 3.017015000  | 1.375856000  | 7.091200000  |
| C  | 4.878285000  | 3.047360000  | 12.173214000 |
| H  | 5.011488000  | 2.228862000  | 12.910577000 |
| H  | 3.817121000  | 3.348856000  | 12.171058000 |
| H  | 5.487715000  | 3.906035000  | 12.526730000 |
| C  | 6.143323000  | 6.247653000  | 6.697857000  |

|   |              |              |              |
|---|--------------|--------------|--------------|
| C | 5.055204000  | 6.491762000  | 5.834173000  |
| C | 6.904916000  | 7.334562000  | 7.186420000  |
| C | 4.722768000  | 7.803926000  | 5.470609000  |
| C | 6.565895000  | 8.643150000  | 6.824119000  |
| C | 5.474162000  | 8.880944000  | 5.968948000  |
| H | 4.474711000  | 5.645283000  | 5.438359000  |
| H | 7.774333000  | 7.150217000  | 7.834401000  |
| H | 3.875026000  | 7.987158000  | 4.794226000  |
| H | 7.161708000  | 9.485214000  | 7.205305000  |
| H | 5.213092000  | 9.911266000  | 5.684762000  |
| C | 6.515928000  | 4.849134000  | 6.997718000  |
| H | 5.928388000  | 4.085616000  | 6.453886000  |
| C | 5.581925000  | 5.880234000  | 9.746278000  |
| C | 6.813178000  | 5.247930000  | 9.458448000  |
| C | 5.428751000  | 6.604542000  | 10.936003000 |
| H | 4.467393000  | 7.094887000  | 11.151121000 |
| C | 7.881910000  | 5.350866000  | 10.374581000 |
| C | 6.489777000  | 6.699144000  | 11.854960000 |
| H | 8.834455000  | 4.858676000  | 10.127798000 |
| H | 6.363727000  | 7.267225000  | 12.788536000 |
| C | 7.714234000  | 6.069946000  | 11.568101000 |
| H | 8.554133000  | 6.149936000  | 12.275673000 |
| H | 4.745124000  | 5.786201000  | 9.040282000  |
| N | 6.956998000  | 4.423059000  | 8.315014000  |
| C | 7.514838000  | 2.181360000  | 11.779529000 |
| H | 7.651560000  | 3.176621000  | 12.253917000 |
| H | 7.151263000  | 1.473765000  | 12.554299000 |
| H | 8.507339000  | 1.831857000  | 11.439443000 |
| C | 7.350510000  | -0.757933000 | 7.982675000  |
| H | 7.351511000  | -1.200216000 | 6.964420000  |
| H | 7.569725000  | -1.568714000 | 8.709544000  |
| H | 6.331995000  | -0.376729000 | 8.176440000  |
| P | 8.416450000  | 4.552498000  | 5.484731000  |
| O | 9.717192000  | 5.093748000  | 6.064308000  |
| H | 7.769504000  | 4.685461000  | 7.211461000  |
| C | 7.683530000  | 5.474462000  | 4.129232000  |
| C | 6.716449000  | 4.919897000  | 3.262502000  |
| C | 8.035526000  | 6.840418000  | 4.034401000  |
| C | 6.093547000  | 5.740771000  | 2.311385000  |
| C | 7.402659000  | 7.649004000  | 3.082688000  |
| C | 6.428888000  | 7.103429000  | 2.226772000  |
| H | 6.462923000  | 3.850689000  | 3.315713000  |
| H | 8.799055000  | 7.251361000  | 4.710913000  |
| H | 5.346402000  | 5.312097000  | 1.626472000  |
| H | 7.672692000  | 8.712421000  | 3.005815000  |
| H | 5.933526000  | 7.743362000  | 1.481154000  |
| C | 8.381042000  | 2.767225000  | 5.160686000  |
| C | 7.184105000  | 2.018827000  | 5.051403000  |
| C | 9.630093000  | 2.135045000  | 4.965501000  |
| C | 7.241035000  | 0.661389000  | 4.707816000  |
| C | 9.672638000  | 0.780277000  | 4.606753000  |
| C | 8.482662000  | 0.046817000  | 4.467395000  |
| H | 6.203230000  | 2.474843000  | 5.245060000  |
| H | 10.555122000 | 2.718625000  | 5.078904000  |
| H | 6.308423000  | 0.085080000  | 4.624086000  |
| H | 10.644614000 | 0.294644000  | 4.435697000  |
| H | 8.521526000  | -1.011692000 | 4.169229000  |

**H'**

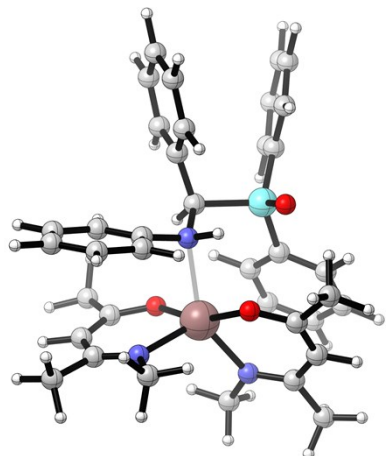

|    |              |              |              |
|----|--------------|--------------|--------------|
| In | 7.501481000  | 2.407693000  | 8.645874000  |
| O  | 9.517879000  | 3.099572000  | 8.908893000  |
| O  | 5.477130000  | 2.225347000  | 7.950093000  |
| N  | 8.270388000  | 0.483383000  | 8.050713000  |
| N  | 6.839665000  | 2.385929000  | 10.705136000 |
| C  | 10.547868000 | 2.551558000  | 8.327747000  |
| C  | 10.587107000 | 1.246051000  | 7.813788000  |
| H  | 11.560380000 | 0.921742000  | 7.423246000  |
| C  | 9.556341000  | 0.263765000  | 7.751723000  |
| C  | 11.744783000 | 3.453195000  | 8.216528000  |
| H  | 11.471226000 | 4.262950000  | 7.505347000  |
| H  | 12.649391000 | 2.931360000  | 7.856212000  |
| H  | 11.953536000 | 3.930890000  | 9.194725000  |
| C  | 9.957960000  | -1.126386000 | 7.318087000  |
| H  | 9.796694000  | -1.851190000 | 8.143839000  |
| H  | 11.021889000 | -1.163405000 | 7.027699000  |
| H  | 9.342778000  | -1.474129000 | 6.464119000  |
| C  | 4.456649000  | 2.305750000  | 10.143992000 |
| H  | 3.467467000  | 2.319779000  | 10.618966000 |
| C  | 4.439974000  | 2.252999000  | 8.746935000  |
| C  | 5.554135000  | 2.377883000  | 11.059246000 |
| C  | 3.119877000  | 2.237635000  | 8.014885000  |
| H  | 3.042312000  | 3.142413000  | 7.374665000  |
| H  | 2.249959000  | 2.207619000  | 8.695489000  |
| H  | 3.080303000  | 1.362961000  | 7.333395000  |
| C  | 5.212189000  | 2.470643000  | 12.526590000 |
| H  | 5.700051000  | 1.660554000  | 13.106644000 |
| H  | 4.122910000  | 2.416535000  | 12.694419000 |
| H  | 5.582411000  | 3.431673000  | 12.940754000 |
| C  | 6.362282000  | 6.435215000  | 6.581366000  |
| C  | 5.259866000  | 6.736544000  | 5.758814000  |
| C  | 7.184570000  | 7.480402000  | 7.046989000  |
| C  | 4.988849000  | 8.062672000  | 5.392769000  |
| C  | 6.904959000  | 8.808389000  | 6.691570000  |
| C  | 5.812602000  | 9.101615000  | 5.857999000  |
| H  | 4.622813000  | 5.921002000  | 5.382691000  |
| H  | 8.059780000  | 7.256823000  | 7.674204000  |
| H  | 4.130591000  | 8.287422000  | 4.742259000  |
| H  | 7.550768000  | 9.618454000  | 7.061270000  |
| H  | 5.600390000  | 10.142757000 | 5.572546000  |
| C  | 6.735123000  | 4.991043000  | 6.813565000  |
| H  | 5.864714000  | 4.325208000  | 6.643194000  |
| C  | 5.364072000  | 5.459944000  | 9.422053000  |
| C  | 6.753279000  | 5.286223000  | 9.310260000  |
| C  | 4.825008000  | 5.949429000  | 10.621320000 |
| H  | 3.737292000  | 6.091189000  | 10.705077000 |
| C  | 7.601855000  | 5.608486000  | 10.385388000 |
| C  | 5.662315000  | 6.262657000  | 11.704828000 |

|   |              |              |              |
|---|--------------|--------------|--------------|
| H | 8.687891000  | 5.458002000  | 10.280776000 |
| H | 5.233769000  | 6.653500000  | 12.639532000 |
| C | 7.053150000  | 6.095043000  | 11.580718000 |
| H | 7.719075000  | 6.355889000  | 12.416936000 |
| H | 4.705604000  | 5.223760000  | 8.576556000  |
| N | 7.338299000  | 4.694373000  | 8.132466000  |
| C | 7.888716000  | 2.471312000  | 11.720159000 |
| H | 7.770520000  | 3.376283000  | 12.351696000 |
| H | 7.890932000  | 1.581139000  | 12.385700000 |
| H | 8.873584000  | 2.535920000  | 11.221575000 |
| C | 7.292170000  | -0.599276000 | 7.974547000  |
| H | 7.231566000  | -1.027477000 | 6.952746000  |
| H | 7.532750000  | -1.420777000 | 8.682185000  |
| H | 6.290355000  | -0.207211000 | 8.227910000  |
| P | 8.144360000  | 4.558320000  | 5.616966000  |
| O | 9.447356000  | 4.984186000  | 6.295070000  |
| H | 8.359730000  | 4.903993000  | 8.068362000  |
| C | 7.742569000  | 5.446455000  | 4.094651000  |
| C | 6.806316000  | 4.954229000  | 3.163615000  |
| C | 8.306948000  | 6.729073000  | 3.937907000  |
| C | 6.416708000  | 5.762011000  | 2.084630000  |
| C | 7.907790000  | 7.529983000  | 2.859224000  |
| C | 6.959380000  | 7.050445000  | 1.938857000  |
| H | 6.384023000  | 3.944062000  | 3.276139000  |
| H | 9.044206000  | 7.086571000  | 4.671718000  |
| H | 5.688398000  | 5.384246000  | 1.351110000  |
| H | 8.338679000  | 8.534328000  | 2.736144000  |
| H | 6.646880000  | 7.683472000  | 1.094603000  |
| C | 8.049301000  | 2.772982000  | 5.267405000  |
| C | 6.829936000  | 2.064128000  | 5.176716000  |
| C | 9.266406000  | 2.130573000  | 4.947894000  |
| C | 6.830260000  | 0.727571000  | 4.749518000  |
| C | 9.255243000  | 0.798493000  | 4.511943000  |
| C | 8.039540000  | 0.100374000  | 4.403991000  |
| H | 5.878822000  | 2.540814000  | 5.451389000  |
| H | 10.208930000 | 2.690459000  | 5.036168000  |
| H | 5.879975000  | 0.178261000  | 4.678624000  |
| H | 10.201252000 | 0.302662000  | 4.248683000  |
| H | 8.034039000  | -0.939735000 | 4.044401000  |

### Ph<sub>2</sub>P(=O)H

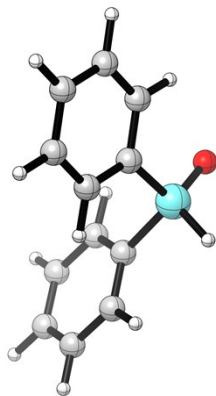

|   |              |              |             |
|---|--------------|--------------|-------------|
| P | 7.959708000  | 4.362247000  | 5.402504000 |
| O | 9.159385000  | 5.007864000  | 6.064173000 |
| C | 8.386829000  | -0.167324000 | 4.528393000 |
| C | 9.511806000  | 0.676707000  | 4.515505000 |
| C | 7.117676000  | 0.351417000  | 4.837800000 |
| H | 10.506030000 | 0.264940000  | 4.283943000 |
| H | 6.240100000  | -0.312646000 | 4.863316000 |
| C | 9.369660000  | 2.043063000  | 4.799920000 |
| C | 6.971078000  | 1.718273000  | 5.125878000 |



|   |              |              |             |
|---|--------------|--------------|-------------|
| H | 10.241327000 | 2.715850000  | 4.809314000 |
| H | 5.980021000  | 2.123254000  | 5.388115000 |
| C | 8.094929000  | 2.566865000  | 5.093911000 |
| H | 8.501391000  | -1.238655000 | 4.302469000 |
| C | 6.631168000  | 4.556218000  | 2.877059000 |
| C | 7.564952000  | 5.109812000  | 3.775288000 |
| C | 6.384703000  | 5.190923000  | 1.650092000 |
| H | 5.658499000  | 4.758693000  | 0.944424000 |
| C | 8.258863000  | 6.288238000  | 3.440199000 |
| C | 7.071081000  | 6.372769000  | 1.318167000 |
| H | 8.994454000  | 6.687244000  | 4.156739000 |
| H | 6.876747000  | 6.866910000  | 0.353900000 |
| C | 8.008145000  | 6.919242000  | 2.210985000 |
| H | 8.547534000  | 7.842112000  | 1.948522000 |
| H | 6.105961000  | 3.620175000  | 3.124539000 |
| H | 6.704125000  | 4.429625000  | 6.113156000 |

### 12.3 XYZ coordinates of the molecules present in Fig. 13

G

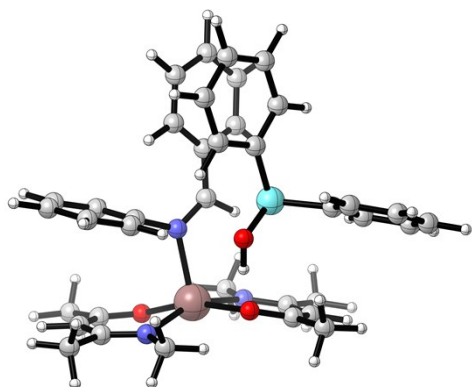

|    |              |              |              |
|----|--------------|--------------|--------------|
| In | 6.924810000  | 1.974411000  | 9.097445000  |
| O  | 8.953091000  | 1.832796000  | 8.298800000  |
| O  | 5.112057000  | 1.658526000  | 10.210689000 |
| N  | 6.455961000  | 0.238198000  | 7.834773000  |
| N  | 7.710035000  | 3.067063000  | 10.816944000 |
| C  | 9.463986000  | 0.878682000  | 7.553887000  |
| C  | 8.734159000  | -0.175676000 | 7.008957000  |
| H  | 9.310315000  | -0.879001000 | 6.394805000  |
| C  | 7.335987000  | -0.455879000 | 7.106000000  |
| C  | 10.942707000 | 1.003308000  | 7.308548000  |
| H  | 11.174842000 | 2.018468000  | 6.928350000  |
| H  | 11.317445000 | 0.259102000  | 6.583819000  |
| H  | 11.485942000 | 0.885552000  | 8.269713000  |
| C  | 6.836619000  | -1.635878000 | 6.303490000  |
| H  | 6.374093000  | -2.398366000 | 6.963717000  |
| H  | 7.656381000  | -2.113556000 | 5.740176000  |
| H  | 6.048008000  | -1.326135000 | 5.586976000  |
| C  | 5.497233000  | 3.383630000  | 11.838151000 |
| H  | 4.984988000  | 3.969920000  | 12.610720000 |
| C  | 4.708746000  | 2.438514000  | 11.171620000 |
| C  | 6.890459000  | 3.646464000  | 11.706977000 |
| C  | 3.263774000  | 2.250069000  | 11.559751000 |
| H  | 2.614829000  | 2.448873000  | 10.681458000 |
| H  | 2.954620000  | 2.902838000  | 12.395435000 |
| H  | 3.094822000  | 1.190786000  | 11.843076000 |
| C  | 7.476597000  | 4.649264000  | 12.673125000 |
| H  | 8.212777000  | 4.168517000  | 13.350520000 |
| H  | 6.688312000  | 5.112159000  | 13.291098000 |
| H  | 8.015916000  | 5.450527000  | 12.129504000 |

|   |              |              |              |
|---|--------------|--------------|--------------|
| C | 5.429234000  | 4.388616000  | 5.552736000  |
| C | 5.053773000  | 3.827052000  | 4.305186000  |
| C | 5.366760000  | 5.796688000  | 5.716379000  |
| C | 4.593923000  | 4.638093000  | 3.263321000  |
| C | 4.918371000  | 6.603658000  | 4.665171000  |
| C | 4.523310000  | 6.030962000  | 3.443909000  |
| H | 5.132369000  | 2.737499000  | 4.161704000  |
| H | 5.682132000  | 6.263205000  | 6.655338000  |
| H | 4.296832000  | 4.188371000  | 2.304463000  |
| H | 4.886728000  | 7.694576000  | 4.797886000  |
| H | 4.172228000  | 6.674227000  | 2.623120000  |
| C | 5.911323000  | 3.450493000  | 6.564123000  |
| H | 6.034211000  | 2.410698000  | 6.215433000  |
| C | 4.614780000  | 5.179620000  | 9.001638000  |
| C | 5.910073000  | 4.847756000  | 8.561710000  |
| C | 4.424546000  | 6.327723000  | 9.784285000  |
| H | 3.412237000  | 6.591864000  | 10.124389000 |
| C | 7.014710000  | 5.645118000  | 8.916417000  |
| C | 5.520080000  | 7.133511000  | 10.138169000 |
| H | 8.011223000  | 5.363798000  | 8.545770000  |
| H | 5.365916000  | 8.032860000  | 10.752467000 |
| C | 6.811596000  | 6.791295000  | 9.699757000  |
| H | 7.670354000  | 7.427009000  | 9.964372000  |
| H | 3.769479000  | 4.534202000  | 8.723449000  |
| N | 6.119348000  | 3.626915000  | 7.848174000  |
| C | 9.139004000  | 3.382418000  | 10.859975000 |
| H | 9.331014000  | 4.441213000  | 10.578474000 |
| H | 9.563484000  | 3.216251000  | 11.871362000 |
| H | 9.676920000  | 2.737776000  | 10.146552000 |
| C | 5.042442000  | -0.158279000 | 7.817039000  |
| H | 4.607056000  | -0.067160000 | 6.798184000  |
| H | 4.907972000  | -1.210105000 | 8.147493000  |
| H | 4.474842000  | 0.483573000  | 8.511234000  |
| P | 8.652281000  | 3.788797000  | 5.655546000  |
| O | 9.417529000  | 4.189826000  | 7.102814000  |
| C | 12.045758000 | 1.717669000  | 3.245137000  |
| C | 12.276102000 | 2.992415000  | 3.797362000  |
| C | 10.792345000 | 1.100980000  | 3.390280000  |
| H | 13.258056000 | 3.474584000  | 3.675209000  |
| H | 10.613480000 | 0.105944000  | 2.955865000  |
| C | 11.255119000 | 3.651921000  | 4.495769000  |
| C | 9.770081000  | 1.755482000  | 4.098470000  |
| H | 11.428501000 | 4.649285000  | 4.927680000  |
| H | 8.790805000  | 1.269827000  | 4.238750000  |
| C | 9.996188000  | 3.031871000  | 4.651512000  |
| H | 12.850579000 | 1.205456000  | 2.696281000  |
| C | 8.119794000  | 5.549428000  | 3.568029000  |
| C | 8.509274000  | 5.455010000  | 4.922054000  |
| C | 7.872925000  | 6.802753000  | 2.992790000  |
| H | 7.569523000  | 6.869126000  | 1.937261000  |
| C | 8.648300000  | 6.628448000  | 5.691353000  |
| C | 8.010647000  | 7.972576000  | 3.762282000  |
| H | 8.964191000  | 6.552541000  | 6.740585000  |
| H | 7.816722000  | 8.956187000  | 3.308440000  |
| C | 8.403283000  | 7.882689000  | 5.107657000  |
| H | 8.524133000  | 8.796827000  | 5.708679000  |
| H | 8.006633000  | 4.636144000  | 2.962036000  |
| H | 9.350924000  | 3.378948000  | 7.683249000  |

TS<sub>GH</sub>

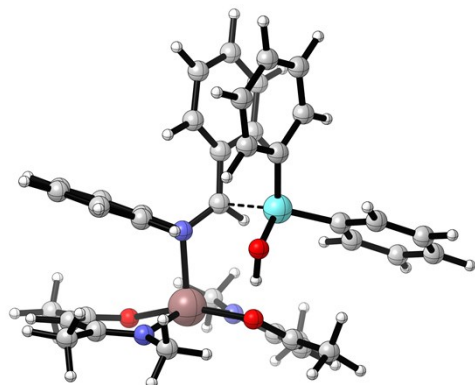

|    |              |              |              |
|----|--------------|--------------|--------------|
| In | 6.991321000  | 2.030911000  | 8.994490000  |
| O  | 9.027198000  | 1.948651000  | 8.141847000  |
| O  | 5.229619000  | 1.517671000  | 10.116534000 |
| N  | 6.647908000  | 0.233193000  | 7.767560000  |
| N  | 7.732703000  | 3.086046000  | 10.748808000 |
| C  | 9.633072000  | 0.908663000  | 7.613471000  |
| C  | 8.990920000  | -0.274502000 | 7.258417000  |
| H  | 9.632776000  | -1.056736000 | 6.834720000  |
| C  | 7.589477000  | -0.564902000 | 7.262443000  |
| C  | 11.104050000 | 1.095457000  | 7.361865000  |
| H  | 11.246631000 | 1.907616000  | 6.617002000  |
| H  | 11.589440000 | 0.178753000  | 6.982158000  |
| H  | 11.610608000 | 1.419185000  | 8.294183000  |
| C  | 7.170229000  | -1.860017000 | 6.605045000  |
| H  | 6.562926000  | -2.479793000 | 7.296447000  |
| H  | 8.045221000  | -2.448341000 | 6.279285000  |
| H  | 6.531493000  | -1.663785000 | 5.718150000  |
| C  | 5.501016000  | 3.253032000  | 11.760144000 |
| H  | 4.949080000  | 3.797983000  | 12.535829000 |
| C  | 4.778046000  | 2.259989000  | 11.084829000 |
| C  | 6.874920000  | 3.606327000  | 11.639560000 |
| C  | 3.348840000  | 1.973300000  | 11.473383000 |
| H  | 2.681945000  | 2.189721000  | 10.612381000 |
| H  | 3.013967000  | 2.560938000  | 12.346630000 |
| H  | 3.238945000  | 0.892083000  | 11.695035000 |
| C  | 7.393620000  | 4.637963000  | 12.614010000 |
| H  | 8.159103000  | 4.203995000  | 13.290497000 |
| H  | 6.575211000  | 5.044284000  | 13.232468000 |
| H  | 7.877612000  | 5.476243000  | 12.073564000 |
| C  | 5.673442000  | 4.478277000  | 5.429247000  |
| C  | 5.369301000  | 3.929974000  | 4.160672000  |
| C  | 5.451542000  | 5.859489000  | 5.644058000  |
| C  | 4.831653000  | 4.727676000  | 3.142184000  |
| C  | 4.919281000  | 6.654622000  | 4.620291000  |
| C  | 4.601352000  | 6.094940000  | 3.371572000  |
| H  | 5.560966000  | 2.860695000  | 3.975061000  |
| H  | 5.713734000  | 6.321740000  | 6.601898000  |
| H  | 4.591157000  | 4.281874000  | 2.165518000  |
| H  | 4.759947000  | 7.727768000  | 4.800096000  |
| H  | 4.182847000  | 6.725338000  | 2.572694000  |
| C  | 6.284025000  | 3.561680000  | 6.421872000  |
| H  | 6.404323000  | 2.529435000  | 6.048491000  |
| C  | 4.567802000  | 5.067200000  | 8.895074000  |
| C  | 5.893564000  | 4.828899000  | 8.485654000  |
| C  | 4.271932000  | 6.187547000  | 9.686480000  |
| H  | 3.234002000  | 6.373074000  | 10.001073000 |
| C  | 6.923997000  | 5.704697000  | 8.885089000  |
| C  | 5.295114000  | 7.066133000  | 10.081194000 |
| H  | 7.953169000  | 5.495076000  | 8.559674000  |
| H  | 5.059379000  | 7.942303000  | 10.703316000 |
| C  | 6.619761000  | 6.822829000  | 9.676894000  |

|   |              |              |              |
|---|--------------|--------------|--------------|
| H | 7.423742000  | 7.511194000  | 9.979707000  |
| H | 3.779875000  | 4.366546000  | 8.583767000  |
| N | 6.204474000  | 3.638644000  | 7.758413000  |
| C | 9.140583000  | 3.476580000  | 10.798848000 |
| H | 9.281735000  | 4.546256000  | 10.527942000 |
| H | 9.573504000  | 3.321262000  | 11.808617000 |
| H | 9.713341000  | 2.866114000  | 10.081330000 |
| C | 5.236423000  | -0.136055000 | 7.618687000  |
| H | 4.956563000  | -0.240194000 | 6.548834000  |
| H | 5.005347000  | -1.096772000 | 8.126400000  |
| H | 4.602016000  | 0.636794000  | 8.083819000  |
| P | 8.606790000  | 4.134210000  | 5.809067000  |
| O | 9.500885000  | 4.343632000  | 7.189072000  |
| C | 11.166279000 | 1.246455000  | 3.247090000  |
| C | 11.647593000 | 2.543646000  | 3.510269000  |
| C | 9.901150000  | 0.851684000  | 3.711669000  |
| H | 12.637924000 | 2.848808000  | 3.141071000  |
| H | 9.527869000  | -0.161663000 | 3.502519000  |
| C | 10.866253000 | 3.447459000  | 4.243704000  |
| C | 9.116008000  | 1.751830000  | 4.450322000  |
| H | 11.235499000 | 4.462157000  | 4.456598000  |
| H | 8.132522000  | 1.439784000  | 4.833094000  |
| C | 9.595714000  | 3.050288000  | 4.719003000  |
| H | 11.784974000 | 0.539646000  | 2.673341000  |
| C | 8.268222000  | 5.897212000  | 3.702352000  |
| C | 8.639785000  | 5.775687000  | 5.060096000  |
| C | 8.077304000  | 7.167256000  | 3.143171000  |
| H | 7.784029000  | 7.259475000  | 2.086965000  |
| C | 8.821934000  | 6.931442000  | 5.849313000  |
| C | 8.255526000  | 8.319102000  | 3.930086000  |
| H | 9.117756000  | 6.830452000  | 6.902576000  |
| H | 8.103277000  | 9.315480000  | 3.488458000  |
| C | 8.634720000  | 8.199299000  | 5.277886000  |
| H | 8.787777000  | 9.101076000  | 5.889520000  |
| H | 8.117413000  | 4.997252000  | 3.086724000  |
| H | 9.457565000  | 3.460095000  | 7.681101000  |

## H

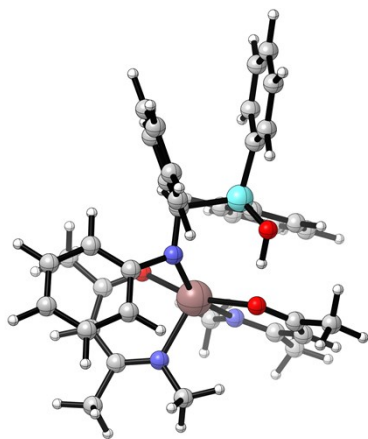

|    |              |             |              |
|----|--------------|-------------|--------------|
| In | 7.650196000  | 2.533383000 | 8.311964000  |
| O  | 9.691092000  | 3.310199000 | 7.830445000  |
| O  | 5.594373000  | 1.818631000 | 8.158834000  |
| N  | 8.542079000  | 0.533326000 | 7.992682000  |
| N  | 7.544880000  | 2.382218000 | 10.469247000 |
| C  | 10.797085000 | 2.618377000 | 7.646873000  |
| C  | 10.871973000 | 1.231460000 | 7.661775000  |
| H  | 11.875846000 | 0.812817000 | 7.513725000  |
| C  | 9.827094000  | 0.256810000 | 7.812729000  |
| C  | 12.022645000 | 3.454128000 | 7.388070000  |

|   |              |              |              |
|---|--------------|--------------|--------------|
| H | 11.864190000 | 4.075873000  | 6.481308000  |
| H | 12.932946000 | 2.843741000  | 7.249813000  |
| H | 12.179590000 | 4.160759000  | 8.229401000  |
| C | 10.258745000 | -1.191087000 | 7.752879000  |
| H | 9.984097000  | -1.727647000 | 8.685013000  |
| H | 11.348382000 | -1.285499000 | 7.603784000  |
| H | 9.743124000  | -1.721340000 | 6.924725000  |
| C | 5.101113000  | 2.237521000  | 10.490067000 |
| H | 4.247273000  | 2.334646000  | 11.172303000 |
| C | 4.764815000  | 2.003814000  | 9.147512000  |
| C | 6.375882000  | 2.353943000  | 11.117674000 |
| C | 3.308685000  | 1.911891000  | 8.756992000  |
| H | 3.093895000  | 2.668780000  | 7.974535000  |
| H | 2.624409000  | 2.073708000  | 9.608874000  |
| H | 3.103626000  | 0.917371000  | 8.308797000  |
| C | 6.387637000  | 2.476706000  | 12.622679000 |
| H | 6.989738000  | 1.669480000  | 13.088808000 |
| H | 5.367021000  | 2.436025000  | 13.040062000 |
| H | 6.851248000  | 3.438339000  | 12.925611000 |
| C | 6.280760000  | 6.285534000  | 6.096971000  |
| C | 5.306735000  | 6.660608000  | 5.152956000  |
| C | 7.107158000  | 7.269030000  | 6.674466000  |
| C | 5.165205000  | 8.004873000  | 4.777940000  |
| C | 6.960821000  | 8.614143000  | 6.302640000  |
| C | 5.995423000  | 8.983836000  | 5.350003000  |
| H | 4.662095000  | 5.892065000  | 4.697197000  |
| H | 7.860422000  | 6.966127000  | 7.415548000  |
| H | 4.401772000  | 8.290536000  | 4.038581000  |
| H | 7.603655000  | 9.380151000  | 6.761477000  |
| H | 5.883639000  | 10.039208000 | 5.058789000  |
| C | 6.530163000  | 4.811644000  | 6.390956000  |
| H | 5.642075000  | 4.228609000  | 6.023282000  |
| C | 4.809287000  | 5.285099000  | 8.673000000  |
| C | 6.203442000  | 5.059663000  | 8.777803000  |
| C | 4.079091000  | 5.758359000  | 9.772755000  |
| H | 2.995871000  | 5.925943000  | 9.670593000  |
| C | 6.844132000  | 5.366673000  | 10.003078000 |
| C | 4.716563000  | 6.012482000  | 10.998341000 |
| H | 7.938019000  | 5.252964000  | 10.065913000 |
| H | 4.139866000  | 6.381216000  | 11.859294000 |
| C | 6.106968000  | 5.824144000  | 11.102263000 |
| H | 6.625598000  | 6.067114000  | 12.043056000 |
| H | 4.290184000  | 5.080578000  | 7.725599000  |
| N | 6.986620000  | 4.523841000  | 7.726670000  |
| C | 8.799539000  | 2.496707000  | 11.203973000 |
| H | 8.870226000  | 3.456147000  | 11.763501000 |
| H | 8.936071000  | 1.672769000  | 11.936926000 |
| H | 9.648299000  | 2.457815000  | 10.494737000 |
| C | 7.589322000  | -0.560704000 | 8.179568000  |
| H | 7.653670000  | -1.311497000 | 7.365458000  |
| H | 7.766514000  | -1.086027000 | 9.143789000  |
| H | 6.565154000  | -0.148522000 | 8.191841000  |
| P | 7.935290000  | 4.324987000  | 5.265801000  |
| O | 9.310159000  | 4.860272000  | 5.880916000  |
| C | 8.077296000  | -0.245490000 | 4.648212000  |
| C | 9.246544000  | 0.525869000  | 4.524875000  |
| C | 6.861818000  | 0.360850000  | 5.007848000  |
| H | 10.198185000 | 0.047764000  | 4.249954000  |
| H | 5.949419000  | -0.242264000 | 5.121006000  |
| C | 9.204352000  | 1.908830000  | 4.743490000  |
| C | 6.806449000  | 1.743510000  | 5.235118000  |
| H | 10.113861000 | 2.517202000  | 4.636318000  |
| H | 5.855097000  | 2.201028000  | 5.543107000  |
| C | 7.980711000  | 2.521669000  | 5.096371000  |
| H | 8.114334000  | -1.329039000 | 4.458903000  |
| C | 6.962208000  | 4.456263000  | 2.672142000  |

|   |             |             |             |
|---|-------------|-------------|-------------|
| C | 7.742280000 | 5.091599000 | 3.660989000 |
| C | 6.678935000 | 5.139214000 | 1.480005000 |
| H | 6.074793000 | 4.652090000 | 0.700300000 |
| C | 8.246826000 | 6.395506000 | 3.464102000 |
| C | 7.171721000 | 6.440106000 | 1.281565000 |
| H | 8.841557000 | 6.880456000 | 4.250703000 |
| H | 6.943851000 | 6.973349000 | 0.346392000 |
| C | 7.957653000 | 7.063333000 | 2.267752000 |
| H | 8.342187000 | 8.080683000 | 2.106586000 |
| H | 6.583026000 | 3.435144000 | 2.830421000 |
| H | 9.489422000 | 4.383213000 | 6.801473000 |

## TS<sub>HI</sub>

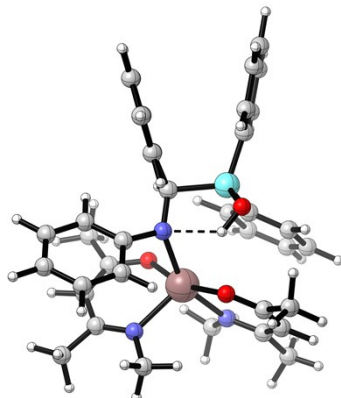

|    |              |              |              |
|----|--------------|--------------|--------------|
| In | 7.696704000  | 2.439257000  | 8.369594000  |
| O  | 9.725460000  | 3.255546000  | 8.228818000  |
| O  | 5.651969000  | 1.813610000  | 7.930047000  |
| N  | 8.574442000  | 0.472633000  | 7.985880000  |
| N  | 7.267795000  | 2.359402000  | 10.490330000 |
| C  | 10.803869000 | 2.609028000  | 7.890206000  |
| C  | 10.887075000 | 1.229032000  | 7.671522000  |
| H  | 11.885786000 | 0.848002000  | 7.421268000  |
| C  | 9.865705000  | 0.232295000  | 7.759126000  |
| C  | 12.027792000 | 3.475953000  | 7.730715000  |
| H  | 11.832215000 | 4.240110000  | 6.949292000  |
| H  | 12.932348000 | 2.901720000  | 7.460542000  |
| H  | 12.215711000 | 4.029952000  | 8.673500000  |
| C  | 10.310586000 | -1.202092000 | 7.582651000  |
| H  | 10.084808000 | -1.798667000 | 8.491266000  |
| H  | 11.394760000 | -1.268080000 | 7.385398000  |
| H  | 9.767608000  | -1.689070000 | 6.746244000  |
| C  | 4.844534000  | 2.342413000  | 10.149676000 |
| H  | 3.906103000  | 2.504512000  | 10.694627000 |
| C  | 4.696624000  | 2.055943000  | 8.786415000  |
| C  | 6.020316000  | 2.435259000  | 10.957236000 |
| C  | 3.309430000  | 1.991307000  | 8.190212000  |
| H  | 3.209747000  | 2.769785000  | 7.403496000  |
| H  | 2.509480000  | 2.137079000  | 8.938155000  |
| H  | 3.165084000  | 1.011922000  | 7.689103000  |
| C  | 5.819227000  | 2.646578000  | 12.438647000 |
| H  | 6.278583000  | 1.825841000  | 13.028142000 |
| H  | 4.748383000  | 2.704556000  | 12.697541000 |
| H  | 6.309136000  | 3.590044000  | 12.756072000 |
| C  | 6.110506000  | 6.122150000  | 6.153706000  |
| C  | 5.047205000  | 6.341928000  | 5.257559000  |
| C  | 6.876346000  | 7.215765000  | 6.604035000  |
| C  | 4.752721000  | 7.638453000  | 4.810331000  |
| C  | 6.575443000  | 8.513200000  | 6.163121000  |
| C  | 5.518081000  | 8.726926000  | 5.262225000  |
| H  | 4.451864000  | 5.487515000  | 4.898503000  |
| H  | 7.705687000  | 7.043980000  | 7.304112000  |

|   |              |              |              |
|---|--------------|--------------|--------------|
| H | 3.920115000  | 7.801499000  | 4.109729000  |
| H | 7.170602000  | 9.363822000  | 6.526974000  |
| H | 5.284922000  | 9.745190000  | 4.916957000  |
| C | 6.504203000  | 4.697001000  | 6.507835000  |
| H | 5.642236000  | 4.014331000  | 6.294615000  |
| C | 5.304422000  | 5.517914000  | 9.058284000  |
| C | 6.665283000  | 5.161963000  | 8.908257000  |
| C | 4.855370000  | 6.121776000  | 10.241847000 |
| H | 3.793290000  | 6.393703000  | 10.339462000 |
| C | 7.559934000  | 5.439549000  | 9.970766000  |
| C | 5.744345000  | 6.373351000  | 11.300654000 |
| H | 8.622764000  | 5.182593000  | 9.839370000  |
| H | 5.385666000  | 6.848701000  | 12.225514000 |
| C | 7.101651000  | 6.031137000  | 11.155880000 |
| H | 7.815058000  | 6.249680000  | 11.965930000 |
| H | 4.591287000  | 5.306529000  | 8.249504000  |
| N | 7.175703000  | 4.495767000  | 7.765673000  |
| C | 8.406710000  | 2.434815000  | 11.399196000 |
| H | 8.436035000  | 3.403352000  | 11.943116000 |
| H | 8.391162000  | 1.619635000  | 12.154337000 |
| H | 9.345465000  | 2.345428000  | 10.820563000 |
| C | 7.633362000  | -0.638590000 | 8.111220000  |
| H | 7.686131000  | -1.330701000 | 7.245411000  |
| H | 7.824493000  | -1.229173000 | 9.034194000  |
| H | 6.605889000  | -0.236438000 | 8.159552000  |
| P | 7.870866000  | 4.254760000  | 5.291090000  |
| O | 9.211263000  | 4.850084000  | 5.959214000  |
| C | 8.272364000  | -0.264910000 | 4.530426000  |
| C | 9.412869000  | 0.557225000  | 4.532575000  |
| C | 7.007046000  | 0.271793000  | 4.825998000  |
| H | 10.402235000 | 0.130529000  | 4.312568000  |
| H | 6.117998000  | -0.375064000 | 4.842515000  |
| C | 9.295101000  | 1.924595000  | 4.812120000  |
| C | 6.872707000  | 1.638103000  | 5.108052000  |
| H | 10.181755000 | 2.574269000  | 4.811613000  |
| H | 5.886387000  | 2.045114000  | 5.371240000  |
| C | 8.020374000  | 2.465989000  | 5.095172000  |
| H | 8.370095000  | -1.335333000 | 4.294028000  |
| C | 6.926837000  | 4.386916000  | 2.694333000  |
| C | 7.661276000  | 5.045738000  | 3.703958000  |
| C | 6.602205000  | 5.081451000  | 1.520015000  |
| H | 6.033060000  | 4.576219000  | 0.725632000  |
| C | 8.081977000  | 6.384226000  | 3.541379000  |
| C | 7.008093000  | 6.416949000  | 1.357905000  |
| H | 8.649988000  | 6.883362000  | 4.338143000  |
| H | 6.747186000  | 6.958809000  | 0.436462000  |
| C | 7.751487000  | 7.063056000  | 2.362277000  |
| H | 8.073518000  | 8.105676000  | 2.227395000  |
| H | 6.614488000  | 3.339324000  | 2.823370000  |
| H | 9.096356000  | 4.699401000  | 6.958175000  |

## I

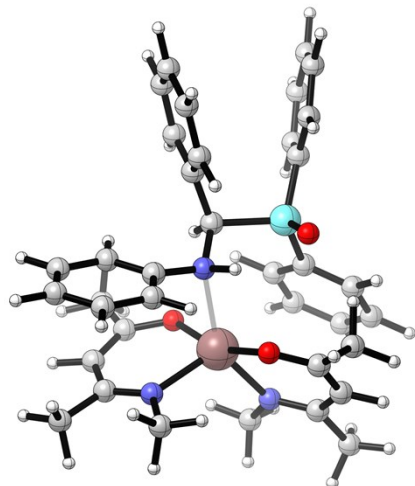

|    |              |              |              |
|----|--------------|--------------|--------------|
| In | 7.731123000  | 2.346846000  | 8.461823000  |
| O  | 9.717925000  | 3.153618000  | 8.586293000  |
| O  | 5.697041000  | 2.012162000  | 7.860835000  |
| N  | 8.578104000  | 0.407422000  | 8.045530000  |
| N  | 7.140821000  | 2.453615000  | 10.541653000 |
| C  | 10.757727000 | 2.594936000  | 8.032619000  |
| C  | 10.847733000 | 1.245238000  | 7.658936000  |
| H  | 11.824614000 | 0.927325000  | 7.271799000  |
| C  | 9.864292000  | 0.215527000  | 7.731012000  |
| C  | 11.901900000 | 3.536215000  | 7.781325000  |
| H  | 11.561698000 | 4.249491000  | 6.998762000  |
| H  | 12.821199000 | 3.023387000  | 7.445630000  |
| H  | 12.115319000 | 4.128947000  | 8.693504000  |
| C  | 10.322641000 | -1.192690000 | 7.432702000  |
| H  | 10.223492000 | -1.830692000 | 8.336245000  |
| H  | 11.378224000 | -1.210527000 | 7.111409000  |
| H  | 9.700038000  | -1.659942000 | 6.643563000  |
| C  | 4.747511000  | 2.220117000  | 10.078971000 |
| H  | 3.775298000  | 2.226047000  | 10.587835000 |
| C  | 4.687271000  | 2.052640000  | 8.692269000  |
| C  | 5.870423000  | 2.416541000  | 10.943956000 |
| C  | 3.346188000  | 1.907763000  | 8.014387000  |
| H  | 3.199157000  | 2.745410000  | 7.299357000  |
| H  | 2.502217000  | 1.895096000  | 8.727476000  |
| H  | 3.330384000  | 0.973987000  | 7.415419000  |
| C  | 5.574304000  | 2.611637000  | 12.411248000 |
| H  | 6.106515000  | 1.863029000  | 13.033319000 |
| H  | 4.493537000  | 2.536946000  | 12.620735000 |
| H  | 5.925237000  | 3.612271000  | 12.738879000 |
| C  | 6.343902000  | 6.156581000  | 6.151102000  |
| C  | 5.195631000  | 6.355521000  | 5.361103000  |
| C  | 7.145939000  | 7.261885000  | 6.498273000  |
| C  | 4.858102000  | 7.640331000  | 4.912121000  |
| C  | 6.800500000  | 8.548567000  | 6.059617000  |
| C  | 5.661231000  | 8.739575000  | 5.260019000  |
| H  | 4.573009000  | 5.492754000  | 5.076491000  |
| H  | 8.056494000  | 7.114334000  | 7.096726000  |
| H  | 3.962950000  | 7.785557000  | 4.289417000  |
| H  | 7.430856000  | 9.406384000  | 6.337060000  |
| H  | 5.396165000  | 9.748111000  | 4.909677000  |
| C  | 6.782830000  | 4.750074000  | 6.477384000  |
| H  | 5.937040000  | 4.039173000  | 6.386789000  |
| C  | 5.478766000  | 5.345029000  | 9.097667000  |
| C  | 6.870160000  | 5.231227000  | 8.944281000  |
| C  | 4.958487000  | 5.896587000  | 10.278145000 |
| H  | 3.868413000  | 5.989402000  | 10.394870000 |
| C  | 7.738707000  | 5.675934000  | 9.957807000  |



|   |              |              |              |
|---|--------------|--------------|--------------|
| C | 5.816538000  | 6.332110000  | 11.301503000 |
| H | 8.826533000  | 5.572441000  | 9.821719000  |
| H | 5.401790000  | 6.770401000  | 12.221342000 |
| C | 7.208820000  | 6.224545000  | 11.134679000 |
| H | 7.890105000  | 6.580247000  | 11.922119000 |
| H | 4.802652000  | 5.012686000  | 8.299492000  |
| N | 7.441863000  | 4.578613000  | 7.792251000  |
| C | 8.219449000  | 2.664074000  | 11.506661000 |
| H | 8.074812000  | 3.602954000  | 12.080400000 |
| H | 8.293885000  | 1.822993000  | 12.229620000 |
| H | 9.180855000  | 2.744525000  | 10.966017000 |
| C | 7.652106000  | -0.720110000 | 8.121692000  |
| H | 7.583595000  | -1.265703000 | 7.157568000  |
| H | 7.952322000  | -1.443807000 | 8.909317000  |
| H | 6.639631000  | -0.348357000 | 8.363443000  |
| P | 8.165701000  | 4.278935000  | 5.265341000  |
| O | 9.472071000  | 4.820695000  | 5.845942000  |
| C | 8.228919000  | -0.278745000 | 4.491771000  |
| C | 9.415105000  | 0.475779000  | 4.495927000  |
| C | 7.001197000  | 0.330274000  | 4.804623000  |
| H | 10.375464000 | -0.004650000 | 4.257416000  |
| H | 6.074078000  | -0.261638000 | 4.815326000  |
| C | 9.378631000  | 1.844107000  | 4.797812000  |
| C | 6.952783000  | 1.701814000  | 5.096157000  |
| H | 10.297924000 | 2.447804000  | 4.802920000  |
| H | 5.988610000  | 2.165948000  | 5.346412000  |
| C | 8.142995000  | 2.465093000  | 5.086432000  |
| H | 8.260197000  | -1.349279000 | 4.237888000  |
| C | 6.714777000  | 4.384009000  | 2.844401000  |
| C | 7.656993000  | 5.004015000  | 3.689140000  |
| C | 6.242134000  | 5.071637000  | 1.716314000  |
| H | 5.509964000  | 4.591898000  | 1.049402000  |
| C | 8.143767000  | 6.295328000  | 3.397233000  |
| C | 6.707236000  | 6.368059000  | 1.436382000  |
| H | 8.887691000  | 6.754871000  | 4.064567000  |
| H | 6.329736000  | 6.905130000  | 0.553381000  |
| C | 7.661338000  | 6.975739000  | 2.271185000  |
| H | 8.031768000  | 7.985690000  | 2.042863000  |
| H | 6.353234000  | 3.367202000  | 3.060050000  |
| H | 8.449433000  | 4.828269000  | 7.676283000  |

## 12.4 XYZ coordinates of the molecules present in Fig. FS112

### Monomer<sup>TS</sup><sub>P(V)-P(III)</sub>

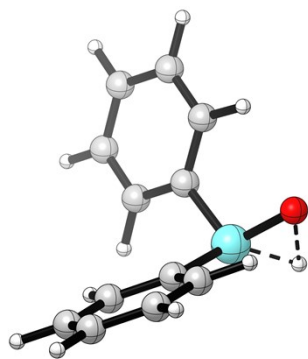

|   |             |              |             |
|---|-------------|--------------|-------------|
| P | 7.870578000 | 4.321486000  | 5.353009000 |
| O | 9.280238000 | 4.927783000  | 5.893662000 |
| C | 8.459585000 | -0.203265000 | 4.548691000 |
| C | 9.549233000 | 0.638939000  | 4.830224000 |
| C | 7.153027000 | 0.317472000  | 4.526318000 |

|   |              |              |             |
|---|--------------|--------------|-------------|
| H | 10.570227000 | 0.227716000  | 4.860414000 |
| H | 6.298347000  | -0.345489000 | 4.322111000 |
| C | 9.338766000  | 2.003443000  | 5.082541000 |
| C | 6.935093000  | 1.681759000  | 4.771808000 |
| H | 10.170752000 | 2.684597000  | 5.325615000 |
| H | 5.908186000  | 2.081128000  | 4.776739000 |
| C | 8.032553000  | 2.528793000  | 5.030308000 |
| H | 8.627390000  | -1.274084000 | 4.355922000 |
| C | 6.437168000  | 4.611385000  | 2.886176000 |
| C | 7.462266000  | 5.075714000  | 3.737333000 |
| C | 6.185251000  | 5.272649000  | 1.676195000 |
| H | 5.388659000  | 4.908142000  | 1.009229000 |
| C | 8.228304000  | 6.202307000  | 3.372916000 |
| C | 6.952204000  | 6.393903000  | 1.309105000 |
| H | 9.027416000  | 6.537851000  | 4.053632000 |
| H | 6.750924000  | 6.909001000  | 0.357488000 |
| C | 7.974585000  | 6.853778000  | 2.155320000 |
| H | 8.578351000  | 7.728262000  | 1.867471000 |
| H | 5.843457000  | 3.725147000  | 3.156015000 |
| H | 8.011283000  | 4.987538000  | 6.664427000 |

### DimerP(V)

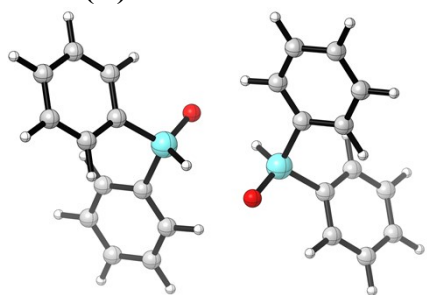

|   |              |              |              |
|---|--------------|--------------|--------------|
| P | 5.515965134  | 4.977530648  | 7.470861189  |
| O | 5.003227715  | 6.404033821  | 7.261621493  |
| H | 6.934535341  | 4.824137941  | 7.369539491  |
| P | 7.185536250  | 7.191391417  | 5.068746346  |
| O | 7.697589311  | 5.764584079  | 5.277538254  |
| H | 5.767009034  | 7.345455020  | 5.169711359  |
| C | 7.822901619  | 8.426407739  | 6.251012582  |
| C | 7.139907038  | 8.642060867  | 7.467483676  |
| C | 9.037115967  | 9.097303503  | 5.991308062  |
| C | 7.670840188  | 9.537459828  | 8.409765777  |
| C | 9.561441971  | 9.986969239  | 6.941072695  |
| C | 8.877083571  | 10.209553954 | 8.149183323  |
| H | 6.209040321  | 8.082123675  | 7.662540680  |
| H | 9.568909751  | 8.927827619  | 5.041844152  |
| H | 7.137533628  | 9.709365051  | 9.357523006  |
| H | 10.508741828 | 10.509490868 | 6.738604770  |
| H | 9.288692764  | 10.909922704 | 8.892723819  |
| C | 7.627390610  | 7.837920356  | 3.417443364  |
| C | 8.401562995  | 7.019855062  | 2.573499573  |
| C | 7.209772370  | 9.112317970  | 2.982035611  |
| C | 8.760594749  | 7.478041722  | 1.294952421  |
| C | 7.568871266  | 9.564949672  | 1.703563298  |
| C | 8.344855786  | 8.747989381  | 0.860587296  |
| H | 8.711271831  | 6.029641638  | 2.940945308  |
| H | 6.610833774  | 9.755410788  | 3.647583721  |
| H | 9.366074737  | 6.839819250  | 0.632732646  |
| H | 7.244416530  | 10.559530064 | 1.362208821  |
| H | 8.626158381  | 9.104956437  | -0.141776256 |
| C | 5.074871789  | 4.331418773  | 9.122541926  |
| C | 4.300725254  | 5.149520017  | 9.966472732  |

|   |             |             |              |
|---|-------------|-------------|--------------|
| C | 5.493061630 | 3.057310485 | 9.558245150  |
| C | 3.942289812 | 4.691659936 | 11.245306241 |
| C | 5.134554436 | 2.605001440 | 10.836998416 |
| C | 4.358597071 | 3.421999503 | 11.679965562 |
| H | 3.990529334 | 6.139488492 | 9.598776336  |
| H | 6.091957078 | 2.414175631 | 8.892701787  |
| H | 3.336823853 | 5.329909593 | 11.907513098 |
| H | 5.459440567 | 1.610638845 | 11.178577378 |
| H | 4.077745516 | 3.065281652 | 12.682544914 |
| C | 4.878813922 | 3.741776537 | 6.289272463  |
| C | 5.561243088 | 3.526172645 | 5.072493829  |
| C | 3.665145804 | 3.070208728 | 6.549865074  |
| C | 5.030369961 | 2.630107078 | 4.130808796  |
| C | 3.140870486 | 2.179887505 | 5.600689848  |
| C | 3.824714842 | 1.957312129 | 4.392286251  |
| H | 6.491599230 | 4.086706420 | 4.876706336  |
| H | 3.133749258 | 3.239669352 | 7.499551184  |
| H | 5.563264901 | 2.458223419 | 3.182817255  |
| H | 2.193998855 | 1.656854328 | 5.803850531  |
| H | 3.413159372 | 1.256400960 | 3.649226559  |

**DimerTS<sub>P(V)</sub>-P(III)**

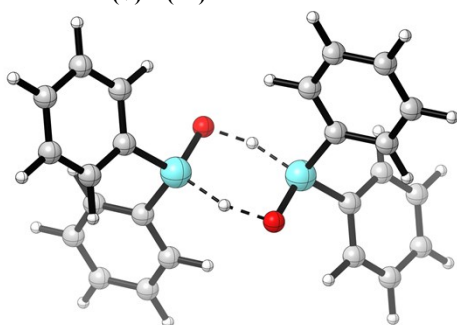

|   |              |              |             |
|---|--------------|--------------|-------------|
| P | 5.534854000  | 4.935958000  | 7.106702000 |
| O | 4.823897000  | 6.348011000  | 6.861789000 |
| H | 7.028692000  | 5.191614000  | 6.528361000 |
| P | 7.167382000  | 7.232672000  | 5.433695000 |
| O | 7.878325000  | 5.820610000  | 5.678590000 |
| H | 5.673576000  | 6.977029000  | 6.011949000 |
| C | 7.901875000  | 8.527408000  | 6.500165000 |
| C | 7.254792000  | 8.791079000  | 7.726885000 |
| C | 9.093283000  | 9.208099000  | 6.174553000 |
| C | 7.795370000  | 9.730720000  | 8.618472000 |
| C | 9.629479000  | 10.146970000 | 7.068847000 |
| C | 8.981117000  | 10.408937000 | 8.289278000 |
| H | 6.325075000  | 8.251601000  | 7.970875000 |
| H | 9.597286000  | 9.003510000  | 5.217020000 |
| H | 7.287701000  | 9.936637000  | 9.573179000 |
| H | 10.560127000 | 10.677293000 | 6.815065000 |
| H | 9.403357000  | 11.147921000 | 8.987947000 |
| C | 7.568154000  | 7.755893000  | 3.734002000 |
| C | 8.266010000  | 6.865735000  | 2.893819000 |
| C | 7.154057000  | 9.012644000  | 3.242960000 |
| C | 8.552736000  | 7.235166000  | 1.569249000 |
| C | 7.442809000  | 9.375225000  | 1.919244000 |
| C | 8.141958000  | 8.486951000  | 1.080789000 |
| H | 8.584052000  | 5.894669000  | 3.302849000 |
| H | 6.612431000  | 9.710726000  | 3.901515000 |
| H | 9.101230000  | 6.540592000  | 0.913988000 |
| H | 7.121958000  | 10.356693000 | 1.538250000 |
| H | 8.367109000  | 8.773864000  | 0.042349000 |
| C | 5.134120000  | 4.412780000  | 8.806423000 |
| C | 4.436204000  | 5.302924000  | 9.646571000 |
| C | 5.548297000  | 3.156074000  | 9.297516000 |

|   |             |             |              |
|---|-------------|-------------|--------------|
| C | 4.149498000 | 4.933525000 | 10.971154000 |
| C | 5.259563000 | 2.793524000 | 10.621243000 |
| C | 4.560354000 | 3.681785000 | 11.459663000 |
| H | 4.118103000 | 6.273954000 | 9.237502000  |
| H | 6.089970000 | 2.458003000 | 8.638989000  |
| H | 3.600956000 | 5.628088000 | 11.626387000 |
| H | 5.580477000 | 1.812092000 | 11.002277000 |
| H | 4.335219000 | 3.394897000 | 12.498114000 |
| C | 4.800289000 | 3.641192000 | 6.040306000  |
| C | 5.447298000 | 3.377487000 | 4.813554000  |
| C | 3.608905000 | 2.960505000 | 6.366007000  |
| C | 4.906673000 | 2.437820000 | 3.922025000  |
| C | 3.072659000 | 2.021605000 | 5.471772000  |
| C | 3.720950000 | 1.759605000 | 4.251310000  |
| H | 6.377002000 | 3.916958000 | 4.569494000  |
| H | 3.104960000 | 3.165120000 | 7.323564000  |
| H | 5.414286000 | 2.231875000 | 2.967294000  |
| H | 2.142029000 | 1.491285000 | 5.725626000  |
| H | 3.298672000 | 1.020596000 | 3.552690000  |

### DimerP(III)

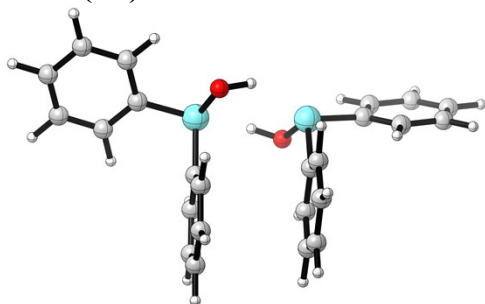

|   |             |              |              |
|---|-------------|--------------|--------------|
| P | 5.399819000 | 4.334877000  | 5.710053000  |
| O | 4.224093000 | 5.527020000  | 5.571671000  |
| H | 7.234304000 | 5.174922000  | 4.556451000  |
| P | 6.688430000 | 7.272730000  | 4.609672000  |
| O | 7.782045000 | 6.003128000  | 4.480410000  |
| H | 4.630884000 | 6.235276000  | 5.002326000  |
| C | 6.911260000 | 7.855994000  | 6.342701000  |
| C | 5.887650000 | 8.623924000  | 6.933074000  |
| C | 8.053628000 | 7.515701000  | 7.092849000  |
| C | 6.025996000 | 9.089361000  | 8.250931000  |
| C | 8.179331000 | 7.965197000  | 8.414463000  |
| C | 7.173004000 | 8.760857000  | 8.991396000  |
| H | 4.973088000 | 8.850644000  | 6.360354000  |
| H | 8.827580000 | 6.884387000  | 6.630976000  |
| H | 5.227139000 | 9.695262000  | 8.706113000  |
| H | 9.066229000 | 7.688014000  | 9.004237000  |
| H | 7.276602000 | 9.111321000  | 10.029435000 |
| C | 7.630050000 | 8.546807000  | 3.675745000  |
| C | 8.363888000 | 8.161126000  | 2.533528000  |
| C | 7.566861000 | 9.911156000  | 4.030858000  |
| C | 9.027733000 | 9.127997000  | 1.762648000  |
| C | 8.227572000 | 10.873968000 | 3.252619000  |
| C | 8.958672000 | 10.486287000 | 2.116477000  |
| H | 8.426617000 | 7.095289000  | 2.266838000  |
| H | 7.016651000 | 10.220105000 | 4.933012000  |
| H | 9.603948000 | 8.816322000  | 0.877588000  |
| H | 8.179710000 | 11.935168000 | 3.542909000  |
| H | 9.478276000 | 11.242869000 | 1.509010000  |
| C | 6.109813000 | 4.631091000  | 7.385599000  |
| C | 5.418970000 | 5.386081000  | 8.353153000  |
| C | 7.388803000 | 4.117260000  | 7.677970000  |
| C | 5.994884000 | 5.598447000  | 9.613141000  |
| C | 7.954693000 | 4.315732000  | 8.948197000  |

|   |             |              |              |
|---|-------------|--------------|--------------|
| C | 7.256183000 | 5.054829000  | 9.916224000  |
| H | 4.436972000 | 5.811284000  | 8.097778000  |
| H | 7.951370000 | 3.571481000  | 6.902331000  |
| H | 5.459352000 | 6.196422000  | 10.366149000 |
| H | 8.951945000 | 3.909639000  | 9.175782000  |
| H | 7.703986000 | 5.225460000  | 10.907289000 |
| C | 4.305001000 | 2.896192000  | 6.044525000  |
| C | 4.803254000 | 1.764958000  | 6.725942000  |
| C | 2.983379000 | 2.885012000  | 5.552767000  |
| C | 3.987220000 | 0.639533000  | 6.914365000  |
| C | 2.169614000 | 1.756849000  | 5.748495000  |
| C | 2.668589000 | 0.631691000  | 6.425965000  |
| H | 5.827669000 | 1.770687000  | 7.129874000  |
| H | 2.596489000 | 3.774753000  | 5.034973000  |
| H | 4.380948000 | -0.235599000 | 7.454106000  |
| H | 1.135890000 | 1.759733000  | 5.369905000  |
| H | 2.028874000 | -0.251177000 | 6.578792000  |

### P(III) or Ph<sub>2</sub>P–OH

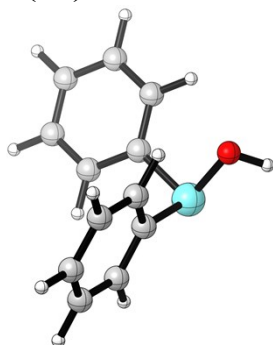

|   |              |              |             |
|---|--------------|--------------|-------------|
| P | 7.363321000  | 4.285442000  | 5.567359000 |
| O | 8.851859000  | 4.931974000  | 6.067226000 |
| C | 8.800040000  | 0.002488000  | 4.382126000 |
| C | 9.606003000  | 0.809615000  | 5.201284000 |
| C | 7.574200000  | 0.499857000  | 3.904160000 |
| H | 10.569632000 | 0.429214000  | 5.573794000 |
| H | 6.938625000  | -0.126247000 | 3.258523000 |
| C | 9.191528000  | 2.107197000  | 5.546726000 |
| C | 7.158183000  | 1.795395000  | 4.243642000 |
| H | 9.821528000  | 2.750783000  | 6.178573000 |
| H | 6.203174000  | 2.181078000  | 3.852896000 |
| C | 7.966670000  | 2.610235000  | 5.065041000 |
| H | 9.125451000  | -1.013735000 | 4.113107000 |
| C | 5.935277000  | 5.085590000  | 3.278651000 |
| C | 7.209814000  | 5.024542000  | 3.877502000 |
| C | 5.788668000  | 5.598609000  | 1.978272000 |
| H | 4.791682000  | 5.637333000  | 1.512315000 |
| C | 8.332561000  | 5.513731000  | 3.178839000 |
| C | 6.910802000  | 6.076709000  | 1.282268000 |
| H | 9.321009000  | 5.477865000  | 3.662133000 |
| H | 6.796283000  | 6.485890000  | 0.267111000 |
| C | 8.180566000  | 6.040459000  | 1.887932000 |
| H | 9.059556000  | 6.421201000  | 1.344962000 |
| H | 5.050570000  | 4.735585000  | 3.835798000 |
| H | 8.682756000  | 5.479133000  | 6.856541000 |

### 13. Reference.

1. Y. C. Chang, P. T. Yuan and F.E. Hong, C–H Bond Functionalization of 1,4-Benzoquinone by Silver-Mediated Regioselective Phosphination and Amination Reactions, *Eur. J. Org. Chem.*, 2017, **17**, 2441-2450.
2. G. Keglevich and A. Szekrenyi, Eco-Friendly Accomplishment of the Extended Kabachnik-Fields Reaction; a Solvent- and Catalyst-Free Microwave-Assisted Synthesis of  $\alpha$ -Aminophosphonates and  $\alpha$ -Aminophosphine Oxides, *Letts. Org. Chem.*, 2008, **5**, 616-622.
3. P. Srinivasan, S. B. Maravanji, M. Joel and T. M. Shaikh, Insertion of Carbon Fragments into P(III)–N Bonds in Aminophosphines and Aminobis(phosphines): Synthesis, Reactivity, and Coordination Chemistry of Resulting Phosphine Oxide Derivatives. Crystal and Molecular Structures of  $(\text{Ph}_2\text{P}(\text{O})\text{CH}_2)_2\text{NR}$  (R = Me, <sup>n</sup>Pr, <sup>n</sup>Bu),  $\text{Ph}_2\text{P}(\text{O})\text{CH}(\text{OH})\text{nPr}$ , and *cis*- $[\text{MoO}_2\text{Cl}_2\{(\text{Ph}_2\text{P}(\text{O})\text{CH}_2)_2\text{NEt-}\kappa\text{O},\kappa\text{O}\}]$ , *Inorg. Chem.*, 2003, **42**, 1272-1281.
4. B. B. N. Ben-Aroya and M. Portnoy, Preparation of  $\alpha$ -aminophosphines on solid support: model studies and parallel synthesis, *Tetrahedron*, 2002, **58**, 5147-5158.
5. F. Neese, The ORCA program system, *WIREs Comput. Mol. Sci.* 2012, **2**, 73–78.
6. J. P. Perdew, Density-functional approximation for the correlation energy of the inhomogeneous electron gas, *Phys. Rev. B* 1986, **33**, 8822–8824.
7. A. D. Becke, Density-functional exchange-energy approximation with correct asymptotic behavior, *Phys. Rev. A* 1988, **38**, 3098–3100.
8. F. Weigend, R. Ahlrichs, Balanced basis sets of split valence, triple zeta valence and quadruple zeta valence quality for H to Rn: Design and assessment of accuracy, *Phys. Chem. Chem. Phys.* 2005, **7**, 3297–3305.
9. R. A. Kendall, H. A. Früchtl, The impact of the resolution of the identity approximate integral method on modern ab initio algorithm development, *Theor. Chem. Acc.* 1997, **97**, 158–163.
10. K. Eichkorn, O. Treutler, H. Öhm, M. Häser, R. Ahlrichs, Auxiliary basis sets to approximate Coulomb potentials, *Chem. Phys. Lett.* 1995, **240**, 283–290.
11. K. Eichkorn, F. Weigend, O. Treutler, R. Ahlrichs, Auxiliary basis sets for main row atoms and transition metals and their use to approximate Coulomb potentials, *Theor. Chem. Acc.* 1997, **97**, 119–124.

12. S. Grimme, S. Ehrlich, L. Goerigk, Effect of the damping function in dispersion corrected density functional theory, *J. Comput. Chem.* 2011, **32**, 1456–1465.
13. B. G. Janesko, H. C. Fisher, M. J. Bridle, J. L. Montchamp, P(=O)H to P–OH Tautomerism: A Theoretical and Experimental Study, *J. Org. Chem.* 2015, **80**, 10025–10032.
14. D. Vincze, P. Abranyi-Balogh, P. Bagi, G. Keglevich, A Mechanistic Study on the Tautomerism of H-Phosponates, H-Phosphinates and Secondary Phosphine Oxides, *Molecules* 2019, **24**, 3859.
15. C. Wei, C. Wu, Y. Huang, R. Kultyshev, F. Hong, Experimental and DFT Study of the Tautomeric Behavior of Cobalt-Containing Secondary Phosphine Oxides, *Chem. Eur. J.* 2007, **13**, 1583–1593.
